# Supplementary material
Source: PubMed Central journal article supplement (PMC3839241)
Supplement: NIHMS341755-supplement-02.pdf [file NIHMS341755-supplement-02.pdf]

|           |        |   |
|-----------|--------|---|
| design_33 | 0.260  | 3 |
| design_34 | 0.267  | 3 |
| design_35 | 2.559  | 5 |
| design_36 | 2.716  | 5 |
| design_37 | -1.230 | 1 |
| design_38 | -0.630 | 2 |
| design_39 | 2.214  | 5 |
| design_40 | 13.284 | 5 |
| design_41 | 3.465  | 5 |
| design_42 | 0.154  | 3 |
| design_43 | -2.013 | 1 |
| design_44 | 2.654  | 5 |
| design_45 | 0.938  | 3 |
| design_46 | -0.296 | 2 |
| design_47 | 0.180  | 3 |
| design_48 | 5.867  | 5 |
| design_49 | 0.756  | 3 |
| design_50 | -0.419 | 2 |
| design_51 | -0.438 | 2 |
| design_52 | 1.509  | 4 |
| design_53 | 1.841  | 4 |
| design_54 | 1.973  | 4 |
| design_55 | -0.419 | 2 |
| design_56 | 2.527  | 5 |
| design_57 | 0.993  | 3 |
| design_58 | -4.139 | 1 |
| design_59 | 0.840  | 3 |
| design_60 | 0.675  | 3 |
| design_61 | -1.976 | 1 |
| design_62 | 0.067  | 3 |
| design_63 | -1.950 | 1 |
| design_64 | 2.907  | 5 |
| design_65 | -1.190 | 1 |
| design_66 | -0.361 | 2 |
| design_67 | 3.298  | 5 |
| design_68 | 0.055  | 3 |
| design_69 | -1.472 | 1 |
| design_70 | 0.431  | 3 |
| design_71 | -0.087 | 2 |
| design_72 | -0.833 | 2 |
| design_73 | -0.268 | 2 |
| design_74 | 2.325  | 5 |
| design_75 | -0.288 | 2 |
| design_76 | -0.063 | 2 |
| design_77 | -3.094 | 1 |
| design_78 | 0.050  | 3 |

|           |        |   |
|-----------|--------|---|
| design_79 | 1.005  | 4 |
| design_80 | 0.223  | 3 |
| design_81 | -0.417 | 2 |
| design_82 | -0.085 | 2 |
| design_83 | -0.126 | 2 |
| design_84 | 0.037  | 3 |
| design_85 | -0.500 | 2 |
| design_86 | 3.683  | 5 |
| design_87 | 0.700  | 3 |
| 1A2K      | -1.601 | 1 |
| 1ACB      | -0.323 | 2 |
| 1AHW      | -3.182 | 1 |
| 1AK4      | -1.000 | 2 |
| 1AKJ      | -2.298 | 1 |
| 1AVX      | -0.953 | 2 |
| 1AY7      | -0.422 | 2 |
| 1AZS      | -1.747 | 1 |
| 1B6C      | 1.285  | 4 |
| 1BGX      | -1.731 | 1 |
| 1BJ1      | -8.934 | 1 |
| 1BKD      | -0.690 | 2 |
| 1BUH      | -0.482 | 2 |
| 1BVK      | 0.812  | 3 |
| 1BVN      | 0.631  | 3 |
| 1CGI      | 0.466  | 3 |
| 1D6R      | 0.165  | 3 |
| 1DE4      | -7.190 | 1 |
| 1DFJ      | -3.309 | 1 |
| 1DQJ      | 2.064  | 5 |
| 1E4K      | -0.027 | 2 |
| 1E6J      | -1.902 | 1 |
| 1E96      | -0.765 | 2 |
| 1EAW      | -1.476 | 1 |
| 1EER      | -8.048 | 1 |
| 1EFN      | -2.064 | 1 |
| 1EWY      | -1.078 | 1 |
| 1EZU      | 1.674  | 4 |
| 1F34      | 5.090  | 5 |
| 1F51      | 2.175  | 5 |
| 1FAK      | 1.985  | 4 |
| 1FC2      | 0.904  | 3 |
| 1FQ1      | -1.812 | 1 |
| 1FQJ      | -2.862 | 1 |
| 1FSK      | -4.625 | 1 |
| 1GCQ      | 0.438  | 3 |
| 1GHQ      | 1.920  | 4 |

|      |         |   |
|------|---------|---|
| 1GLA | -7.982  | 1 |
| 1GP2 | -4.221  | 1 |
| 1GPW | -6.309  | 1 |
| 1GRN | -1.393  | 1 |
| 1H1V | 3.796   | 5 |
| 1HE1 | -0.381  | 2 |
| 1HE8 | 2.214   | 5 |
| 1HIA | -1.525  | 1 |
| 1I2M | -7.028  | 1 |
| 1I4D | 0.695   | 3 |
| 1I9R | -3.302  | 1 |
| 1IB1 | 0.870   | 3 |
| 1IBR | -7.444  | 1 |
| 1IJK | -7.494  | 1 |
| 1IQD | -2.529  | 1 |
| 1IRA | 0.571   | 3 |
| 1J2J | -0.810  | 2 |
| 1JMO | -4.288  | 1 |
| 1JPS | -5.017  | 1 |
| 1K4C | -2.062  | 1 |
| 1K5D | -8.320  | 1 |
| 1K74 | -3.891  | 1 |
| 1KAC | -1.123  | 1 |
| 1KKL | 3.700   | 5 |
| 1KLU | -1.855  | 1 |
| 1KTZ | -2.377  | 1 |
| 1KXP | -0.853  | 2 |
| 1KXQ | -0.974  | 2 |
| 1M10 | -5.628  | 1 |
| 1MAH | -3.736  | 1 |
| 1ML0 | -13.882 | 1 |
| 1MLC | -2.617  | 1 |
| 1N2C | -25.490 | 1 |
| 1N80 | 0.470   | 3 |
| 1NCA | -0.843  | 2 |
| 1NSN | 6.128   | 5 |
| 1NW9 | 0.885   | 3 |
| 1OPH | -2.697  | 1 |
| 1PPE | 0.261   | 3 |
| 1PXV | -1.320  | 1 |
| 1QA9 | -2.488  | 1 |
| 1QFW | -1.933  | 1 |
| 1R0R | 0.169   | 3 |
| 1R8S | -0.857  | 2 |
| 1RLB | -0.697  | 2 |
| 1S1Q | 0.051   | 3 |

|      |         |   |
|------|---------|---|
| 1SBB | -0.124  | 2 |
| 1T6B | 2.533   | 5 |
| 1UDI | -5.223  | 1 |
| 1VFB | 0.524   | 3 |
| 1WEJ | -8.803  | 1 |
| 1WQ1 | -1.764  | 1 |
| 1XD3 | -1.162  | 1 |
| 1XQS | -8.718  | 1 |
| 1Y64 | 0.371   | 3 |
| 1YVB | -1.888  | 1 |
| 1Z0K | -2.029  | 1 |
| 1Z5Y | 0.018   | 3 |
| 1ZHI | -2.936  | 1 |
| 2AJF | 0.591   | 3 |
| 2B42 | 0.291   | 3 |
| 2C0L | 0.845   | 3 |
| 2CFH | 0.732   | 3 |
| 2FD6 | 2.552   | 5 |
| 2H7V | 1.629   | 4 |
| 2HLE | -2.175  | 1 |
| 2HMI | 12.227  | 5 |
| 2HQS | 0.104   | 3 |
| 2HRK | -0.828  | 2 |
| 2I25 | 0.081   | 3 |
| 2JEL | -3.692  | 1 |
| 2MTA | 0.408   | 3 |
| 2NZ8 | -0.319  | 2 |
| 2O8V | 0.182   | 3 |
| 2O0B | 0.041   | 3 |
| 2OT3 | -1.537  | 1 |
| 2PCC | -8.250  | 1 |
| 2QFW | -1.068  | 1 |
| 2SIC | -0.131  | 2 |
| 2SNI | 0.289   | 3 |
| 2UUY | 0.191   | 3 |
| 2VIS | -1.518  | 1 |
| 7CEI | -10.742 | 1 |

\*\*\*\*\*

Group 4s-

Raw scores are given in units of average likelihood scores for surface contact point pairs (sorry, best I can do)

|          | Raw score | normalized score |
|----------|-----------|------------------|
| design_1 | -1.252    | 1                |
| design_2 | -0.664    | 3                |

|           |        |   |
|-----------|--------|---|
| design_3  | -0.033 | 4 |
| design_4  | -0.970 | 2 |
| design_5  | -0.315 | 4 |
| design_6  | -0.868 | 2 |
| design_7  | -0.932 | 2 |
| design_8  | -0.726 | 3 |
| design_9  | -0.970 | 2 |
| design_10 | -1.000 | 1 |
| design_11 | -0.925 | 2 |
| design_12 | -1.209 | 1 |
| design_13 | -0.675 | 3 |
| design_14 | -0.118 | 4 |
| design_15 | -0.781 | 2 |
| design_16 | -0.281 | 4 |
| design_17 | -0.071 | 4 |
| design_18 | -0.323 | 4 |
| design_19 | -0.691 | 3 |
| design_20 | -0.862 | 2 |
| design_21 | -1.150 | 1 |
| design_22 | -1.024 | 1 |
| design_23 | 0.234  | 4 |
| design_24 | -0.875 | 2 |
| design_25 | -0.677 | 3 |
| design_26 | -0.298 | 4 |
| design_27 | -0.373 | 4 |
| design_28 | -0.472 | 4 |
| design_29 | -0.767 | 2 |
| design_30 | -0.190 | 4 |
| design_31 | -0.418 | 4 |
| design_32 | -0.399 | 4 |
| design_33 | -0.349 | 4 |
| design_34 | -0.017 | 4 |
| design_35 | -0.291 | 4 |
| design_36 | -0.801 | 2 |
| design_37 | -1.222 | 1 |
| design_38 | -0.807 | 2 |
| design_39 | -0.549 | 3 |
| design_40 | -1.038 | 1 |
| design_41 | -0.436 | 4 |
| design_42 | -0.860 | 2 |
| design_43 | -0.852 | 2 |
| design_44 | -0.332 | 4 |
| design_45 | -0.829 | 2 |
| design_46 | -0.467 | 4 |
| design_47 | -0.966 | 2 |
| design_48 | -0.759 | 2 |

|           |        |   |
|-----------|--------|---|
| design_49 | -0.137 | 4 |
| design_50 | -0.383 | 4 |
| design_51 | -0.153 | 4 |
| design_52 | -1.063 | 1 |
| design_53 | -0.880 | 2 |
| design_54 | 0.302  | 4 |
| design_55 | -1.075 | 1 |
| design_56 | -0.770 | 2 |
| design_57 | -0.393 | 4 |
| design_58 | -0.767 | 2 |
| design_59 | -0.341 | 4 |
| design_60 | -0.320 | 4 |
| design_61 | -0.783 | 2 |
| design_62 | -0.815 | 2 |
| design_63 | -1.468 | 1 |
| design_64 | -0.863 | 2 |
| design_65 | -1.216 | 1 |
| design_66 | -1.393 | 1 |
| design_67 | -0.775 | 2 |
| design_68 | -0.457 | 4 |
| design_69 | -0.944 | 2 |
| design_70 | -0.205 | 4 |
| design_71 | -0.976 | 2 |
| design_72 | -0.569 | 3 |
| design_73 | -0.803 | 2 |
| design_74 | -0.610 | 3 |
| design_75 | -1.219 | 1 |
| design_76 | -0.804 | 2 |
| design_77 | -0.914 | 2 |
| design_78 | -0.923 | 2 |
| design_79 | -0.720 | 3 |
| design_80 | -0.612 | 3 |
| design_81 | -0.734 | 3 |
| design_82 | -0.895 | 2 |
| design_83 | -0.749 | 3 |
| design_84 | -0.651 | 3 |
| design_85 | -0.880 | 2 |
| design_86 | -0.790 | 2 |
| design_87 | -0.287 | 4 |
| 1A2K      | -1.113 | 1 |
| 1ACB      | -0.209 | 4 |
| 1AHW      | -1.256 | 1 |
| 1AK4      | -1.297 | 1 |
| 1AKJ      | -1.342 | 1 |
| 1AVX      | -0.132 | 4 |
| 1AY7      | -0.603 | 3 |

|      |        |   |
|------|--------|---|
| 1AZS | -0.158 | 4 |
| 1B6C | -0.638 | 3 |
| 1BGX | -0.435 | 4 |
| 1BJ1 | 0.649  | 4 |
| 1BKD | -1.208 | 1 |
| 1BUH | -0.787 | 2 |
| 1BVK | -0.680 | 3 |
| 1BVN | -0.673 | 3 |
| 1CGI | -0.060 | 4 |
| 1D6R | -0.412 | 4 |
| 1DE4 | -0.680 | 3 |
| 1DFJ | -0.748 | 3 |
| 1DQJ | -0.641 | 3 |
| 1E4K | -0.784 | 2 |
| 1E6J | -1.166 | 1 |
| 1E96 | -0.988 | 2 |
| 1EAW | -0.391 | 4 |
| 1EER | -1.429 | 1 |
| 1EFN | -1.011 | 1 |
| 1EWY | -1.002 | 1 |
| 1EZU | -0.178 | 4 |
| 1F34 | -0.199 | 4 |
| 1F51 | -0.801 | 2 |
| 1FAK | -1.005 | 1 |
| 1FC2 | -0.399 | 4 |
| 1FQ1 | -0.754 | 2 |
| 1FQJ | -0.823 | 2 |
| 1FSK | -0.276 | 4 |
| 1GCQ | -1.203 | 1 |
| 1GHQ | -0.431 | 4 |
| 1GLA | -1.650 | 1 |
| 1GP2 | -1.258 | 1 |
| 1GPW | -0.291 | 4 |
| 1GRN | -1.274 | 1 |
| 1H1V | -1.101 | 1 |
| 1HE1 | -1.097 | 1 |
| 1HE8 | -1.167 | 1 |
| 1HIA | 0.091  | 4 |
| 1I2M | -1.429 | 1 |
| 1I4D | -0.933 | 2 |
| 1I9R | -0.700 | 3 |
| 1IB1 | -1.327 | 1 |
| 1IBR | -1.239 | 1 |
| 1IJK | -1.518 | 1 |
| 1IRA | -0.775 | 2 |
| 1J2J | -1.177 | 1 |



|      |        |   |
|------|--------|---|
| 1JM0 | -0.469 | 4 |
| 1JPS | -1.196 | 1 |
| 1K4C | -0.683 | 3 |
| 1K5D | -0.904 | 2 |
| 1K74 | -1.446 | 1 |
| 1KAC | -1.397 | 1 |
| 1KKL | -0.982 | 2 |
| 1KLU | -0.816 | 2 |
| 1KTZ | -0.902 | 2 |
| 1KXP | -1.313 | 1 |
| 1KXQ | -0.607 | 3 |
| 1M10 | -1.270 | 1 |
| 1MAH | -0.718 | 3 |
| 1ML0 | -0.964 | 2 |
| 1MLC | -0.628 | 3 |
| 1N2C | -1.327 | 1 |
| 1N80 | -0.351 | 4 |
| 1NCA | -0.913 | 2 |
| 1NSN | -1.014 | 1 |
| 1NW9 | -0.247 | 4 |
| 1OPH | -0.212 | 4 |
| 1PPE | 0.248  | 4 |
| 1PXV | -0.838 | 2 |
| 1QA9 | -1.800 | 1 |
| 1QFW | -1.110 | 1 |
| 1R0R | -0.690 | 3 |
| 1R8S | -1.122 | 1 |
| 1RLB | -0.860 | 2 |
| 1S1Q | -0.530 | 3 |
| 1SBB | -0.647 | 3 |
| 1T6B | -0.851 | 2 |
| 1UDI | -1.415 | 1 |
| 1VFB | -0.879 | 2 |
| 1WEJ | -0.686 | 3 |
| 1WQ1 | -0.914 | 2 |
| 1XD3 | -0.982 | 2 |
| 1XQS | -1.207 | 1 |
| 1Y64 | -1.195 | 1 |
| 1YVB | -0.272 | 4 |
| 1Z0K | -1.133 | 1 |
| 1Z5Y | -1.066 | 1 |
| 1ZHI | -0.640 | 3 |
| 2AJF | -0.935 | 2 |
| 2B42 | -0.563 | 3 |
| 2C0L | -1.443 | 1 |
| 2CFH | -1.649 | 1 |

|      |        |   |
|------|--------|---|
| 2H7V | -1.607 | 1 |
| 2HLE | -0.772 | 2 |
| 2HMI | -0.033 | 4 |
| 2HQS | -1.132 | 1 |
| 2HRK | -1.043 | 1 |
| 2I25 | -0.878 | 2 |
| 2JEL | -0.780 | 2 |
| 2MTA | -0.513 | 3 |
| 2NZ8 | -1.080 | 1 |
| 2O8V | -0.195 | 4 |
| 2O0B | -0.412 | 4 |
| 2OT3 | -0.481 | 4 |
| 2PCC | -1.508 | 1 |
| 2QFW | -0.449 | 4 |
| 2SIC | -0.329 | 4 |
| 2SNI | -0.662 | 3 |
| 2UUY | -0.216 | 4 |
| 2VIS | -0.876 | 2 |
| 7CEI | -1.383 | 1 |

\*\*\*\*\*

Group 5s-

|      |       |   |
|------|-------|---|
| 1A2K | 4.958 | 1 |
| 1ACB | 5.213 | 1 |
| 1AHW | 4.541 | 1 |
| 1AK4 | 4.081 | 1 |
| 1AKJ | 3.431 | 1 |
| 1AVX | 4.811 | 1 |
| 1AY7 | 3.356 | 1 |
| 1AZS | 3.412 | 1 |
| 1B6C | 4.625 | 1 |
| 1BGX | 6.778 | 1 |
| 1BJ1 | 3.900 | 1 |
| 1BKD | 6.343 | 1 |
| 1BUH | 2.962 | 2 |
| 1BVK | 2.320 | 2 |
| 1BVN | 5.423 | 1 |
| 1CGI | 4.525 | 1 |
| 1D6R | 1.100 | 3 |
| 1DFJ | 3.702 | 1 |
| 1DQJ | 4.910 | 1 |
| 1E4K | 2.494 | 2 |
| 1E6J | 4.655 | 1 |
| 1E96 | 2.290 | 2 |
| 1EAW | 2.823 | 2 |

1EER 6.672 1  
1EFN 3.538 1  
1EWY 1.989 3  
1EZU 5.288 1  
1F34 5.466 1  
1F51 4.728 1  
1FAK 6.095 1  
1FC2 3.840 1  
1FQ1 3.308 1  
1FQJ 1.595 3  
1FSK 5.042 1  
1GCQ 3.826 1  
1GHQ -0.279 4  
1GLA 3.014 1  
1GP2 4.036 1  
1GPW 3.972 1  
1GRN 5.748 1  
1H1V 4.782 1  
1HE1 5.359 1  
1HE8 2.542 2  
1HIA 3.153 1  
1I2M 6.383 1  
1I4D 3.261 1  
1I9R 1.526 3  
1IB1 5.013 1  
1IBR 5.980 1  
1IJK 4.880 1  
1IQD 6.625 1  
1IRA 6.263 1  
1J2J 3.682 1  
1JMO 6.118 1  
1JPS 5.054 1  
1K4C 3.985 1  
1K5D 4.758 1  
1K74 5.496 1  
1KAC 4.126 1  
1KKL 2.860 2  
1KLU 2.860 2  
1KTZ 0.971 4  
1KXP 6.098 1  
1KXQ 6.225 1  
1M10 4.323 1  
1MAH 4.412 1  
1ML0 4.255 1  
1MLC 4.703 1  
1N2C 6.272 1

|      |       |   |
|------|-------|---|
| 1N80 | 3.478 | 1 |
| 1NCA | 3.751 | 1 |
| 1NSN | 3.516 | 1 |
| 1NW9 | 3.459 | 1 |
| 1OPH | 3.423 | 1 |
| 1PPE | 3.942 | 1 |
| 1PXV | 5.159 | 1 |
| 1QA9 | 1.813 | 3 |
| 1QFW | 3.231 | 1 |
| 1R0R | 4.690 | 1 |
| 1R8S | 5.895 | 1 |
| 1RLB | 2.274 | 2 |
| 1S1Q | 2.420 | 2 |
| 1SBB | 1.540 | 3 |
| 1T6B | 5.510 | 1 |
| 1UDI | 4.711 | 1 |
| 1VFB | 3.405 | 1 |
| 1WEJ | 3.905 | 1 |
| 1WQ1 | 4.629 | 1 |
| 1XD3 | 6.122 | 1 |
| 1XQS | 4.343 | 1 |
| 1Y64 | 2.086 | 2 |
| 1YVB | 4.179 | 1 |
| 1Z0K | 5.462 | 1 |
| 1Z5Y | 4.093 | 1 |
| 1ZHI | 2.495 | 2 |
| 2AJF | 4.587 | 1 |
| 2B42 | 5.636 | 1 |
| 2C0L | 6.465 | 1 |
| 2CFH | 5.631 | 1 |
| 2FD6 | 2.472 | 2 |
| 2H7V | 5.005 | 1 |
| 2HLE | 4.029 | 1 |
| 2HQS | 4.863 | 1 |
| 2HRK | 3.805 | 1 |
| 2I25 | 4.328 | 1 |
| 2JEL | 1.963 | 3 |
| 2MTA | 1.817 | 3 |
| 2NZ8 | 4.697 | 1 |
| 2O8V | 4.074 | 1 |
| 2O0B | 1.112 | 3 |
| 2OT3 | 6.061 | 1 |
| 2PCC | 1.679 | 3 |
| 2QFW | 2.828 | 2 |
| 2SIC | 2.217 | 2 |
| 2SNI | 5.063 | 1 |

2UUY 2.609 2  
2VIS 3.199 1  
7CEI 6.004 1  
design\_1 1.789 3  
design\_10 2.418 2  
design\_11 1.649 3  
design\_12 3.078 1  
design\_13 1.482 3  
design\_14 0.502 4  
design\_15 2.937 2  
design\_16 1.593 3  
design\_17 0.527 4  
design\_18 1.782 3  
design\_19 3.362 1  
design\_2 1.914 3  
design\_20 4.460 1  
design\_21 2.845 2  
design\_22 5.558 1  
design\_23 0.843 4  
design\_24 5.216 1  
design\_25 1.010 3  
design\_26 0.119 4  
design\_27 1.635 3  
design\_28 2.254 2  
design\_29 2.353 2  
design\_3 2.367 2  
design\_30 2.650 2  
design\_31 0.492 4  
design\_32 -0.539 4  
design\_33 3.391 1  
design\_34 2.674 2  
design\_35 2.632 2  
design\_36 2.195 2  
design\_37 4.719 1  
design\_38 4.285 1  
design\_39 1.023 3  
design\_4 1.489 3  
design\_40 1.520 3  
design\_41 2.040 2  
design\_42 0.927 4  
design\_43 1.867 3  
design\_44 3.287 1  
design\_45 2.754 2  
design\_46 1.849 3  
design\_47 2.157 2  
design\_48 2.663 2

design\_49 2.055 2  
design\_5 0.983 4  
design\_50 1.062 3  
design\_51 1.757 3  
design\_52 3.048 1  
design\_53 1.900 3  
design\_54 0.174 4  
design\_55 4.509 1  
design\_56 1.494 3  
design\_57 1.498 3  
design\_58 1.928 3  
design\_59 0.857 4  
design\_6 5.277 1  
design\_60 0.342 4  
design\_61 1.723 3  
design\_62 1.769 3  
design\_63 2.672 2  
design\_64 1.332 3  
design\_65 1.509 3  
design\_66 4.178 1  
design\_67 1.767 3  
design\_68 3.958 1  
design\_69 1.230 3  
design\_7 1.621 3  
design\_70 1.002 3  
design\_71 4.417 1  
design\_72 2.472 2  
design\_73 1.140 3  
design\_74 -0.789 4  
design\_75 4.101 1  
design\_77 3.115 1  
design\_78 1.297 3  
design\_79 0.303 4  
design\_8 3.577 1  
design\_80 0.842 4  
design\_81 2.026 2  
design\_82 4.704 1  
design\_83 3.047 1  
design\_84 4.070 1  
design\_85 3.140 1  
design\_86 1.662 3  
design\_87 1.207 3  
design\_9 1.656 3  
design\_76 0 5  
2HMI 0 5  
1DE4 0 5

\*\*\*\*\*

Group 6s-

The methodology used is as follows:

All 207 structures were redocked, globally with SwarmDock [1], and locally with PyRosetta [2]. Encounter complex formation and dissociation was simulated with BioSimz [1]. A number of metrics which characterise the results of these computations were derived. Numerous interface descriptors and binding energy terms were also calculated: the analytical continuum solvent (ACE) potential terms [3], DComplex [4], Rosetta energy terms [2], interface packing and surface complementarity scores [5], and generalised Born (GBSW) electrostatic and non-polar solvation energy [6]. Further parameters, describing interface flexibility and flexibility differences of core and periphery interface residues, were calculated using elastic network normal mode analysis [7], as well as counts of the number of residues with binding energies below various energy thresholds and the number of buried H-bond donors and acceptors. The distribution of these parameter values indicates that, compared to the designed, the benchmark complexes have a lower H-bond binding energy, fewer unsatisfied buried H-bond donors and acceptors, a more favourable change in ACE energy upon binding, and more favourable encounter complex formation dynamics. These parameters are sufficient to distinguish the benchmark and designed complexes, as a parameter set capable of binomial classification at 97.6% accuracy (95.7% accuracy with leave-one-out cross validation) was found, using a support vector machine with an analysis of variance kernel and a population-based forward greedy feature selection algorithm. However, as the designed complexes are not to be used in the discrimination of the two categories, the parameters were used in linear combination, in an energy function trained on empirically derived binding free energy values.

Dissociation constants for 95 complexes in the Benchmark 3.0 were manually amalgamated from the literature and empirical binding free energies were calculated. Linear regression of a number of parameter sets were performed, for which thresholds could be found to discriminate the benchmark complexes from the designed with between 70% and 90% accuracy. Values shown, in kcal/mol, correspond to an energy function composed of the following parameters, along with their relative importance (derived from normalised weights), where the first two parameters are boolean: Is SwarmDock top ranked structure under 5 Å rmsd to bound? (0.076), does the biggest SwarmDock cluster correspond to the bound? (0.009), Rosetta fine-grained pair potential (0.299), Rosetta coarse-grained pair potential (0.122), Van der Waals (0.192), BioSimz predicted kon constant (0.027), interface packing (0.181), surface complementarity (0.176), ACE self-solvation energy (0.780) and GBSW solvation energy (0.071). The regression has a RMS error of 2.76 and a correlation of 0.414, has an area-under-ROC

of 91.2% and can be used to correctly classify 88.4% of the complexes with a threshold of -9.55kcal/mol. Bins are chosen such that the 'binds' category contains complexes with predicted binding energies below -9.8 kcal/mol, and the cutoffs for the higher bins, likely to bind, uncertain, likely not to bind and don't bind, are chosen at intervals of 0.2 kcal/mol.

- [1] X. Li, I.H. Moal, and P.A. Bates, 'Detection and refinement of encounter complexes for protein-protein docking: Taking account of macromolecular crowding.' *Proteins* (2010), in press.
- [2] S. Chaudhury, S. Lyskov, and J.J. Gray, 'PyRosetta: a script-based interface for implementing custom molecular modeling algorithms using Rosetta.' *Bioinformatics*, 26(5):689-691 (2010).
- [3] M. Schaefer, and M. Karplus. 'A Comprehensive Analytical Treatment of Continuum Electrostatics.' *J. Phys. Chem.* 100:1578-1599 (1996).
- [4] S. Liu, C. Zhang, H. Zhou, and Y. Zhou, 'A physical reference state unifies the structure-derived potential of mean force for protein folding and binding.' *Proteins* 56, 93-101 (2004).
- [5] P. Mitra, and D. Pal, 'New measures for estimating surface complementarity and packing at protein-protein interfaces.' *FEBS Lett.* 584(6):1163-1168 (2010).
- [6] W. Im, M.S. Lee, and C.L. Brooks III, 'Generalized Born Model with a Simple Smoothing Function.' *J. Comput. Chem.* 24:1691-1702 (2003).
- [7] K. Suhre, and Y. H. Sanejouand, 'ElNemo: a normal mode web server for protein movement analysis and the generation of templates for molecular replacement.' *Nucleic Acids Res.* 32:610-614 (2004)

AUTHOR Iain Moal, Xiofan Li and Paul Bates

REMARK Binding scores for benchmark and designed protein-protein complexes.

REMARK

REMARK Scores are calculated using an energy function derived by linear regression of parameter values to 95 empirical binding free energies.

REMARK

REMARK Parameters used in regression (normalised relative weight):

REMARK 1) Is SwarmDock top ranked structure under 5Å rmsd to bound?

(0.076) - Boolean, 1 for true 0 for false

REMARK 2) Does the biggest SwarmDock cluster correspond to the bound?

(0.009) - Boolean, 1 for true 0 for false

REMARK 3) Rosetta fine-grained pair potential (0.299)

REMARK 4) Rosetta coarse-grained pair potential (0.122)

REMARK 5) Van der Waals (0.192)

REMARK 6) BioSimz predicted kon constant (0.027)

REMARK 7) Interface packing (0.181)

REMARK 8) Surface complementarity (0.176)

REMARK 9) ACE self-solvation energy (0.780)

REMARK 10)GBSW solvation energy (0.071)

REMARK



REMARK Normalised scores are categorised as follows:

REMARK 1)  $E \leq -9.8$

REMARK 2)  $-9.8 < E \leq -9.6$

REMARK 5)  $-9.6 < E \leq -9.4$

REMARK 3)  $-9.4 < E \leq -9.2$

REMARK 4)  $E > -9.2$

REMARK

REMARK NB) Only approximate BioSimz predicted kon constant are used for design\_81 to design\_87, however, as this is the parameter with

REMARK NB) the second least weight, the results are not expected to change significantly.

Raw scores are given in units of kcal/mol

|           | Raw score      | normalized score |
|-----------|----------------|------------------|
| design_1  | -9.18847791452 | 4                |
| design_2  | -8.90359639623 | 4                |
| design_3  | -9.53346129658 | 5                |
| design_4  | -8.99509329802 | 4                |
| design_5  | -11.1160282123 | 1                |
| design_6  | -8.03409371939 | 4                |
| design_7  | -8.38165944955 | 4                |
| design_8  | -9.02092503814 | 4                |
| design_9  | -8.4490811097  | 4                |
| design_10 | -8.7060972057  | 4                |
| design_11 | -8.69127425161 | 4                |
| design_12 | -9.43344956353 | 5                |
| design_13 | -9.46993229462 | 5                |
| design_14 | -8.3584442799  | 4                |
| design_15 | -9.1694760495  | 4                |
| design_16 | -9.01192198793 | 4                |
| design_17 | -7.97547194152 | 4                |
| design_18 | -8.9952521212  | 4                |
| design_19 | -9.35145292258 | 3                |
| design_20 | -9.50758680655 | 5                |
| design_21 | -9.29596879779 | 3                |
| design_22 | -9.05564697222 | 4                |
| design_23 | -8.80975493305 | 4                |
| design_24 | -9.75745007701 | 2                |
| design_25 | -8.19016971131 | 4                |
| design_26 | -8.97891832583 | 4                |
| design_27 | -8.71806843924 | 4                |
| design_28 | -9.08174636748 | 4                |
| design_29 | -8.66389305593 | 4                |
| design_30 | -8.89682585848 | 4                |
| design_31 | -9.3026178676  | 3                |
| design_32 | -9.19555060366 | 4                |

|           |                |   |
|-----------|----------------|---|
| design_33 | -8.95650861444 | 4 |
| design_34 | -9.15368481371 | 4 |
| design_35 | -8.97918368259 | 4 |
| design_36 | -9.4144038019  | 5 |
| design_37 | -9.46949466746 | 5 |
| design_38 | -9.07520631389 | 4 |
| design_39 | -8.60218399906 | 4 |
| design_40 | -9.32934161874 | 3 |
| design_41 | -8.71829504275 | 4 |
| design_42 | -9.00796015877 | 4 |
| design_43 | -8.20184781052 | 4 |
| design_44 | -9.47362184972 | 5 |
| design_45 | -9.09725518196 | 4 |
| design_46 | -8.90703349036 | 4 |
| design_47 | -9.00416910934 | 4 |
| design_48 | -8.42842829621 | 4 |
| design_49 | -7.79288107894 | 4 |
| design_50 | -8.49343245768 | 4 |
| design_51 | -8.82258900294 | 4 |
| design_52 | -8.55742439894 | 4 |
| design_53 | -8.48849308328 | 4 |
| design_54 | -8.01766134472 | 4 |
| design_55 | -8.71583845797 | 4 |
| design_56 | -8.64055336191 | 4 |
| design_57 | -9.4958680998  | 5 |
| design_58 | -9.20406749431 | 3 |
| design_59 | -8.96353222894 | 4 |
| design_60 | -9.11214229127 | 4 |
| design_61 | -8.86588904814 | 4 |
| design_62 | -8.71325025569 | 4 |
| design_63 | -9.25605667347 | 3 |
| design_64 | -8.56009756485 | 4 |
| design_65 | -8.08101953667 | 4 |
| design_66 | -8.97932930684 | 4 |
| design_67 | -8.56774802284 | 4 |
| design_68 | -9.25258583588 | 3 |
| design_69 | -8.33096156597 | 4 |
| design_70 | -9.32575008386 | 3 |
| design_71 | -9.05941459633 | 4 |
| design_72 | -9.24587238012 | 3 |
| design_73 | -8.85849303889 | 4 |
| design_74 | -8.6452449847  | 4 |
| design_75 | -9.01997121624 | 4 |
| design_76 | -8.89013182734 | 4 |
| design_77 | -9.33254682959 | 3 |
| design_78 | -9.01071452693 | 4 |

|           |                |   |
|-----------|----------------|---|
| design_79 | -8.69159256039 | 4 |
| design_80 | -8.39631598169 | 4 |
| design_81 | -8.89020746203 | 4 |
| design_82 | -9.19795167366 | 4 |
| design_83 | -8.93775736642 | 4 |
| design_84 | -9.15586042072 | 4 |
| design_85 | -8.49634235468 | 4 |
| design_86 | -8.16075244609 | 4 |
| design_87 | -8.87452852255 | 4 |
| 1A2K      | -10.275063058  | 1 |
| 1ACB      | -10.2183654111 | 1 |
| 1AHW      | -11.2102666632 | 1 |
| 1AK4      | -9.0828343192  | 4 |
| 1AKJ      | -10.5226412477 | 1 |
| 1AVX      | -10.5818443789 | 1 |
| 1AY7      | -10.1136271661 | 1 |
| 1AZS      | -8.34178999    | 4 |
| 1B6C      | -10.5623682722 | 1 |
| 1BGX      | -14.9875754209 | 1 |
| 1BJ1      | -9.98239458041 | 1 |
| 1BKD      | -10.7497003629 | 1 |
| 1BUH      | -9.66568201645 | 2 |
| 1BVK      | -10.3673967854 | 1 |
| 1BVN      | -13.7372119384 | 1 |
| 1CGI      | -11.4321081499 | 1 |
| 1D6R      | -10.8573208625 | 1 |
| 1DE4      | -10.0201579214 | 1 |
| 1DFJ      | -11.5751848188 | 1 |
| 1DQJ      | -11.3408099821 | 1 |
| 1E4K      | -9.06570648749 | 4 |
| 1E6J      | -10.4161197065 | 1 |
| 1E96      | -9.71066077559 | 2 |
| 1EAW      | -11.6090827615 | 1 |
| 1EER      | -12.6126903129 | 1 |
| 1EFN      | -9.17730136508 | 4 |
| 1EWY      | -9.84730782703 | 1 |
| 1EZU      | -11.0558805055 | 1 |
| 1F34      | -12.4945874221 | 1 |
| 1F51      | -10.9471529362 | 1 |
| 1FAK      | -11.2166354672 | 1 |
| 1FC2      | -8.79094254088 | 4 |
| 1FQ1      | -8.96748278164 | 4 |
| 1FQJ      | -11.0958967428 | 1 |
| 1FSK      | -10.5638670331 | 1 |
| 1GCQ      | -10.5283409126 | 1 |
| 1GHQ      | -8.52154556383 | 4 |

|      |                |   |
|------|----------------|---|
| 1GLA | -10.072399939  | 1 |
| 1GP2 | -10.1699546314 | 1 |
| 1GPW | -12.1809193139 | 1 |
| 1GRN | -10.7050797955 | 1 |
| 1H1V | -10.3078549362 | 1 |
| 1HE1 | -11.7284419433 | 1 |
| 1HE8 | -8.94531312806 | 4 |
| 1HIA | -11.1127406596 | 1 |
| 1I2M | -12.97461115   | 1 |
| 1I4D | -9.60927236477 | 2 |
| 1I9R | -10.6727705624 | 1 |
| 1IB1 | -10.1453398424 | 1 |
| 1IBR | -10.6473631407 | 1 |
| 1IJK | -9.19708093907 | 4 |
| 1IQD | -10.8649328652 | 1 |
| 1IRA | -13.0884686573 | 1 |
| 1J2J | -8.64093297969 | 4 |
| 1JMO | -11.8910036468 | 1 |
| 1JPS | -12.048482704  | 1 |
| 1K4C | -10.5874132993 | 1 |
| 1K5D | -12.2964912957 | 1 |
| 1K74 | -11.1923539505 | 1 |
| 1KAC | -10.0662375724 | 1 |
| 1KKL | -11.2978511503 | 1 |
| 1KLU | -9.76258421132 | 2 |
| 1KTZ | -8.90017335603 | 4 |
| 1KXP | -12.0068833669 | 1 |
| 1KXQ | -9.78420358877 | 2 |
| 1M10 | -10.3440294196 | 1 |
| 1MAH | -11.0898577128 | 1 |
| 1ML0 | -10.505824502  | 1 |
| 1MLC | -11.7047339005 | 1 |
| 1N2C | -10.7023203807 | 1 |
| 1N80 | -10.6544013178 | 1 |
| 1NCA | -10.3557025951 | 1 |
| 1NSN | -10.6317893406 | 1 |
| 1NW9 | -10.1455202765 | 1 |
| 1OPH | -11.0950020934 | 1 |
| 1PPE | -11.9646632573 | 1 |
| 1PXV | -11.0822465619 | 1 |
| 1QA9 | -9.04209226259 | 4 |
| 1QFW | -10.7161145683 | 1 |
| 1R0R | -10.1215092768 | 1 |
| 1R8S | -10.0877977653 | 1 |
| 1RLB | -9.58593521567 | 5 |
| 1S1Q | -9.7322508746  | 2 |

|      |                |   |
|------|----------------|---|
| 1SBB | -8.92111030215 | 4 |
| 1T6B | -11.2784602799 | 1 |
| 1UDI | -10.375196373  | 1 |
| 1VFB | -10.9874227752 | 1 |
| 1WEJ | -10.9501315928 | 1 |
| 1WQ1 | -13.2807760786 | 1 |
| 1XD3 | -10.7690797672 | 1 |
| 1XQS | -11.3118271685 | 1 |
| 1Y64 | -9.51011400679 | 5 |
| 1YVB | -10.200387327  | 1 |
| 1Z0K | -12.1231810162 | 1 |
| 1Z5Y | -9.75884887025 | 2 |
| 1ZHI | -9.08620707229 | 4 |
| 2AJF | -9.2991494347  | 3 |
| 2B42 | -12.330913126  | 1 |
| 2C0L | -10.8380933877 | 1 |
| 2CFH | -10.4758544886 | 1 |
| 2FD6 | -9.98429762422 | 1 |
| 2H7V | -9.42807159427 | 5 |
| 2HLE | -11.4682202574 | 1 |
| 2HMI | -9.10639175212 | 4 |
| 2HQS | -12.3529566062 | 1 |
| 2HRK | -9.69236170356 | 2 |
| 2I25 | -9.01165053107 | 4 |
| 2JEL | -10.6200361831 | 1 |
| 2MTA | -9.58760960782 | 5 |
| 2NZ8 | -12.2353126859 | 1 |
| 2O8V | -9.88539273253 | 1 |
| 2O0B | -7.76601892709 | 4 |
| 2OT3 | -11.3961113128 | 1 |
| 2PCC | -8.90654115711 | 4 |
| 2QFW | -9.92255933423 | 1 |
| 2SIC | -10.2127631578 | 1 |
| 2SNI | -10.2857777957 | 1 |
| 2UUY | -11.5157152076 | 1 |
| 2VIS | -9.48880947591 | 5 |
| 7CEI | -10.8595097025 | 1 |

\*\*\*\*\*

Group 7s -

REMARK Please use this file to submit your results for both designs and the docking benchmark

REMARK SCORING and DOCKING based on the Attract program (Zacharias, 2003) and the latest parameter set

REMARK

The raw score is a composite score in RT units (however, in principle an

arbitrary scale).

It is an "ad hoc" score (see comments below)

with the following 3 equally weighted contributions (each 33%):

1. Attract score of the energy minimized complex (in rotational and translational coordinates)
2. RMSD of the minimized complex from the start structure multiplied by 1 RT.
3. RANK of the solution closest to the "native" provided complex in a systematic search,  
if rank within top 10: 0 RT; if rank within 10-100: 6 RT; if rank within 100-1000: 12 RT;  
if rank > 1000: 18 RT.

Explanation of the composite raw score:

contribution 1:

Typically the Attract score for the minimized complex gives already an impression if the complex is favorable or not. However, often the score alone is not sufficient.

contribution 2:

For experimental complex structures the docking minimization typically yields an Rmsd (ligand) of < 1-3 Angstrom. Larger deviations indicate that the complex may not be stable.

This explains contribution 2 which increases with the Rmsd deviation of the minimized

complex from the provided "native" structure.

contribution 3:

For experimental complex structures (bound partners) a systematic ATTRACT search

typically gives the docking minimum closest to experiment as top ranking solution

or within the 10 best solutions.

If this is not the case it indicates that the complex is probably unrealistic.

To translate this into a score the rules given above (see 3.) were used.

The weights on this and the other contributions were not optimized.

Explanation of the normalized score:

Based on the score for the zdock-structures the following normalized score was derived.

1. raw score < -6 RT : normalized score: 1
2. -6 RT < raw score < -3 RT: normalized score: 2
3. -3 RT < raw score < 0 RT: normalized score: 3
4. raw score > 0 RT : normalized score: 4

(normalized score 5 was not needed)

For 90% of the ZdockRos-structures the raw score was better than -6, therefore a score better -6 was selected as best score(1). For very few Zdock-cases a score above zero was found, therefore 0 RT was chosen as the limit to distinguish non-binders (score 4). The -3 value (in between 0 and -6) was then chosen to distinguish between likely binders and likely non-binders.

| Name      | Score  | normalized score |
|-----------|--------|------------------|
| design_1  | -2.747 | 3                |
| design_2  | -0.399 | 3                |
| design_3  | -5.449 | 2                |
| design_4  | 0.541  | 4                |
| design_5  | -2.272 | 3                |
| design_6  | -4.624 | 2                |
| design_7  | -5.836 | 2                |
| design_8  | -4.434 | 2                |
| design_9  | 4.227  | 4                |
| design_10 | -2.460 | 3                |
| design_11 | 0.400  | 4                |
| design_12 | 5.986  | 4                |
| design_13 | -0.235 | 3                |
| design_14 | -0.059 | 3                |
| design_15 | -1.867 | 3                |
| design_16 | -6.147 | 1                |
| design_17 | 0.270  | 4                |
| design_18 | -2.451 | 3                |
| design_19 | -0.570 | 3                |
| design_20 | -7.385 | 1                |
| design_21 | -6.819 | 1                |
| design_22 | 1.427  | 4                |
| design_23 | 0.609  | 4                |
| design_24 | -2.746 | 3                |
| design_25 | 4.826  | 4                |
| design_26 | 4.015  | 4                |
| design_27 | 0.139  | 4                |
| design_28 | -1.989 | 3                |
| design_29 | -4.418 | 2                |
| design_30 | -6.494 | 1                |
| design_31 | -0.850 | 3                |
| design_32 | 4.619  | 4                |
| design_33 | -6.507 | 1                |
| design_34 | -6.983 | 1                |
| design_35 | -7.183 | 1                |

|           |        |   |
|-----------|--------|---|
| design_36 | -3.854 | 2 |
| design_37 | -6.227 | 1 |
| design_38 | -1.205 | 3 |
| design_39 | -5.414 | 2 |
| design_40 | -0.287 | 3 |
| design_41 | -0.204 | 3 |
| design_42 | 0.979  | 4 |
| design_43 | 3.251  | 4 |
| design_44 | -6.527 | 1 |
| design_45 | -2.642 | 3 |
| design_46 | -2.341 | 3 |
| design_47 | 4.405  | 4 |
| design_48 | 0.738  | 4 |
| design_49 | 1.390  | 4 |
| design_50 | -4.900 | 2 |
| design_51 | -3.394 | 2 |
| design_52 | -5.853 | 2 |
| design_53 | -4.270 | 2 |
| design_54 | 0.294  | 4 |
| design_55 | 1.463  | 4 |
| design_56 | 3.490  | 4 |
| design_57 | -6.050 | 1 |
| design_58 | -2.374 | 3 |
| design_59 | 1.077  | 4 |
| design_60 | -0.656 | 3 |
| design_61 | -6.335 | 1 |
| design_62 | -1.966 | 3 |
| design_63 | -0.563 | 3 |
| design_64 | 0.488  | 4 |
| design_65 | -2.261 | 3 |
| design_66 | -2.292 | 3 |
| design_67 | -2.381 | 3 |
| design_68 | 1.357  | 4 |
| design_69 | 1.180  | 4 |
| design_70 | 1.207  | 4 |
| design_71 | -2.962 | 3 |
| design_72 | -0.009 | 3 |
| design_73 | 4.079  | 4 |
| design_74 | 0.346  | 4 |
| design_75 | 0.833  | 4 |
| design_76 | 2.575  | 4 |
| design_77 | -8.187 | 1 |
| design_78 | 3.876  | 4 |
| design_79 | 1.079  | 4 |
| design_80 | -1.987 | 3 |
| design_81 | -5.605 | 2 |



|           |         |   |
|-----------|---------|---|
| design_82 | -4.595  | 2 |
| design_83 | -3.283  | 2 |
| design_84 | -2.882  | 3 |
| design_85 | -5.220  | 2 |
| design_86 | 4.174   | 4 |
| design_87 | 0.101   | 4 |
| 1A2K      | -6.321  | 1 |
| 1ACB      | -6.996  | 1 |
| 1AHW      | -4.976  | 2 |
| 1AK4      | -5.454  | 2 |
| 1AKJ      | -5.448  | 2 |
| 1AVX      | -8.259  | 1 |
| 1AY7      | -6.477  | 1 |
| 1B6C      | -8.575  | 1 |
| 1BGX      | 10.935  | 4 |
| 1BJ1      | -9.213  | 1 |
| 1BUH      | -5.946  | 2 |
| 1BVK      | -4.811  | 2 |
| 1BVN      | -10.123 | 1 |
| 1CGI      | -9.999  | 1 |
| 1D6R      | -6.012  | 1 |
| 1DFJ      | -9.378  | 1 |
| 1DQJ      | -2.670  | 3 |
| 1E6J      | -6.204  | 1 |
| 1E96      | -5.402  | 2 |
| 1EAW      | -8.036  | 1 |
| 1EER      | -10.104 | 1 |
| 1EWY      | -2.547  | 3 |
| 1EZU      | -9.034  | 1 |
| 1F34      | -10.301 | 1 |
| 1F51      | -8.284  | 1 |
| 1FAK      | -9.558  | 1 |
| 1FC2      | -6.888  | 1 |
| 1FQ1      | -7.326  | 1 |
| 1FQJ      | -6.584  | 1 |
| 1FSK      | -9.068  | 1 |
| 1GCQ      | -6.152  | 1 |
| 1GHQ      | 4.752   | 4 |
| 1GP2      | 8.600   | 4 |
| 1GRN      | -5.536  | 2 |
| 1H1V      | -6.606  | 1 |
| 1HE1      | -7.709  | 1 |
| 1HE8      | -4.742  | 2 |
| 1HIA      | -8.009  | 1 |
| 1I2M      | -11.764 | 1 |
| 1I4D      | -5.437  | 2 |

|      |         |   |
|------|---------|---|
| 1I9R | -5.219  | 2 |
| 1IB1 | -6.463  | 1 |
| 1IBR | -8.702  | 1 |
| 1IJK | -8.250  | 1 |
| 1IQD | -8.894  | 1 |
| 1JPS | -6.587  | 1 |
| 1K4C | -9.340  | 1 |
| 1K5D | -8.850  | 1 |
| 1KAC | -2.987  | 3 |
| 1KKL | -3.923  | 2 |
| 1KLU | -6.556  | 1 |
| 1KTZ | 0.150   | 4 |
| 1KXP | -10.275 | 1 |
| 1KXQ | -8.892  | 1 |
| 1M10 | -7.046  | 1 |
| 1MAH | -5.416  | 2 |
| 1ML0 | -8.528  | 1 |
| 1MLC | -7.011  | 1 |
| 1NCA | -6.676  | 1 |
| 1NSN | -6.175  | 1 |
| 1PPE | -7.949  | 1 |
| 1QA9 | -5.620  | 2 |
| 1QFW | -6.474  | 1 |
| 1RLB | -5.003  | 2 |
| 1SBB | -6.689  | 1 |
| 1UDI | -8.005  | 1 |
| 1VFB | -5.916  | 2 |
| 1WEJ | -6.251  | 1 |
| 1WQ1 | -8.203  | 1 |
| 2HMI | 1.205   | 4 |
| 2JEL | -2.858  | 3 |
| 2MTA | -5.381  | 2 |
| 2PCC | -4.399  | 2 |
| 2QFW | -4.939  | 2 |
| 2SIC | -6.522  | 1 |
| 2SNI | -6.936  | 1 |
| 2VIS | -6.881  | 1 |
| 7CEI | -7.346  | 1 |
| 1J2J | -6.502  | 1 |
| 1IRA | -7.371  | 1 |
| 1GPW | -8.412  | 1 |
| 1GLA | -5.672  | 2 |
| 1EFN | -6.669  | 1 |
| 1E4K | -9.030  | 1 |
| 1BKD | -12.488 | 1 |
| 1AZS | -5.541  | 2 |

|      |         |   |
|------|---------|---|
| 1Y64 | -1.486  | 3 |
| 1XQS | -9.550  | 1 |
| 1XD3 | -9.347  | 1 |
| 1T6B | -8.539  | 1 |
| 1S1Q | -4.546  | 2 |
| 1R8S | -11.162 | 1 |
| 1R0R | -7.745  | 1 |
| 1PXV | -9.064  | 1 |
| 1OPH | -7.386  | 1 |
| 1NW9 | -8.139  | 1 |
| 1N80 | -8.008  | 1 |
| 1K74 | -9.422  | 1 |
| 1JMO | -11.997 | 1 |
| 2CFH | -11.982 | 1 |
| 2C0L | -7.075  | 1 |
| 2B42 | -10.218 | 1 |
| 2AJF | -6.726  | 1 |
| 1ZHI | -5.657  | 2 |
| 1Z5Y | -6.606  | 1 |
| 1Z0K | -7.493  | 1 |
| 1YVB | -5.075  | 2 |
| 2UUY | -6.285  | 1 |
| 2OT3 | -6.230  | 1 |
| 200B | -4.744  | 2 |
| 208V | -7.387  | 1 |
| 2NZ8 | -9.034  | 1 |
| 2I25 | -7.277  | 1 |
| 2HRK | -5.792  | 2 |
| 2HQS | -8.530  | 1 |
| 2HLE | -4.988  | 2 |
| 2H7V | -5.725  | 2 |
| 2FD6 | -6.011  | 1 |

\*\*\*\*\*

Group 8s-

Description of binding affinity prediction by Seok group

We used the summation of seven energy terms to predict binding affinities for target complexes. These terms are : 1) DFIRE, 2) Van der Waals (CHARMM19), 3) Electrostatics (CHARMM19), 4) Solvation term described by Atomic Solvation Parameter, 5) Hydrogen bonding, 6) Sequence conservation score derived from psi-BLAST search, and 7) sidechain entropy. Among the seven terms, majorly contributing terms are 6) and 7). We optimized the weights and decided the cut for binding status by training on 107 training targets. The training set consists of 74 protein-protein complexes with known binding affinity values, and 33 complexes from CAPRI round 20.

|      |         |   |
|------|---------|---|
| 1A2K | -18.747 | 1 |
| 1ACB | -23.776 | 1 |
| 1AHW | -3.555  | 3 |
| 1AK4 | -27.775 | 1 |
| 1AKJ | -8.133  | 1 |
| 1AVX | -28.542 | 1 |
| 1AY7 | -10.276 | 1 |
| 1B6C | -16.927 | 1 |
| 1BJ1 | -0.770  | 4 |
| 1BUH | -13.678 | 1 |
| 1BVK | -2.393  | 3 |
| 1BVN | -4.387  | 3 |
| 1CGI | -30.534 | 1 |
| 1D6R | -28.268 | 1 |
| 1DFJ | -11.772 | 1 |
| 1DQJ | -0.909  | 4 |
| 1E6J | -6.281  | 2 |
| 1E96 | -4.803  | 3 |
| 1EAW | -35.873 | 1 |
| 1EER | -9.400  | 1 |
| 1EWY | -9.480  | 1 |
| 1EZU | -47.098 | 1 |
| 1F34 | -14.319 | 1 |
| 1F51 | -20.290 | 1 |
| 1FAK | -13.375 | 1 |
| 1FC2 | 3.715   | 5 |
| 1FQ1 | -22.194 | 1 |
| 1FQJ | -4.032  | 3 |
| 1FSK | -3.166  | 3 |
| 1GCQ | -17.096 | 1 |
| 1GHQ | 3.574   | 5 |
| 1GP2 | -15.658 | 1 |
| 1GRN | -37.985 | 1 |
| 1H1V | -6.732  | 2 |
| 1HE1 | -14.631 | 1 |
| 1HE8 | -7.116  | 2 |
| 1HIA | -22.160 | 1 |
| 1I4D | -9.660  | 1 |
| 1I9R | 2.201   | 5 |
| 1IB1 | -11.395 | 1 |
| 1IBR | -13.157 | 1 |
| 1IJK | -2.784  | 3 |
| 1IQD | 4.438   | 5 |
| 1JPS | -2.501  | 3 |
| 1K4C | 4.928   | 5 |
| 1K5D | -19.666 | 1 |

|      |         |   |
|------|---------|---|
| 1KAC | -0.542  | 4 |
| 1KKL | -11.932 | 1 |
| 1KLU | 4.555   | 5 |
| 1KTZ | -2.760  | 3 |
| 1KXQ | -15.266 | 1 |
| 1MAH | -0.213  | 4 |
| 1ML0 | -6.801  | 2 |
| 1MLC | -0.867  | 4 |
| 1NCA | -3.634  | 3 |
| 1NSN | -0.525  | 4 |
| 1PPE | -34.648 | 1 |
| 1QA9 | 2.092   | 5 |
| 1QFW | -6.720  | 2 |
| 1RLB | 2.108   | 5 |
| 1SBB | 2.632   | 5 |
| 1UDI | -12.733 | 1 |
| 1VFB | -2.439  | 3 |
| 1WEJ | 0.894   | 5 |
| 1WQ1 | -14.811 | 1 |
| 2JEL | -4.656  | 3 |
| 2MTA | -3.463  | 3 |
| 2PCC | -3.600  | 3 |
| 2QFW | 0.231   | 5 |
| 2SIC | -35.559 | 1 |
| 2SNI | -36.302 | 1 |
| 2VIS | -3.171  | 3 |
| 7CEI | -12.489 | 1 |
| 1AZS | 2.298   | 5 |
| 1BKD | -22.274 | 1 |
| 1E4K | 2.566   | 5 |
| 1EFN | -15.374 | 1 |
| 1GLA | -2.936  | 3 |
| 1GPW | -37.691 | 1 |
| 1IRA | -1.699  | 3 |
| 1J2J | -8.149  | 1 |
| 1JMO | -28.669 | 1 |
| 1N80 | -28.536 | 1 |
| 1NW9 | -11.036 | 1 |
| 1OPH | -27.931 | 1 |
| 1PXV | -4.253  | 3 |
| 1R0R | -39.597 | 1 |
| 1S1Q | -10.807 | 1 |
| 1T6B | -2.305  | 3 |
| 1XD3 | -19.724 | 1 |
| 1XQS | -22.027 | 1 |
| 1Y64 | -16.096 | 1 |

|           |         |   |
|-----------|---------|---|
| 1YVB      | -20.774 | 1 |
| 1Z0K      | -23.489 | 1 |
| 1Z5Y      | -8.574  | 1 |
| 1ZHI      | 4.822   | 5 |
| 2AJF      | 3.424   | 5 |
| 2B42      | -13.184 | 1 |
| 2C0L      | -1.373  | 3 |
| 2CFH      | -17.249 | 1 |
| 2FD6      | -2.016  | 3 |
| 2H7V      | -13.479 | 1 |
| 2HLE      | -6.383  | 2 |
| 2HQS      | -1.341  | 3 |
| 2HRK      | -5.000  | 3 |
| 2NZ8      | -25.642 | 1 |
| 2O8V      | -26.730 | 1 |
| 2O0B      | -14.595 | 1 |
| 2OT3      | -30.039 | 1 |
| 2UUY      | -25.015 | 1 |
| design_1  | -5.951  | 3 |
| design_2  | -2.747  | 3 |
| design_3  | 2.804   | 5 |
| design_4  | -2.453  | 3 |
| design_5  | -1.898  | 3 |
| design_6  | -2.740  | 3 |
| design_7  | -0.840  | 4 |
| design_8  | -----   | 3 |
| design_9  | -0.289  | 4 |
| design_10 | -0.097  | 4 |
| design_11 | -7.228  | 2 |
| design_12 | -5.822  | 3 |
| design_13 | -3.284  | 3 |
| design_14 | -0.361  | 4 |
| design_15 | -4.008  | 3 |
| design_16 | 0.977   | 5 |
| design_17 | -0.797  | 4 |
| design_18 | -2.915  | 3 |
| design_19 | -4.126  | 3 |
| design_20 | -----   | 3 |
| design_21 | -2.755  | 3 |
| design_22 | -6.543  | 2 |
| design_23 | 2.045   | 5 |
| design_24 | -3.027  | 3 |
| design_25 | -0.494  | 4 |
| design_26 | -1.734  | 3 |
| design_27 | -0.596  | 4 |
| design_28 | -3.114  | 3 |

|           |         |   |
|-----------|---------|---|
| design_29 | -----   | 3 |
| design_30 | -2.867  | 3 |
| design_31 | -2.742  | 3 |
| design_32 | 1.620   | 5 |
| design_33 | -2.496  | 3 |
| design_34 | -10.118 | 1 |
| design_35 | -2.371  | 3 |
| design_36 | -0.820  | 4 |
| design_37 | -9.623  | 1 |
| design_38 | -----   | 3 |
| design_39 | -0.238  | 4 |
| design_40 | 3.098   | 5 |
| design_41 | 0.348   | 5 |
| design_42 | 0.761   | 5 |
| design_43 | -7.267  | 2 |
| design_44 | -0.847  | 4 |
| design_45 | -3.267  | 3 |
| design_46 | 1.378   | 5 |
| design_47 | -1.712  | 3 |
| design_48 | -1.785  | 3 |
| design_49 | -0.850  | 4 |
| design_50 | -1.417  | 3 |
| design_51 | -2.579  | 3 |
| design_52 | 0.941   | 5 |
| design_53 | -4.495  | 3 |
| design_54 | 3.175   | 5 |
| design_55 | -----   | 3 |
| design_56 | -2.146  | 3 |
| design_57 | 2.247   | 5 |
| design_58 | -2.937  | 3 |
| design_59 | 1.588   | 5 |
| design_60 | -2.037  | 3 |
| design_61 | -1.541  | 3 |
| design_62 | -----   | 3 |
| design_63 | -2.148  | 3 |
| design_64 | -1.893  | 3 |
| design_65 | -7.947  | 2 |
| design_66 | -2.607  | 3 |
| design_67 | 1.125   | 5 |
| design_68 | -----   | 3 |
| design_69 | -0.890  | 4 |
| design_70 | -1.757  | 3 |
| design_71 | -2.584  | 3 |
| design_72 | -6.317  | 2 |
| design_73 | -4.915  | 3 |
| design_74 | 0.623   | 5 |

|           |        |   |
|-----------|--------|---|
| design_75 | -5.499 | 3 |
| design_76 | -1.998 | 3 |
| design_77 | -7.990 | 2 |
| design_78 | -0.173 | 4 |
| design_79 | 0.779  | 5 |
| design_80 | -1.398 | 3 |
| design_81 | -2.353 | 3 |
| design_82 | -0.473 | 4 |
| design_83 | -----  | 3 |
| design_84 | -2.562 | 3 |
| design_85 | -4.046 | 3 |
| design_86 | 2.629  | 5 |
| design_87 | -1.741 | 3 |

\*\*\*\*\*

Group 9s-

|           |              |   |
|-----------|--------------|---|
| design_1  | 1328.472248  | 2 |
| design_2  | 1699.993332  | 1 |
| design_3  | 1053.0764395 | 5 |
| design_4  | 1559.4020535 | 1 |
| design_5  | 893.4992255  | 3 |
| design_6  | 249.5758305  | 4 |
| design_7  | 1216.90549   | 2 |
| design_8  | 112.7288585  | 4 |
| design_9  | 1430.0492485 | 1 |
| design_10 | 1464.363524  | 1 |
| design_11 | 1223.0122015 | 2 |
| design_12 | 1493.826892  | 1 |
| design_13 | 1259.1848265 | 2 |
| design_14 | 280.3333175  | 4 |
| design_15 | -36.6327865  | 4 |
| design_16 | 1620.8225525 | 1 |
| design_17 | 963.168257   | 3 |
| design_18 | 1768.8445685 | 1 |
| design_19 | 1032.6960525 | 3 |
| design_20 | 1080.209282  | 5 |
| design_21 | 2018.5712855 | 1 |
| design_22 | 1193.295454  | 2 |
| design_23 | -244.314628  | 4 |
| design_24 | 579.629499   | 4 |
| design_25 | 1340.718613  | 2 |
| design_26 | 1725.329886  | 1 |
| design_27 | 1340.742324  | 2 |
| design_28 | 372.000453   | 4 |
| design_29 | 1315.6461785 | 2 |
| design_30 | 1223.930668  | 2 |
| design_31 | 1619.4905515 | 1 |



|           |              |   |
|-----------|--------------|---|
| design_32 | 1140.4131215 | 2 |
| design_33 | 538.5939025  | 4 |
| design_34 | 1416.1282385 | 1 |
| design_35 | 1168.370939  | 2 |
| design_36 | 2192.7292525 | 1 |
| design_37 | 493.8319465  | 4 |
| design_38 | 481.976658   | 4 |
| design_39 | 1356.5584235 | 2 |
| design_40 | 1686.3124085 | 1 |
| design_41 | 1870.5353675 | 1 |
| design_42 | 1623.995228  | 1 |
| design_43 | 837.58206    | 3 |
| design_44 | 1784.554693  | 1 |
| design_45 | 1277.607559  | 2 |
| design_46 | 1761.273977  | 1 |
| design_47 | 1087.553829  | 5 |
| design_48 | 1291.976514  | 2 |
| design_49 | 676.582184   | 4 |
| design_50 | 1790.314023  | 1 |
| design_51 | 1277.819837  | 2 |
| design_52 | 1488.459639  | 1 |
| design_53 | 1751.588266  | 1 |
| design_54 | 1045.3972085 | 3 |
| design_55 | 874.91772    | 3 |
| design_56 | 967.895314   | 3 |
| design_57 | 1192.93213   | 2 |
| design_58 | 1243.3860185 | 2 |
| design_59 | 1027.834711  | 3 |
| design_60 | 666.080163   | 4 |
| design_61 | 701.789183   | 4 |
| design_62 | -453.710239  | 4 |
| design_63 | 1061.2640785 | 5 |
| design_64 | 1095.798401  | 5 |
| design_65 | 1861.4412405 | 1 |
| design_66 | 1046.177019  | 3 |
| design_67 | 687.3474515  | 4 |
| design_68 | 562.14345    | 4 |
| design_69 | 1438.1867145 | 1 |
| design_70 | 1991.779078  | 1 |
| design_71 | 544.4980855  | 4 |
| design_72 | 1200.5068885 | 2 |
| design_73 | 1540.2511645 | 1 |
| design_74 | 882.2291155  | 3 |
| design_75 | 526.3083165  | 4 |
| design_76 | 1737.931004  | 1 |
| design_77 | 1261.7450775 | 2 |

|           |              |   |
|-----------|--------------|---|
| design_78 | 324.6881045  | 4 |
| design_79 | 1352.357525  | 2 |
| design_80 | 1145.883502  | 2 |
| design_81 | 1261.180428  | 2 |
| design_82 | 424.3608515  | 4 |
| design_83 | 616.1022775  | 4 |
| design_84 | 936.61514    | 3 |
| design_85 | 1714.6203865 | 1 |
| design_86 | 1085.606216  | 5 |
| design_87 | 1269.10754   | 2 |
| 1A2K      | 1335.437024  | 2 |
| 1ACB      | 604.647362   | 4 |
| 1AHW      | 1622.7856285 | 1 |
| 1AK4      | 695.493178   | 4 |
| 1AKJ      | 1062.0314255 | 5 |
| 1AVX      | 1222.9661515 | 2 |
| 1AY7      | 711.4922745  | 4 |
| 1B6C      | 1270.1634225 | 2 |
| 1BGX      | 1301.4810185 | 2 |
| 1BJ1      | 1310.6502635 | 2 |
| 1BUH      | 989.000633   | 3 |
| 1BVK      | 359.3838785  | 4 |
| 1BVN      | 1211.214479  | 2 |
| 1CGI      | 1051.46922   | 5 |
| 1D6R      | 1143.3531575 | 2 |
| 1DE4      | 1076.3951315 | 5 |
| 1DFJ      | 1430.2921935 | 1 |
| 1DQJ      | 35.50468     | 4 |
| 1E6J      | 351.2199145  | 4 |
| 1E96      | 840.3110935  | 3 |
| 1EAW      | -58.5760055  | 4 |
| 1EER      | 1452.606524  | 1 |
| 1EWY      | 578.811475   | 4 |
| 1EZU      | 1775.4820425 | 1 |
| 1F34      | 1081.874449  | 5 |
| 1F51      | 1146.480521  | 2 |
| 1FAK      | 1374.7883325 | 2 |
| 1FC2      | 1820.2148725 | 1 |
| 1FQ1      | 1205.5096705 | 2 |
| 1FQJ      | 1506.4572585 | 1 |
| 1FSK      | 835.0396205  | 3 |
| 1GCQ      | 995.3567515  | 3 |
| 1GHQ      | 226.475282   | 4 |
| 1GP2      | 1659.612069  | 1 |
| 1GRN      | 1280.439304  | 2 |
| 1H1V      | 1459.651467  | 1 |

|      |              |   |
|------|--------------|---|
| 1HE1 | 1372.215343  | 2 |
| 1HE8 | 1503.1912055 | 1 |
| 1HIA | 814.492202   | 3 |
| 1I2M | 1471.383521  | 1 |
| 1I4D | 1243.923859  | 2 |
| 1I9R | 1434.146759  | 1 |
| 1IB1 | 1200.050316  | 2 |
| 1IBR | 2182.189563  | 1 |
| 1IJK | 1880.3918955 | 1 |
| 1IQD | 1343.294609  | 2 |
| 1JPS | 1634.441768  | 1 |
| 1K4C | 625.090973   | 4 |
| 1K5D | 1139.4431365 | 2 |
| 1KAC | 295.3325785  | 4 |
| 1KKL | 1666.900958  | 1 |
| 1KLU | 1491.609623  | 1 |
| 1KTZ | 404.674222   | 4 |
| 1KXP | 1473.2530195 | 1 |
| 1KXQ | 1093.750023  | 5 |
| 1M10 | 1599.9807525 | 1 |
| 1MAH | 1043.569863  | 3 |
| 1ML0 | 1340.537023  | 2 |
| 1MLC | -191.178702  | 4 |
| 1N2C | 2036.059859  | 1 |
| 1NCA | 1137.4558835 | 2 |
| 1NSN | 1433.5818825 | 1 |
| 1PPE | 1140.3962415 | 2 |
| 1QA9 | 474.6158225  | 4 |
| 1QFW | 1017.656891  | 3 |
| 1RLB | 1517.3591    | 1 |
| 1SBB | 696.839352   | 4 |
| 1UDI | 791.5695545  | 4 |
| 1VFB | 188.5126445  | 4 |
| 1WEJ | 112.654061   | 4 |
| 1WQ1 | 741.2637235  | 4 |
| 2HMI | 1118.004212  | 5 |
| 2JEL | 256.0743985  | 4 |
| 2MTA | 1497.6760665 | 1 |
| 2PCC | 1018.1470635 | 3 |
| 2QFW | 75.026882    | 4 |
| 2SIC | 95.0830075   | 4 |
| 2SNI | 384.5356275  | 4 |
| 2VIS | 946.3250525  | 3 |
| 7CEI | 1148.89921   | 2 |
| 1AZS | 696.150993   | 4 |
| 1BKD | 1388.759769  | 1 |

|      |              |   |
|------|--------------|---|
| 1E4K | 534.4921685  | 4 |
| 1EFN | 913.18677    | 3 |
| 1GLA | 852.858011   | 3 |
| 1GPW | 1576.253632  | 1 |
| 1IRA | 1404.301882  | 1 |
| 1J2J | 951.824363   | 3 |
| 1JMO | 1387.9643415 | 1 |
| 1K74 | 1015.4459045 | 3 |
| 1N80 | 1253.980597  | 2 |
| 1NW9 | 1266.5824785 | 2 |
| 1OPH | 1285.4560355 | 2 |
| 1PXV | 1206.5204185 | 2 |
| 1R0R | 1065.608054  | 5 |
| 1R8S | 762.5862205  | 4 |
| 1S1Q | 1095.34908   | 5 |
| 1T6B | 753.39242    | 4 |
| 1XD3 | 1125.987736  | 2 |
| 1XQS | 1228.974929  | 2 |
| 1Y64 | 1165.3553045 | 2 |
| 1YVB | 1432.0895365 | 1 |
| 1Z0K | 985.529208   | 3 |
| 1Z5Y | 1195.432284  | 2 |
| 1ZHI | 1374.6161765 | 2 |
| 2AJF | 1469.6154555 | 1 |
| 2B42 | 1047.832506  | 5 |
| 2C0L | 1151.207707  | 2 |
| 2CFH | 810.2423385  | 3 |
| 2FD6 | 936.4258805  | 3 |
| 2H7V | 164.3794945  | 4 |
| 2HLE | 949.8513385  | 3 |
| 2HQS | 876.4077885  | 3 |
| 2HRK | 1106.100849  | 5 |
| 2I25 | 765.8729325  | 4 |
| 2NZ8 | 1388.590404  | 1 |
| 2O8V | 83.6445115   | 4 |
| 2O0B | 1002.5640695 | 3 |
| 2OT3 | 1230.8058315 | 2 |
| 2UUY | 921.4620505  | 3 |

\*\*\*\*\*

Group 10s-

Raw Scores are given in units of : DiffColl  
diffColl normalized score

|          |         |   |
|----------|---------|---|
| design_1 | -0.2581 | 3 |
| design_2 | -0.5671 | 4 |
| design_3 | -0.4627 | 4 |

|           |         |   |
|-----------|---------|---|
| design_4  | -0.2946 | 3 |
| design_5  | -0.3527 | 4 |
| design_6  | -0.3215 | 3 |
| design_7  | -0.3447 | 3 |
| design_8  | 0.1557  | 1 |
| design_9  | -0.6527 | 4 |
| design_10 | -0.5841 | 4 |
| design_11 | -0.6399 | 4 |
| design_12 | 0.2263  | 1 |
| design_13 | -0.2262 | 2 |
| design_14 | -0.2295 | 2 |
| design_15 | 0.3292  | 1 |
| design_16 | -0.4214 | 4 |
| design_17 | -0.1543 | 2 |
| design_18 | -0.7460 | 4 |
| design_19 | -0.3719 | 4 |
| design_20 | 0.3056  | 1 |
| design_21 | -0.6873 | 4 |
| design_22 | 0.0409  | 1 |
| design_23 | -0.5125 | 4 |
| design_24 | -0.3215 | 3 |
| design_25 | -0.6884 | 4 |
| design_26 | -0.6986 | 4 |
| design_27 | -0.6514 | 4 |
| design_28 | 0.3845  | 1 |
| design_29 | -0.4209 | 4 |
| design_30 | -0.2556 | 3 |
| design_31 | -0.7648 | 4 |
| design_32 | 0.4645  | 1 |
| design_33 | 0.1052  | 1 |
| design_34 | -0.5747 | 4 |
| design_35 | -0.7767 | 4 |
| design_36 | -0.6654 | 4 |
| design_37 | -0.1153 | 2 |
| design_38 | -0.3244 | 3 |
| design_39 | -0.2495 | 3 |
| design_40 | -0.7164 | 4 |
| design_41 | -0.2802 | 3 |
| design_42 | 0.0344  | 1 |
| design_43 | -0.2816 | 3 |
| design_44 | -0.2960 | 3 |
| design_45 | -0.5713 | 4 |
| design_46 | -0.2371 | 2 |
| design_47 | -0.7723 | 4 |
| design_48 | -0.6787 | 4 |
| design_49 | -0.4731 | 4 |

|           |         |   |
|-----------|---------|---|
| design_50 | -0.7051 | 4 |
| design_51 | -0.1828 | 2 |
| design_52 | -0.4572 | 4 |
| design_53 | -0.5726 | 4 |
| design_54 | -0.3768 | 4 |
| design_55 | 0.3509  | 1 |
| design_56 | -0.3345 | 3 |
| design_57 | -0.7325 | 4 |
| design_58 | -0.2749 | 3 |
| design_59 | -0.6231 | 4 |
| design_60 | -0.6599 | 4 |
| design_61 | -0.7143 | 4 |
| design_62 | 0.1569  | 1 |
| design_63 | -0.3797 | 4 |
| design_64 | -0.1134 | 2 |
| design_65 | -0.7274 | 4 |
| design_66 | -0.7278 | 4 |
| design_67 | -0.8605 | 4 |
| design_68 | -0.8605 | 4 |
| design_69 | -0.3513 | 4 |
| design_70 | -0.6295 | 4 |
| design_71 | 0.4496  | 1 |
| design_72 | -0.7738 | 4 |
| design_73 | -0.7418 | 4 |
| design_74 | -0.4251 | 4 |
| design_75 | 0.0083  | 1 |
| design_76 | 0.0639  | 1 |
| design_77 | -0.7267 | 4 |
| design_78 | -0.7178 | 4 |
| design_79 | -0.3277 | 3 |
| design_80 | -0.6533 | 4 |
| design_81 | -0.6808 | 4 |
| design_82 | -0.0582 | 2 |
| design_83 | 0.3695  | 1 |
| design_84 | 0.1804  | 1 |
| design_85 | -0.4932 | 4 |
| design_86 | -0.3001 | 3 |
| design_87 | -0.0561 | 2 |
| 1A2K      | -0.1070 | 2 |
| 1ACB      | 0.0476  | 1 |
| 1AHW      | 0.1762  | 1 |
| 1AK4      | 0.1611  | 1 |
| 1AKJ      | 0.1474  | 1 |
| 1AVX      | 0.0054  | 1 |
| 1AY7      | 0.1313  | 1 |
| 1AZS      | -0.0705 | 2 |

|      |         |   |
|------|---------|---|
| 1B6C | -0.3083 | 3 |
| 1BGX | -0.6450 | 4 |
| 1BJ1 | 0.1561  | 1 |
| 1BKD | 0.6381  | 1 |
| 1BUH | -0.2183 | 2 |
| 1BVK | -0.0572 | 2 |
| 1BVN | 0.3466  | 1 |
| 1CGI | 0.2104  | 1 |
| 1D6R | 0.3639  | 1 |
| 1DE4 | -0.3896 | 4 |
| 1DFJ | 0.5268  | 1 |
| 1DQJ | -0.5251 | 4 |
| 1E4K | 0.2389  | 1 |
| 1E6J | 0.0998  | 1 |
| 1E96 | 0.4086  | 1 |
| 1EAW | 0.5646  | 1 |
| 1EER | 0.9570  | 1 |
| 1EFN | 0.1434  | 1 |
| 1EWY | -0.4846 | 4 |
| 1EZU | 0.9044  | 1 |
| 1F34 | 0.0774  | 1 |
| 1F51 | -0.9179 | 4 |
| 1FAK | 0.4781  | 1 |
| 1FC2 | 0.4703  | 1 |
| 1FQ1 | 0.2499  | 1 |
| 1FQJ | 0.2027  | 1 |
| 1FSK | -0.4218 | 4 |
| 1GCQ | 0.3377  | 1 |
| 1GHQ | 0.4767  | 1 |
| 1GLA | 0.0429  | 1 |
| 1GP2 | 0.0848  | 1 |
| 1GPW | 0.3260  | 1 |
| 1GRN | -0.0098 | 2 |
| 1H1V | -0.1782 | 2 |
| 1HE1 | 0.0360  | 1 |
| 1HE8 | 0.4661  | 1 |
| 1HIA | 0.9399  | 1 |
| 1I2M | -0.2378 | 2 |
| 1I4D | 0.9621  | 1 |
| 1I9R | -0.8740 | 4 |
| 1IB1 | -0.5439 | 4 |
| 1IBR | 0.9775  | 1 |
| 1IJK | 0.6027  | 1 |
| 1IQD | -0.6046 | 4 |
| 1IRA | -0.7545 | 4 |
| 1J2J | 0.9250  | 1 |

|      |         |   |
|------|---------|---|
| 1JMO | -0.7572 | 4 |
| 1JPS | 0.1550  | 1 |
| 1K4C | 0.3124  | 1 |
| 1K5D | -0.2643 | 3 |
| 1K74 | 0.1774  | 1 |
| 1KAC | 0.0020  | 1 |
| 1KKL | -0.7306 | 4 |
| 1KLU | -0.1641 | 2 |
| 1KTZ | -0.8458 | 4 |
| 1KXP | 0.2787  | 1 |
| 1KXQ | -0.2590 | 3 |
| 1M10 | -0.0412 | 2 |
| 1MAH | -0.1772 | 2 |
| 1ML0 | -0.6593 | 4 |
| 1MLC | -0.2901 | 3 |
| 1N2C | -0.5412 | 4 |
| 1N80 | -0.0511 | 2 |
| 1NCA | -0.2901 | 3 |
| 1NSN | -0.7584 | 4 |
| 1NW9 | 0.1182  | 1 |
| 1OPH | -0.2333 | 2 |
| 1PPE | 0.2557  | 1 |
| 1QA9 | -0.1077 | 2 |
| 1QFW | 0.2771  | 1 |
| 1R0R | 0.4411  | 1 |
| 1R8S | 0.7085  | 1 |
| 1RLB | -0.4888 | 4 |
| 1S1Q | -0.0182 | 2 |
| 1SBB | -0.1263 | 2 |
| 1T6B | -0.2251 | 2 |
| 1UDI | -0.7893 | 4 |
| 1VFB | -0.1141 | 2 |
| 1WEJ | -0.3876 | 4 |
| 1WQ1 | 0.5558  | 1 |
| 1XD3 | 0.5558  | 1 |
| 1XQS | -0.0023 | 2 |
| 1Y64 | 0.4917  | 1 |
| 1Z0K | 0.8917  | 1 |
| 1Z5Y | -0.1241 | 2 |
| 1ZHI | 0.0293  | 1 |
| 2AJF | 0.1165  | 1 |
| 2B42 | -0.1636 | 2 |
| 2C0L | -0.5353 | 4 |
| 2CFH | -0.4809 | 4 |
| 2FD6 | -0.2532 | 3 |
| 2H7V | 0.8083  | 1 |



|      |         |   |
|------|---------|---|
| 2HLE | -0.6566 | 4 |
| 2HMI | -0.4904 | 4 |
| 2HQS | 0.1366  | 1 |
| 2HRK | -0.4207 | 4 |
| 2I25 | 0.1233  | 1 |
| 2JEL | -0.6368 | 4 |
| 2MTA | -0.7297 | 4 |
| 2NZ8 | 0.5242  | 1 |
| 2O8V | 0.2178  | 1 |
| 2O0B | -0.0836 | 2 |
| 2OT3 | 0.7544  | 1 |
| 2PCC | -0.3792 | 4 |
| 2QFW | -0.0103 | 2 |
| 2SIC | 0.0941  | 1 |
| 2SNI | 0.2394  | 1 |
| 2UUY | 0.1264  | 1 |
| 2VIS | 0.1285  | 1 |
| 7CEI | 0.2995  | 1 |

\*\*\*\*\*

Group 11s-

has pdf file with explanation in email from Thom.Vreven@umassmed.edu

short explanation -

We applied the ZRANK scoring function from our lab, which has been developed to re-rank docking results [1]. Hydrogens were added using the Rosetta package [2]. The area-under-curve (AUC) of the receiver-operator curve is 0.75, indicating that ZRANK is a reasonable predictor. Investigating the behavior further, we noticed that the attractive vdW term, which is a component of ZRANK, gives an AUC of 0.82. Since the vdW term depends primarily on the size on the interface, we speculate that the performance of ZRANK is related to the particular interface sizes of the set of designed complexes. This is supported when using the number of atom contacts (with 6Å cutoff) between the binding partners as predictor, which gives an AUC of 0.81 .

[1] Pierce B, Weng Z. ZRANK: Reranking protein docking predictions with an optimized energy function. *Proteins-Structure Function and Bioinformatics* 2007;67(4):1078-1086.

[2] Gray JJ, Moughon S, Wang C, Schueler-Furman O, Kuhlman B, Rohl CA, Baker D. Protein-protein docking with simultaneous optimization of rigid-body displacement and side-chain conformations. *Journal of Molecular Biology* 2003;331(1):281-299.

|           |           |   |
|-----------|-----------|---|
| design_1  | -54.2095  | 4 |
| design_2  | -43.5998  | 4 |
| design_3  | -88.834 2 |   |
| design_4  | -59.3188  | 3 |
| design_5  | -54.1076  | 4 |
| design_6  | -84.3031  | 2 |
| design_7  | -97.9103  | 2 |
| design_8  | -77.8305  | 5 |
| design_9  | -65.2979  | 3 |
| design_10 | -64.7104  | 3 |
| design_11 | -51.5924  | 4 |
| design_12 | -70.6903  | 5 |
| design_13 | -53.8173  | 4 |
| design_14 | -57.3189  | 4 |
| design_15 | -68.9639  | 5 |
| design_16 | -82.0901  | 2 |
| design_17 | -67.8039  | 5 |
| design_18 | -68.3127  | 5 |
| design_19 | -93.6504  | 2 |
| design_20 | -104.292  | 1 |
| design_21 | -83.4195  | 2 |
| design_22 | -80.1347  | 2 |
| design_23 | -65.7007  | 3 |
| design_24 | -78.682 2 |   |
| design_25 | -52.7295  | 4 |
| design_26 | -62.6116  | 3 |
| design_27 | -69.7417  | 5 |
| design_28 | -62.6114  | 3 |
| design_29 | -103.997  | 1 |
| design_30 | -96.5717  | 2 |
| design_31 | -48.9536  | 4 |
| design_32 | -60.2272  | 3 |
| design_33 | -85.8795  | 2 |
| design_34 | -89.8833  | 2 |
| design_35 | -94.8501  | 2 |
| design_36 | -67.3013  | 3 |
| design_37 | -94.6139  | 2 |
| design_38 | -102.694  | 2 |
| design_39 | -60.1389  | 3 |
| design_40 | -61.3133  | 3 |
| design_41 | -66.332 3 |   |
| design_42 | -82.2422  | 2 |
| design_43 | -88.5778  | 2 |
| design_44 | -74.6762  | 5 |

|           |           |   |
|-----------|-----------|---|
| design_45 | -75.2205  | 5 |
| design_46 | -50.1028  | 4 |
| design_47 | -71.0536  | 5 |
| design_48 | -68.5784  | 5 |
| design_49 | -63.7671  | 3 |
| design_50 | -66.5286  | 3 |
| design_51 | -86.1967  | 2 |
| design_52 | -75.6866  | 5 |
| design_53 | -81.5766  | 2 |
| design_54 | -54.7056  | 4 |
| design_55 | -72.1243  | 5 |
| design_56 | -42.732 4 |   |
| design_57 | -83.5235  | 2 |
| design_58 | -80.5635  | 2 |
| design_59 | -67.7435  | 3 |
| design_60 | -58.0489  | 4 |
| design_61 | -92.1201  | 2 |
| design_62 | -92.1178  | 2 |
| design_63 | -72.8509  | 5 |
| design_64 | -50.4813  | 4 |
| design_65 | -74.1867  | 5 |
| design_66 | -88.358 2 |   |
| design_67 | -40.9544  | 4 |
| design_68 | -78.1151  | 2 |
| design_69 | -89.1319  | 2 |
| design_70 | -59.188 3 |   |
| design_71 | -91.2671  | 2 |
| design_72 | -85.654 2 |   |
| design_73 | -51.757 4 |   |
| design_74 | -53.5563  | 4 |
| design_75 | -67.2955  | 3 |
| design_76 | -88.07 2  |   |
| design_77 | -80.415 2 |   |
| design_78 | -48.702 4 |   |
| design_79 | -37.237 4 |   |
| design_80 | -54.1086  | 4 |
| design_81 | -74.3524  | 5 |
| design_82 | -79.0958  | 2 |
| design_83 | -113.253  | 1 |
| design_84 | -80.0213  | 2 |
| design_85 | -97.0714  | 2 |
| design_86 | -53.7501  | 4 |
| design_87 | -83.4547  | 2 |
| 1A2K      | -98.1066  | 2 |
| 1ACB      | -116.525  | 1 |
| 1AHW      | -91.7122  | 2 |

|      |           |   |
|------|-----------|---|
| 1AK4 | -50.3709  | 4 |
| 1AKJ | -93.5625  | 2 |
| 1AVX | -121.666  | 1 |
| 1AY7 | -80.4904  | 2 |
| 1AZS | -99.4465  | 2 |
| 1B6C | -105.795  | 1 |
| 1BGX | -223.762  | 1 |
| 1BJ1 | -109.787  | 1 |
| 1BKD | -157.818  | 1 |
| 1BUH | -66.3244  | 3 |
| 1BVK | -56.6103  | 4 |
| 1BVN | -134.322  | 1 |
| 1CGI | -155.963  | 1 |
| 1D6R | -83.2146  | 2 |
| 1DE4 | -102.732  | 1 |
| 1DFJ | -129.096  | 1 |
| 1DQJ | -77.6184  | 5 |
| 1E4K | -85.5908  | 2 |
| 1E6J | -77.094 5 |   |
| 1E96 | -76.3037  | 5 |
| 1EAW | -114.713  | 1 |
| 1EER | -234.116  | 1 |
| 1EFN | -80.2186  | 2 |
| 1EWY | -80.9605  | 2 |
| 1EZU | -142.524  | 1 |
| 1F34 | -127.597  | 1 |
| 1F51 | -114.449  | 1 |
| 1FAK | -131.15 1 |   |
| 1FC2 | -66.1225  | 3 |
| 1FQ1 | -105.098  | 1 |
| 1FQJ | -71.0644  | 5 |
| 1FSK | -104.887  | 1 |
| 1GCQ | -68.8924  | 5 |
| 1GHQ | -14.5526  | 4 |
| 1GLA | -87.0095  | 2 |
| 1GP2 | -137.092  | 1 |
| 1GPW | -135.199  | 1 |
| 1GRN | -101.28 2 |   |
| 1H1V | -46.9424  | 4 |
| 1HE1 | -114.324  | 1 |
| 1HE8 | -76.7497  | 5 |
| 1HIA | -113.557  | 1 |
| 1I2M | -161.798  | 1 |
| 1I4D | -68.1423  | 5 |
| 1I9R | -77.6153  | 5 |
| 1IB1 | -123.498  | 1 |

|      |          |   |
|------|----------|---|
| 1IBR | -200.365 | 1 |
| 1IJK | -129.2   | 1 |
| 1IQD | -151.759 | 1 |
| 1IRA | -155.789 | 1 |
| 1J2J | -59.723  | 3 |
| 1JMO | -233.246 | 1 |
| 1JPS | -100.755 | 2 |
| 1K4C | -111.516 | 1 |
| 1K5D | -184.779 | 1 |
| 1K74 | -121.555 | 1 |
| 1KAC | -70.446  | 5 |
| 1KKL | -76.0651 | 5 |
| 1KLU | -60.1236 | 3 |
| 1KTZ | -62.3266 | 3 |
| 1KXP | -180.994 | 1 |
| 1KXQ | -97.396  | 2 |
| 1M10 | -135.17  | 1 |
| 1MAH | -121.641 | 1 |
| 1ML0 | -170.592 | 1 |
| 1MLC | -86.2662 | 2 |
| 1N2C | -229.189 | 1 |
| 1N80 | -120.44  | 1 |
| 1NCA | -102.858 | 1 |
| 1NSN | -59.9277 | 3 |
| 1NW9 | -122.698 | 1 |
| 1OPH | -86.2429 | 2 |
| 1PPE | -121.923 | 1 |
| 1PXV | -147.675 | 1 |
| 1QA9 | -65.4071 | 3 |
| 1QFW | -80.5551 | 2 |
| 1R0R | -82.7869 | 2 |
| 1R8S | -172.229 | 1 |
| 1RLB | -62.3366 | 3 |
| 1S1Q | -40.3317 | 4 |
| 1SBB | -41.4878 | 4 |
| 1T6B | -80.7864 | 2 |
| 1UDI | -119.633 | 1 |
| 1VFB | -58.4516 | 4 |
| 1WEJ | -68.1119 | 5 |
| 1WQ1 | -146.643 | 1 |
| 1XD3 | -141.185 | 1 |
| 1XQS | -187.368 | 1 |
| 1Y64 | -96.9998 | 2 |
| 1YVB | -96.111  | 2 |
| 1Z0K | -104.395 | 1 |
| 1Z5Y | -84.4071 | 2 |

|      |          |   |
|------|----------|---|
| 1ZHI | -74.1985 | 5 |
| 2AJF | -52.0478 | 4 |
| 2B42 | -108.103 | 1 |
| 2C0L | -104.234 | 1 |
| 2CFH | -145.227 | 1 |
| 2FD6 | -61.7296 | 3 |
| 2H7V | -85.2176 | 2 |
| 2HLE | -143.859 | 1 |
| 2HMI | -60.814  | 3 |
| 2HQS | -103.003 | 1 |
| 2HRK | -68.171  | 5 |
| 2I25 | -84.3263 | 2 |
| 2JEL | -67.543  | 3 |
| 2MTA | -60.6691 | 3 |
| 2NZ8 | -109.871 | 1 |
| 2O8V | -102.027 | 2 |
| 2O0B | -41.3815 | 4 |
| 2OT3 | -157.188 | 1 |
| 2PCC | -71.4377 | 5 |
| 2QFW | -86.6897 | 2 |
| 2SIC | -98.1362 | 2 |
| 2SNI | -105.602 | 1 |
| 2UUY | -91.7453 | 2 |
| 2VIS | -64.0717 | 3 |
| 7CEI | -120.386 | 1 |

\*\*\*\*\*

Group 12s -

The "Raw score" values are based on our pyDock energy-based function, with a new weight for desolvation as derived from fitting to the Bonvin experimental data set. The units are technically in kcal/mol but in practice they can be considered as arbitrary units. Based solely on the correlation with the experimental data, we decided to make the following "normalized score" categories:

- 1 - binds  $E < -15.0$
- 2 - likely to bind  $-15.0 < E < -5.0$
- 3 - likely not to bind  $+5.0 < E < +15.0$
- 4 - does not bind  $E > +15.0$
- 5 - uncertain  $-5.0 < E < +5.0$

|          | Raw score | normalized score |
|----------|-----------|------------------|
| design_1 | 11.047    | 3                |
| design_2 | 4.225     | 5                |
| design_3 | 3.437     | 5                |

|           |         |   |
|-----------|---------|---|
| design_4  | -3.713  | 5 |
| design_5  | 0.699   | 5 |
| design_6  | 3.582   | 5 |
| design_7  | -14.170 | 2 |
| design_8  | 24.219  | 4 |
| design_9  | -1.500  | 5 |
| design_10 | 32.957  | 4 |
| design_11 | 1.207   | 5 |
| design_12 | 24.288  | 4 |
| design_13 | 4.568   | 5 |
| design_14 | 26.951  | 4 |
| design_15 | 16.783  | 4 |
| design_16 | 12.015  | 3 |
| design_17 | 18.035  | 4 |
| design_18 | 11.938  | 3 |
| design_19 | 14.356  | 3 |
| design_20 | 25.292  | 4 |
| design_21 | 16.421  | 4 |
| design_22 | 13.682  | 3 |
| design_23 | 15.113  | 4 |
| design_24 | -0.641  | 5 |
| design_25 | -2.845  | 5 |
| design_26 | -6.937  | 2 |
| design_27 | 3.316   | 5 |
| design_28 | 18.686  | 4 |
| design_29 | -1.470  | 5 |
| design_30 | 8.509   | 3 |
| design_31 | 11.975  | 3 |
| design_32 | 10.868  | 3 |
| design_33 | 12.887  | 3 |
| design_34 | 25.664  | 4 |
| design_35 | 38.980  | 4 |
| design_36 | 2.343   | 5 |
| design_37 | 9.054   | 3 |
| design_38 | 14.981  | 3 |
| design_39 | 14.426  | 3 |
| design_40 | 8.342   | 3 |
| design_41 | 13.410  | 3 |
| design_42 | 1.532   | 5 |
| design_43 | -2.976  | 5 |
| design_44 | 17.499  | 4 |
| design_45 | 23.829  | 4 |
| design_46 | 11.558  | 3 |
| design_47 | 13.307  | 3 |
| design_48 | 49.070  | 4 |
| design_49 | 54.258  | 4 |

|           |         |   |
|-----------|---------|---|
| design_50 | 3.208   | 5 |
| design_51 | 20.453  | 4 |
| design_52 | -20.885 | 1 |
| design_53 | -2.585  | 5 |
| design_54 | 7.930   | 3 |
| design_55 | 25.470  | 4 |
| design_56 | 12.656  | 3 |
| design_57 | -7.382  | 2 |
| design_58 | 6.464   | 3 |
| design_59 | -4.003  | 5 |
| design_60 | 4.070   | 5 |
| design_61 | -4.092  | 5 |
| design_62 | 22.112  | 4 |
| design_63 | -1.503  | 5 |
| design_64 | 7.957   | 3 |
| design_65 | -14.033 | 2 |
| design_66 | 22.479  | 4 |
| design_67 | -6.901  | 2 |
| design_68 | -1.015  | 5 |
| design_69 | 6.419   | 3 |
| design_70 | 9.082   | 3 |
| design_71 | 20.235  | 4 |
| design_72 | -14.626 | 2 |
| design_73 | -14.580 | 2 |
| design_74 | 21.350  | 4 |
| design_75 | 16.779  | 4 |
| design_76 | -7.390  | 2 |
| design_77 | -0.183  | 5 |
| design_78 | 4.386   | 5 |
| design_79 | -10.709 | 2 |
| design_80 | 8.564   | 3 |
| design_81 | -3.531  | 5 |
| design_82 | 14.806  | 3 |
| design_83 | 37.252  | 4 |
| design_84 | 16.634  | 4 |
| design_85 | 29.577  | 4 |
| design_86 | 15.579  | 4 |
| design_87 | 15.024  | 4 |
| 1A2K      | -9.066  | 2 |
| 1ACB      | 20.070  | 4 |
| 1AHW      | -50.795 | 1 |
| 1AK4      | 3.901   | 5 |
| 1AKJ      | -85.876 | 1 |
| 1AVX      | -6.888  | 2 |
| 1AY7      | -16.907 | 1 |
| 1AZS      | 20.233  | 4 |



|      |          |   |
|------|----------|---|
| 1B6C | 0.111    | 5 |
| 1BGX | -35.679  | 1 |
| 1BJ1 | 9.708    | 3 |
| 1BKD | -43.236  | 1 |
| 1BUH | -3.138   | 5 |
| 1BVK | -5.512   | 2 |
| 1BVN | 7.710    | 3 |
| 1CGI | 16.991   | 4 |
| 1D6R | -16.923  | 1 |
| 1DE4 | -26.011  | 1 |
| 1DFJ | -69.825  | 1 |
| 1DQJ | -6.238   | 2 |
| 1E4K | -2.311   | 5 |
| 1E6J | 3.103    | 5 |
| 1E96 | -8.643   | 2 |
| 1EAW | -12.842  | 2 |
| 1EER | -92.275  | 1 |
| 1EFN | -9.494   | 2 |
| 1EWY | -47.833  | 1 |
| 1EZU | 13.981   | 3 |
| 1F34 | -4.804   | 5 |
| 1F51 | -8.883   | 2 |
| 1FAK | -27.105  | 1 |
| 1FC2 | 19.583   | 4 |
| 1FQ1 | -21.172  | 1 |
| 1FQJ | -49.094  | 1 |
| 1FSK | -8.490   | 2 |
| 1GCQ | 3.761    | 5 |
| 1GHQ | -1.233   | 5 |
| 1GLA | -20.311  | 1 |
| 1GP2 | -27.219  | 1 |
| 1GPW | -46.550  | 1 |
| 1GRN | -35.551  | 1 |
| 1H1V | -9.622   | 2 |
| 1HE1 | -3.027   | 5 |
| 1HE8 | -28.506  | 1 |
| 1HIA | -20.386  | 1 |
| 1I2M | -89.927  | 1 |
| 1I4D | 12.958   | 3 |
| 1I9R | -39.700  | 1 |
| 1IB1 | -45.044  | 1 |
| 1IBR | -120.679 | 1 |
| 1IJK | -50.571  | 1 |
| 1IQD | -18.517  | 1 |
| 1IRA | -30.730  | 1 |
| 1J2J | 9.828    | 3 |

|      |         |   |
|------|---------|---|
| 1JMO | -47.796 | 1 |
| 1JPS | -56.304 | 1 |
| 1K4C | -7.187  | 2 |
| 1K5D | -86.871 | 1 |
| 1K74 | -56.574 | 1 |
| 1KAC | -15.765 | 1 |
| 1KKL | -8.540  | 2 |
| 1KLU | 5.009   | 3 |
| 1KTZ | -7.361  | 2 |
| 1KXP | -30.281 | 1 |
| 1KXQ | 1.795   | 5 |
| 1M10 | -71.704 | 1 |
| 1MAH | -8.537  | 2 |
| 1ML0 | -60.229 | 1 |
| 1MLC | -4.904  | 5 |
| 1N2C | -80.532 | 1 |
| 1N80 | 12.546  | 3 |
| 1NCA | -26.102 | 1 |
| 1NSN | -1.914  | 5 |
| 1NW9 | 22.954  | 4 |
| 1OPH | -10.547 | 2 |
| 1PPE | 0.608   | 5 |
| 1PXV | -6.611  | 2 |
| 1QA9 | -54.607 | 1 |
| 1QFW | -12.085 | 2 |
| 1R0R | 0.636   | 5 |
| 1R8S | 0.225   | 5 |
| 1RLB | -10.353 | 2 |
| 1S1Q | -8.035  | 2 |
| 1SBB | 5.952   | 3 |
| 1T6B | -26.688 | 1 |
| 1UDI | -42.577 | 1 |
| 1VFB | -10.293 | 2 |
| 1WEJ | -34.047 | 1 |
| 1WQ1 | -51.092 | 1 |
| 1XD3 | -26.823 | 1 |
| 1XQS | -90.208 | 1 |
| 1Y64 | -45.176 | 1 |
| 1YVB | 11.304  | 3 |
| 1Z0K | -13.341 | 2 |
| 1Z5Y | 18.405  | 4 |
| 1ZHI | -20.348 | 1 |
| 2AJF | -8.159  | 2 |
| 2B42 | -17.856 | 1 |
| 2C0L | -26.957 | 1 |
| 2CFH | -1.216  | 5 |

|      |         |   |
|------|---------|---|
| 2FD6 | 7.039   | 3 |
| 2H7V | -7.695  | 2 |
| 2HLE | -27.350 | 1 |
| 2HMI | 13.747  | 3 |
| 2HQS | -26.093 | 1 |
| 2HRK | 2.974   | 5 |
| 2I25 | -22.604 | 1 |
| 2JEL | -11.133 | 2 |
| 2MTA | 9.901   | 3 |
| 2NZ8 | -7.852  | 2 |
| 2O8V | 8.464   | 3 |
| 2O0B | 9.610   | 3 |
| 2OT3 | 12.643  | 3 |
| 2PCC | -55.606 | 1 |
| 2QFW | 15.627  | 4 |
| 2SIC | 4.840   | 5 |
| 2SNI | -0.966  | 5 |
| 2UUY | 3.727   | 5 |
| 2VIS | 0.984   | 5 |
| 7CEI | -80.907 | 1 |

\*\*\*\*\*

Group 14s -

REMARK Please use this file to submit your results for both designs and  
REMARK the docking benchmark.

REMARK Change the file name from GroupXXX.txt to represent your group's  
name (Group14s.txt, Fan Jiang).

REMARK Add raw and normalized scores in the table below.

REMARK Fill in the units in which the raw scores were computed below.

Raw scores are given in units of sigma for z-score  
Raw score                      normalized score

design\_1 -1.08693 5  
design\_2 -1.35818 5  
design\_3 -3.06294 1  
design\_4 -1.23158 5  
design\_5 -0.842242 3  
design\_6 -1.07451 5  
design\_7 -1.56007 5  
design\_8 -1.97668 5  
design\_9 -1.13102 5  
design\_10 -1.7418 5  
design\_11 -1.24259 5  
design\_12 -1.92746 5

design\_13 -1.76039 5  
design\_14 -1.46755 5  
design\_15 -2.37907 2  
design\_16 -2.01954 2  
design\_17 -1.06874 5  
design\_18 -1.77489 5  
design\_19 -2.74962 2  
design\_20 -3.78682 1  
design\_21 -1.5616 5  
design\_22 -2.15015 2  
design\_23 -2.25417 2  
design\_24 -1.60173 5  
design\_25 -1.5688 5  
design\_26 -1.4783 5  
design\_27 -1.72965 5  
design\_28 -1.57068 5  
design\_29 -1.69227 5  
design\_30 -2.67521 2  
design\_31 -1.22768 5  
design\_32 -1.15291 5  
design\_33 -2.91998 2  
design\_34 -2.42303 2  
design\_35 -2.6151 2  
design\_36 -1.53769 5  
design\_37 -2.12691 2  
design\_38 -2.13424 2  
design\_39 -1.43388 5  
design\_40 -1.39641 5  
design\_41 -1.60583 5  
design\_42 -2.39886 2  
design\_43 -1.52213 5  
design\_44 -2.39127 2  
design\_45 -1.92207 5  
design\_46 -1.33028 5  
design\_47 -1.80545 5  
design\_48 -2.40938 2  
design\_49 -2.19936 2  
design\_50 -1.42003 5  
design\_51 -2.03172 2  
design\_52 -2.11574 2  
design\_53 -2.10822 2  
design\_54 -1.96452 5  
design\_55 -1.65291 5  
design\_56 -1.82464 5  
design\_57 -2.04356 2  
design\_58 -1.65652 5

design\_59 -1.91108 5  
design\_60 -1.83141 5  
design\_61 -1.93248 5  
design\_62 -2.70277 2  
design\_63 -1.92635 5  
design\_64 -1.1933 5  
design\_65 -1.49893 5  
design\_66 -1.4743 5  
design\_67 -1.0701 5  
design\_68 -1.62964 5  
design\_69 -2.15877 2  
design\_70 -1.807 5  
design\_71 -1.73998 5  
design\_72 -2.44903 2  
design\_73 -1.30951 5  
design\_74 -2.08992 2  
design\_75 -1.77386 5  
design\_76 -1.49479 5  
design\_77 -1.83341 5  
design\_78 -1.25023 5  
design\_79 -0.850169 3  
design\_80 -1.60543 5  
design\_81 -2.11844 2  
design\_82 -2.18513 2  
design\_83 -3.55153 1  
design\_84 -1.8779 5  
design\_85 -1.943 5  
design\_86 -1.49382 5  
design\_87 -2.15792 2  
1A2K -2.78674 2  
1ACB -2.86472 2  
1AHW -1.35257 5  
1AK4 -2.36668 2  
1AKJ -1.98801 5  
1AVX -3.19702 1  
1AY7 -2.84233 2  
1AZS -3.34508 1  
1B6C -1.98758 5  
1BGX -8.45875 1  
1BJ1 -4.00269 1  
1BKD -4.14363 1  
1BUH -1.61304 5  
1BVK -1.72327 5  
1BVN -3.27283 1  
1CGI -4.60108 1  
1D6R -2.57204 2

1DE4 -2.80802 2  
1DFJ -3.23371 1  
1DQJ -1.65302 5  
1E4K -1.09153 5  
1E6J -1.99995 5  
1E96 -1.61624 5  
1EAW -3.78369 1  
1EER -5.16181 1  
1EFN -2.17831 2  
1EWY -1.3379 5  
1EZU -5.6465 1  
1F34 -5.27284 1  
1F51 -2.1125 2  
1FAK -3.00209 1  
1FC2 -1.70571 5  
1FQ1 -1.68519 5  
1FQJ -2.60303 2  
1FSK -4.23723 1  
1GCQ -1.92281 5  
1GHQ -1.04601 5  
1GLA -2.014 2  
1GP2 -2.6143 2  
1GPW -3.07566 1  
1GRN -2.30799 2  
1H1V -2.46166 2  
1HE1 -3.48787 1  
1HE8 -1.06702 5  
1HIA -3.21836 1  
1I2M -4.48648 1  
1I4D -1.71891 5  
1I9R -2.26922 2  
1IB1 -3.85149 1  
1IBR -4.55961 1  
1IJK -1.89163 5  
1IQD -3.37454 1  
1IRA -3.53553 1  
1J2J -1.38083 5  
1JMO -6.95177 1  
1JPS -2.37978 2  
1K4C -3.92671 1  
1K5D -5.1897 1  
1K74 -2.49634 2  
1KAC -1.56719 5  
1KKL -1.63771 5  
1KLU -2.00472 2  
1KTZ -1.63229 5

1KXP -3.0578 1  
1KXQ -4.22967 1  
1M10 -2.91073 2  
1MAH -3.42041 1  
1ML0 -4.22161 1  
1MLC -2.66435 2  
1N2C -8.3291 1  
1N80 -3.5563 1  
1NCA -2.3463 2  
1NSN -1.01797 5  
1NW9 -4.64067 1  
1OPH -2.68631 2  
1PPE -3.58191 1  
1PXV -4.42404 1  
1QA9 -2.71108 2  
1QFW -1.49758 5  
1R0R -3.53876 1  
1R8S -3.9972 1  
1RLB -1.25755 5  
1S1Q -1.74319 5  
1SBB -1.59586 5  
1T6B -1.39347 5  
1UDI -1.25385 5  
1VFB -2.56165 2  
1WEJ -2.13313 2  
1WQ1 -3.99341 1  
1XD3 -3.82592 1  
1XQS -3.0143 1  
1Y64 -1.21679 5  
1YVB -2.31595 2  
1Z0K -1.66084 5  
1Z5Y -2.55802 2  
1ZHI -2.20038 2  
2AJF -2.05521 2  
2B42 -4.68982 1  
2C0L -2.4401 2  
2CFH -3.40305 1  
2FD6 -2.57422 2  
2H7V -1.55653 5  
2HLE -3.3068 1  
2HMI -1.55506 5  
2HQS -3.2061 1  
2HRK -1.21433 5  
2I25 -2.69766 2  
2JEL -1.91034 5  
2MTA -1.9606 5

2NZ8 -3.06954 1  
208V -3.70833 1  
200B -0.919975 3  
20T3 -4.67878 1  
2PCC -0.279167 4  
2QFW -2.07956 2  
2SIC -4.53697 1  
2SNI -3.38707 1  
2UUY -2.46463 2  
2VIS -2.34114 2  
7CEI -1.63299 5

\*\*\*\*\*

Group 16s-

|           | Raw score | normalized score |
|-----------|-----------|------------------|
| design_1  | -15.76    | 3                |
| design_2  | -15.08    | 3                |
| design_3  | -18.6     | 5                |
| design_4  | -11.44    | 4                |
| design_5  | -11.72    | 4                |
| design_6  | -12.12    | 4                |
| design_7  | -14.88    | 3                |
| design_8  | -10.48    | 4                |
| design_9  | -10.56    | 4                |
| design_10 | -13.92    | 3                |
| design_11 | -10.48    | 4                |
| design_12 | -13.08    | 4                |
| design_13 | -14.6     | 3                |
| design_14 | -12.68    | 4                |
| design_15 | -13.36    | 4                |
| design_16 | -15       | 3                |
| design_17 | -14.04    | 3                |
| design_18 | -12.8     | 4                |
| design_19 | -14.92    | 3                |
| design_20 | -21.88    | 1                |
| design_21 | -11.96    | 4                |
| design_22 | -12.4     | 4                |
| design_23 | -12.88    | 4                |
| design_24 | -14.64    | 3                |
| design_25 | -10.28    | 4                |
| design_26 | -12.48    | 4                |
| design_27 | -14.32    | 3                |
| design_28 | -10.68    | 4                |
| design_29 | -13.08    | 4                |
| design_30 | -20.48    | 1                |



|           |        |   |
|-----------|--------|---|
| design_31 | -12.12 | 4 |
| design_32 | -9.12  | 4 |
| design_33 | -15.4  | 3 |
| design_34 | -18.24 | 5 |
| design_35 | -18.64 | 5 |
| design_36 | -13.56 | 4 |
| design_37 | -12.92 | 4 |
| design_38 | -17.4  | 5 |
| design_39 | -11.52 | 4 |
| design_40 | -12.2  | 4 |
| design_41 | -12.4  | 4 |
| design_42 | -16.24 | 3 |
| design_43 | -14.12 | 3 |
| design_44 | -21.12 | 1 |
| design_45 | -16.44 | 3 |
| design_46 | -13.28 | 4 |
| design_47 | -14.88 | 3 |
| design_48 | -14.04 | 3 |
| design_49 | -10.68 | 4 |
| design_50 | -12.48 | 4 |
| design_51 | -12.2  | 4 |
| design_52 | -20.08 | 2 |
| design_53 | -15.76 | 3 |
| design_54 | -13.28 | 4 |
| design_55 | -10.68 | 4 |
| design_56 | -13.28 | 4 |
| design_57 | -17.4  | 5 |
| design_58 | -18.64 | 5 |
| design_59 | -17    | 5 |
| design_60 | -12.48 | 4 |
| design_61 | -15.56 | 3 |
| design_62 | -13.48 | 4 |
| design_63 | -14.6  | 3 |
| design_64 | -8.96  | 4 |
| design_65 | -14.04 | 3 |
| design_66 | -16.04 | 3 |
| design_67 | -14.92 | 3 |
| design_68 | -9.92  | 4 |
| design_69 | -13.92 | 3 |
| design_70 | -12.2  | 4 |
| design_71 | -13.84 | 3 |
| design_72 | -19.12 | 5 |
| design_73 | -9.04  | 4 |
| design_74 | -10.68 | 4 |
| design_75 | -8.76  | 4 |
| design_76 | -19.6  | 5 |

|           |        |   |
|-----------|--------|---|
| design_77 | -17.76 | 5 |
| design_78 | -11.52 | 4 |
| design_79 | -13.64 | 4 |
| design_80 | -12.96 | 4 |
| design_81 | -15.48 | 3 |
| design_82 | -13.2  | 4 |
| design_83 | -16.36 | 3 |
| design_84 | -13.68 | 4 |
| design_85 | -15.28 | 3 |
| design_86 | -12.68 | 4 |
| design_87 | -14.32 | 3 |
| 1A2K      | -20.4  | 2 |
| 1ACB      | -24.48 | 1 |
| 1AHW      | -24.88 | 1 |
| 1AK4      | -12.66 | 4 |
| 1AKJ      | -21.6  | 1 |
| 1AVX      | -24.48 | 1 |
| 1AY7      | -14.24 | 3 |
| 1B6C      | -22    | 1 |
| 1BGX      | -75.64 | 1 |
| 1BJ1      | -27.84 | 1 |
| 1BUH      | -17.76 | 5 |
| 1BVK      | -15.84 | 3 |
| 1BVN      | -27.76 | 1 |
| 1CGI      | -33.52 | 1 |
| 1D6R      | -19.32 | 5 |
| 1DE4      | -22.08 | 1 |
| 1DFJ      | -23.72 | 1 |
| 1DQJ      | -24.48 | 1 |
| 1E6J      | -15.28 | 3 |
| 1E96      | -14.24 | 3 |
| 1EAW      | -26.36 | 1 |
| 1EER      | -41.52 | 1 |
| 1EWY      | -11.84 | 4 |
| 1EZU      | -36.52 | 1 |
| 1F34      | -42.28 | 1 |
| 1F51      | -22.68 | 1 |
| 1FAK      | -27.84 | 1 |
| 1FC2      | -13.92 | 3 |
| 1FQ1      | -16.8  | 5 |
| 1FQJ      | -20.08 | 2 |
| 1FSK      | -22.68 | 1 |
| 1GCQ      | -17.15 | 5 |
| 1GHQ      | -7.68  | 4 |
| 1GP2      | -26.24 | 1 |
| 1GRN      | -24.92 | 1 |

|      |        |   |
|------|--------|---|
| 1H1V | -19.23 | 5 |
| 1HE1 | -23.79 | 1 |
| 1HE8 | -13.92 | 3 |
| 1HIA | -24.96 | 1 |
| 1I2M | -33.52 | 1 |
| 1I4D | -18.6  | 5 |
| 1I9R | -19.52 | 5 |
| 1IB1 | -30.08 | 1 |
| 1IBR | -41.28 | 1 |
| 1IJK | -15.84 | 3 |
| 1IQD | -30.44 | 1 |
| 1JPS | -25.2  | 1 |
| 1K4C | -20.68 | 2 |
| 1K5D | -36.07 | 1 |
| 1KAC | -18.84 | 5 |
| 1KKL | -21.16 | 1 |
| 1KLU | -13.12 | 4 |
| 1KTZ | -11.04 | 4 |
| 1KXP | -40.24 | 1 |
| 1KXQ | -24.12 | 1 |
| 1M10 | -23.96 | 1 |
| 1MAH | -23.24 | 1 |
| 1ML0 | -30.28 | 1 |
| 1MLC | -22.56 | 1 |
| 1N2C | -20.36 | 2 |
| 1NCA | -24.32 | 1 |
| 1NSN | -15.68 | 3 |
| 1PPE | -24.68 | 1 |
| 1QA9 | -12.96 | 4 |
| 1QFW | -20.76 | 2 |
| 1RLB | -12.96 | 4 |
| 1SBB | -10.88 | 4 |
| 1UDI | -21.3  | 1 |
| 1VFB | -18.72 | 5 |
| 1WEJ | -16.04 | 3 |
| 1WQ1 | -29.32 | 1 |
| 2HNI | -14.4  | 3 |
| 2JEL | -19.4  | 5 |
| 2MTA | -13.48 | 4 |
| 2PCC | -9.35  | 4 |
| 2QFW | -19.68 | 5 |
| 2SIC | -25.64 | 1 |
| 2SNI | -22.76 | 1 |
| 2VIS | -17.4  | 5 |
| 7CEI | -21.04 | 2 |
| 1AZS | -21.6  | 1 |

|      |        |   |
|------|--------|---|
| 1BKD | -36.24 | 1 |
| 1E4K | -14.04 | 3 |
| 1EFN | -13.16 | 4 |
| 1GLA | -14.4  | 3 |
| 1GPW | -24.6  | 1 |
| 1IRA | -34    | 1 |
| 1J2J | -11.92 | 4 |
| 1JMO | 0      |   |
| 1K74 | -21.96 | 1 |
| 1N80 | -30.11 | 1 |
| 1NW9 | -30.12 | 1 |
| 1OPH | -21.08 | 1 |
| 1PXV | -32.12 | 1 |
| 1R0R | -21.08 | 1 |
| 1R8S | -36.52 | 1 |
| 1S1Q | -11.76 | 4 |
| 1T6B | -22.32 | 1 |
| 1XD3 | -31.92 | 1 |
| 1XQS | -27.88 | 1 |
| 1Y64 | -16.92 | 5 |
| 1YVB | -19.52 | 5 |
| 1Z0K | -24.96 | 1 |
| 1Z5Y | -17.8  | 5 |
| 1ZHI | -13.6  | 4 |
| 2AJF | -16.32 | 3 |
| 2B42 | -35.72 | 1 |
| 2C0L | -21.58 | 1 |
| 2CFH | -27.92 | 1 |
| 2FD6 | -18.24 | 5 |
| 2H7V | -17.4  | 5 |
| 2HLE | -31.52 | 1 |
| 2HQS | -30.92 | 1 |
| 2HRK | -15.36 | 3 |
| 2I25 | -23.08 | 1 |
| 2NZ8 | -27.4  | 1 |
| 2O8V | -22.48 | 1 |
| 2O0B | -8.68  | 4 |
| 2OT3 | -30.18 | 1 |
| 2UUY | -22.8  | 1 |

We found that using rpscore alone can achieve better results than our combinatorial scoring function for this issue.

The raw scores above are rpscores, the normalized scores are determined by raw scores.

\*\*\*\*\*

Group 17s-

% result files with explanations in email from Charles Rober

(robert@ibpc.fr)

\*\*\*\*\*

Group 20s-

design\_1.pdb -152.033 5  
design\_2.pdb -273.597 3  
design\_3.pdb -157.047 5  
design\_4.pdb -237.936 3  
design\_5.pdb -156.308 5  
design\_6.pdb -122.828 5  
design\_7.pdb -234.427 3  
design\_8.pdb -287.733 3  
design\_9.pdb -258.069 3  
design\_10.pdb -345.66 2  
design\_11.pdb -158.197 5  
design\_12.pdb -361.55 2  
design\_13.pdb -242.971 3  
design\_14.pdb -143.996 5  
design\_15.pdb -164.076 5  
design\_16.pdb -257.84 3  
design\_17.pdb -250.72 3  
design\_18.pdb -254.208 3  
design\_19.pdb -109.389 5  
design\_20.pdb -320.652 2  
design\_21.pdb -294.817 3  
design\_22.pdb -126.708 5  
design\_23.pdb -114.739 5  
design\_24.pdb -95.7908 4  
design\_25.pdb -204.503 3  
design\_26.pdb -185.622 5  
design\_27.pdb -189.851 5  
design\_28.pdb -84.5884 4  
design\_29.pdb -89.284 4  
design\_30.pdb -164.311 5  
design\_31.pdb -147.865 5  
design\_32.pdb -231.319 3  
design\_33.pdb -256.135 3  
design\_34.pdb -232.38 3  
design\_35.pdb -293.433 3  
design\_36.pdb -320.842 2  
design\_37.pdb -248.711 3  
design\_38.pdb -130.828 5  
design\_39.pdb -185.137 5  
design\_40.pdb -225.944 3  
design\_41.pdb -204.625 3  
design\_42.pdb -206.632 3  
design\_43.pdb -256.143 3

design\_44.pdb -288.19 3  
design\_45.pdb -348.732 2  
design\_46.pdb -175.431 5  
design\_47.pdb -134.367 5  
design\_48.pdb -260.064 3  
design\_49.pdb -101.043 5  
design\_50.pdb -185.067 5  
design\_51.pdb -126.811 5  
design\_52.pdb -308.295 2  
design\_53.pdb -252.179 3  
design\_54.pdb -127.3 5  
design\_55.pdb -328.584 2  
design\_56.pdb -173.654 5  
design\_57.pdb -96.0207 4  
design\_58.pdb -126.128 5  
design\_59.pdb -146.607 5  
design\_60.pdb -206.318 3  
design\_61.pdb -329.308 2  
design\_62.pdb -162.817 5  
design\_63.pdb -133.447 5  
design\_64.pdb -265.829 3  
design\_65.pdb -171.924 5  
design\_66.pdb -288.694 3  
design\_67.pdb -145.077 5  
design\_68.pdb -152.497 5  
design\_69.pdb -249.792 3  
design\_70.pdb -158.451 5  
design\_71.pdb -102.163 5  
design\_72.pdb -285.102 3  
design\_73.pdb -179.176 5  
design\_74.pdb -189.111 5  
design\_75.pdb -211.597 3  
design\_76.pdb -286.164 3  
design\_77.pdb -236.676 3  
design\_78.pdb -182.811 5  
design\_79.pdb -79.9939 4  
design\_80.pdb -209.237 3  
design\_81.pdb -127.469 5  
design\_82.pdb -316.599 2  
design\_83.pdb -360.262 2  
design\_84.pdb -225.875 3  
design\_85.pdb -272.298 3  
design\_86.pdb -159.549 5  
design\_87.pdb -169.339 5  
1A2K.pdb -212.858 3  
1ACB.pdb -295.49 3

1AHW.pdb -316.106 2  
1AK4.pdb -143.433 5  
1AKJ.pdb -27.0674 4  
1AVX.pdb -353.548 2  
1AY7.pdb -192.135 5  
1AZS.pdb -203.629 3  
1B6C.pdb -368.857 2  
1BGX.pdb -680.46 1  
1BJ1.pdb -291.849 3  
1BKD.pdb -410.239 1  
1BUH.pdb -136.266 5  
1BVK.pdb -213.917 3  
1BVN.pdb -443.535 1  
1CGI.pdb -433.596 1  
1D6R.pdb -181.635 5  
1DE4.pdb -344.569 2  
1DFJ.pdb -188.285 5  
1DQJ.pdb -262.143 3  
1E4K.pdb -97.2931 4  
1E6J.pdb -190.087 5  
1E96.pdb -173.945 5  
1EAW.pdb -526.362 1  
1EER.pdb -99.7758 4  
1EFN.pdb -98.4382 4  
1EWY.pdb -84.8175 4  
1EZU.pdb -381.278 2  
1F34.pdb -346.43 2  
1F51.pdb -246.524 3  
1FAK.pdb -221.007 3  
1FC2.pdb -152.516 5  
1FQ1.pdb -170.358 5  
1FQJ.pdb -106.434 5  
1FSK.pdb -356.89 2  
1GCQ.pdb -137.863 5  
1GHQ.pdb -22.4147 4  
1GLA.pdb -120.582 5  
1GP2.pdb -178.874 5  
1GPW.pdb -234.614 3  
1GRN.pdb -270.135 3  
1H1V.pdb -343.143 2  
1HE1.pdb -344.653 2  
1HE8.pdb -100.669 5  
1HIA.pdb -272.141 3  
1I2M.pdb -160.036 5  
1I4D.pdb -188.885 5  
1I9R.pdb -183.982 5

1IB1.pdb -206.912 3  
1IBR.pdb -273.309 3  
1IJK.pdb -232.686 3  
1IQD.pdb -234.026 3  
1IRA.pdb -202.86 3  
1J2J.pdb -214.06 3  
1JMO.pdb -343.453 2  
1JPS.pdb -253.278 3  
1K4C.pdb -207.609 3  
1K5D.pdb -211.76 3  
1K74.pdb -452.897 1  
1KAC.pdb -100.437 5  
1KKL.pdb -325.869 2  
1KLU.pdb -124.391 5  
1KTZ.pdb -48.7399 4  
1KXP.pdb -516.192 1  
1KXQ.pdb -309.133 2  
1M10.pdb -109.776 5  
1MAH.pdb -202.605 3  
1ML0.pdb -149.925 5  
1MLC.pdb -249.877 3  
1N2C.pdb -755.82 1  
1N80.pdb -384.953 2  
1NCA.pdb -228.226 3  
1NSN.pdb -171.256 5  
1NW9.pdb -263.128 3  
1OPH.pdb -125.578 5  
1PPE.pdb -352.1 2  
1PXV.pdb -339.407 2  
1QA9.pdb -47.721 4  
1QFW.pdb -183.678 5  
1R0R.pdb -374.238 2  
1R8S.pdb -494.181 1  
1RLB.pdb -110.069 5  
1S1Q.pdb -114.674 5  
1SBB.pdb -135.491 5  
1T6B.pdb -156.518 5  
1UDI.pdb -311.854 2  
1VFB.pdb -227.228 3  
1WEJ.pdb -175.364 5  
1WQ1.pdb -237.277 3  
1XD3.pdb -275.048 3  
1XQS.pdb -167.711 5  
1Y64.pdb -98.4158 4  
1YVB.pdb -277.378 3  
1Z0K.pdb -330.2 2



1Z5Y.pdb -194.627 5  
 1ZHI.pdb -137.667 5  
 2AJF.pdb -211.92 3  
 2B42.pdb -401.066 1  
 2C0L.pdb -246.865 3  
 2CFH.pdb -784.149 1  
 2FD6.pdb -195.907 5  
 2H7V.pdb -222.925 3  
 2HLE.pdb -231.588 3  
 2HMI.pdb -87.5356 4  
 2HQS.pdb -186.229 5  
 2HRK.pdb -196.893 5  
 2I25.pdb -180.515 5  
 2JEL.pdb -281.384 3  
 2MTA.pdb -147.316 5  
 2NZ8.pdb -275.324 3  
 2O8V.pdb -197.512 5  
 2O0B.pdb -41.5053 4  
 2OT3.pdb -385.037 2  
 2PCC.pdb -81.9344 4  
 2QFW.pdb -208.647 3  
 2SIC.pdb -352.935 2  
 2SNI.pdb -320.712 2  
 2UUY.pdb -370.853 2  
 2VIS.pdb -244.655 3  
 7CEI.pdb -99.2515 4  
 \*\*\*\*\*

Group 21s-

# CAPRI T45 predictions - Furman Group, The Hebrew University, Jerusalem, Israel.

# Raw scores are the delta in polar solvent accessible surface area between the monomers apart and the complex

# and are given in units of Angstrom<sup>2</sup>.

#

| #Complex  | Raw score | normalized score |
|-----------|-----------|------------------|
| design_1  | -402.2 4  |                  |
| design_2  | -425.2 3  |                  |
| design_3  | -471.6 3  |                  |
| design_4  | -378.6 4  |                  |
| design_5  | -321.3 5  |                  |
| design_6  | -293.6 5  |                  |
| design_7  | -495.6 2  |                  |
| design_8  | -268.1 5  |                  |
| design_9  | -281.4 5  |                  |
| design_10 | -303.9 5  |                  |
| design_11 | -405.8 4  |                  |

|           |        |   |
|-----------|--------|---|
| design_12 | -430.3 | 3 |
| design_13 | -465.3 | 3 |
| design_14 | -263   | 5 |
| design_15 | -289.8 | 5 |
| design_16 | -388.1 | 4 |
| design_17 | -328.5 | 5 |
| design_18 | -398.5 | 4 |
| design_19 | -333.1 | 5 |
| design_20 | -466.1 | 3 |
| design_21 | -272.2 | 5 |
| design_22 | -259.7 | 5 |
| design_23 | -342.6 | 4 |
| design_24 | -378.4 | 4 |
| design_25 | -336.2 | 4 |
| design_26 | -446.8 | 3 |
| design_27 | -332.5 | 5 |
| design_28 | -278.6 | 5 |
| design_29 | -353   | 4 |
| design_30 | -498.6 | 2 |
| design_31 | -363.9 | 4 |
| design_32 | -185   | 5 |
| design_33 | -351.9 | 4 |
| design_34 | -468.2 | 3 |
| design_35 | -461.6 | 3 |
| design_36 | -406.2 | 4 |
| design_37 | -334.4 | 5 |
| design_38 | -332.5 | 5 |
| design_39 | -405.5 | 4 |
| design_40 | -380.1 | 4 |
| design_41 | -349   | 4 |
| design_42 | -417.9 | 3 |
| design_43 | -355.2 | 4 |
| design_44 | -461.6 | 3 |
| design_45 | -408   | 4 |
| design_46 | -340.9 | 4 |
| design_47 | -400.5 | 4 |
| design_48 | -294.9 | 5 |
| design_49 | -247.6 | 5 |
| design_50 | -325.5 | 5 |
| design_51 | -352.7 | 4 |
| design_52 | -610.3 | 2 |
| design_53 | -481.5 | 3 |
| design_54 | -361.9 | 4 |
| design_55 | -259.8 | 5 |
| design_56 | -321.7 | 5 |
| design_57 | -390.8 | 4 |

|           |         |   |
|-----------|---------|---|
| design_58 | -417.5  | 3 |
| design_59 | -373.5  | 4 |
| design_60 | -399.4  | 4 |
| design_61 | -478.9  | 3 |
| design_62 | -354.3  | 4 |
| design_63 | -422.3  | 3 |
| design_64 | -283.4  | 5 |
| design_65 | -498    | 2 |
| design_66 | -291.5  | 5 |
| design_67 | -446.3  | 3 |
| design_68 | -312.9  | 5 |
| design_69 | -321.7  | 5 |
| design_70 | -308.7  | 5 |
| design_71 | -298.7  | 5 |
| design_72 | -528    | 2 |
| design_73 | -358.2  | 4 |
| design_74 | -260.3  | 5 |
| design_75 | -314.5  | 5 |
| design_76 | -530.8  | 2 |
| design_77 | -449    | 3 |
| design_78 | -330.3  | 5 |
| design_79 | -434.9  | 3 |
| design_80 | -306.1  | 5 |
| design_81 | -474.8  | 3 |
| design_82 | -267.9  | 5 |
| design_83 | -321.7  | 5 |
| design_84 | -352.7  | 4 |
| design_85 | -324.6  | 5 |
| design_86 | -292.5  | 5 |
| design_87 | -344.2  | 4 |
| 1A2K      | -433.3  | 3 |
| 1ACB      | -347.2  | 4 |
| 1AHW      | -904.4  | 1 |
| 1AK4      | -216.7  | 5 |
| 1AKJ      | -961.8  | 1 |
| 1AVX      | -623.4  | 2 |
| 1AY7      | -478.8  | 3 |
| 1AZS      | -536.3  | 2 |
| 1B6C      | -491.1  | 3 |
| 1BGX      | -2287.7 | 1 |
| 1BJ1      | -630.2  | 2 |
| 1BKD      | -1150.7 | 1 |
| 1BUH      | -436.1  | 3 |
| 1BVK      | -468.7  | 3 |
| 1BVN      | -751.5  | 1 |
| 1CGI      | -547    | 2 |

|      |         |   |
|------|---------|---|
| 1D6R | -470.4  | 3 |
| 1DE4 | -753.7  | 1 |
| 1DFJ | -990.8  | 1 |
| 1DQJ | -714.9  | 1 |
| 1E4K | -339.2  | 4 |
| 1E6J | -334.5  | 4 |
| 1E96 | -376.8  | 4 |
| 1EAW | -580.2  | 2 |
| 1EER | -1219.9 | 1 |
| 1EFN | -411.5  | 3 |
| 1EWY | -617.1  | 2 |
| 1EZU | -798.9  | 1 |
| 1F34 | -1006   | 1 |
| 1F51 | -676.8  | 1 |
| 1FAK | -1123.3 | 1 |
| 1FC2 | -311.4  | 5 |
| 1FQ1 | -565.9  | 2 |
| 1FQJ | -640.2  | 2 |
| 1FSK | -626.8  | 2 |
| 1GCQ | -410.4  | 3 |
| 1GHQ | -222    | 5 |
| 1GLA | -480    | 3 |
| 1GP2 | -719.6  | 1 |
| 1GPW | -776.5  | 1 |
| 1GRN | -747    | 1 |
| 1H1V | -657.4  | 1 |
| 1HE1 | -575.1  | 2 |
| 1HE8 | -499.5  | 2 |
| 1HIA | -532.3  | 2 |
| 1I2M | -1276.7 | 1 |
| 1I4D | -466.1  | 3 |
| 1I9R | -654.2  | 2 |
| 1IB1 | -1020.5 | 1 |
| 1IBR | -1315   | 1 |
| 1IJK | -563.2  | 2 |
| 1IQD | -665.7  | 1 |
| 1IRA | -1103.4 | 1 |
| 1J2J | -207.2  | 5 |
| 1JMO | -1268.4 | 1 |
| 1JPS | -810.1  | 1 |
| 1K4C | -507.5  | 2 |
| 1K5D | -866.9  | 1 |
| 1K74 | -708.7  | 1 |
| 1KAC | -383.8  | 4 |
| 1KKL | -499.6  | 2 |
| 1KLU | -384    | 4 |

|      |         |   |
|------|---------|---|
| 1KTZ | -253.1  | 5 |
| 1KXP | -1003   | 1 |
| 1KXQ | -667.8  | 1 |
| 1M10 | -842.6  | 1 |
| 1MAH | -575.1  | 2 |
| 1ML0 | -747.7  | 1 |
| 1MLC | -493.7  | 2 |
| 1N2C | -1314.2 | 1 |
| 1N80 | -456.2  | 3 |
| 1NCA | -701.6  | 1 |
| 1NSN | -635.4  | 2 |
| 1NW9 | -514.8  | 2 |
| 1OPH | -378.4  | 4 |
| 1PPE | -494.9  | 2 |
| 1PXV | -684.4  | 1 |
| 1QA9 | -566.4  | 2 |
| 1QFW | -596.4  | 2 |
| 1R0R | -348.9  | 4 |
| 1R8S | -761.5  | 1 |
| 1RLB | -488    | 3 |
| 1S1Q | -417.7  | 3 |
| 1SBB | -353.4  | 4 |
| 1T6B | -621.5  | 2 |
| 1UDI | -616.6  | 2 |
| 1VFB | -553.4  | 2 |
| 1WEJ | -530.2  | 2 |
| 1WQ1 | -1040   | 1 |
| 1XD3 | -649.5  | 2 |
| 1XQS | -1027.4 | 1 |
| 1Y64 | -789.7  | 1 |
| 1YVB | -389.9  | 4 |
| 1Z0K | -600.4  | 2 |
| 1Z5Y | -412.9  | 3 |
| 1ZHI | -442.1  | 3 |
| 2AJF | -572.3  | 2 |
| 2B42 | -983.5  | 1 |
| 2C0L | -470.2  | 3 |
| 2CFH | -543    | 2 |
| 2FD6 | -415    | 3 |
| 2H7V | -473.1  | 3 |
| 2HLE | -673.5  | 1 |
| 2HMI | -351    | 4 |
| 2HQS | -788.1  | 1 |
| 2HRK | -310.3  | 5 |
| 2I25 | -607.7  | 2 |
| 2JEL | -551.4  | 2 |

|      |        |   |
|------|--------|---|
| 2MTA | -314.2 | 5 |
| 2NZ8 | -754   | 1 |
| 208V | -416.5 | 3 |
| 200B | -116.2 | 5 |
| 20T3 | -595.3 | 2 |
| 2PCC | -402.4 | 4 |
| 2QFW | -478.8 | 3 |
| 2SIC | -455.8 | 3 |
| 2SNI | -486.3 | 3 |
| 2UUY | -396.6 | 4 |
| 2VIS | -447.1 | 3 |
| 7CEI | -607.1 | 2 |

\*\*\*\*\*

Group 22s-

Raw scores are a product of SVM classification

|      | Raw score | normalized score |
|------|-----------|------------------|
| 1a2k | 1         | 1                |
| 1acb | 1         | 1                |
| 1ahw | 1         | 1                |
| 1ak4 | 0         | 4                |
| 1akj | 0         | 4                |
| 1avx | 1         | 1                |
| 1ay7 | 0         | 4                |
| 1azs | 1         | 1                |
| 1b6c | 1         | 1                |
| 1bgx | 1         | 1                |
| 1bj1 | 0         | 4                |
| 1bkd | 1         | 1                |
| 1buh | 0         | 4                |
| 1bvk | 0         | 4                |
| 1bvn | 0         | 4                |
| 1cgi | 0         | 4                |
| 1d6r | 0         | 4                |
| 1de4 | 1         | 1                |
| 1dfj | 1         | 1                |
| 1dqj | 0         | 4                |
| 1e4k | 0         | 4                |
| 1e6j | 0         | 4                |
| 1e96 | 0         | 4                |
| 1eaw | 1         | 1                |
| 1eer | 1         | 1                |
| 1efn | 0         | 4                |
| 1ewy | 0         | 4                |
| 1ezu | 1         | 1                |
| 1f34 | 1         | 1                |

|      |   |   |
|------|---|---|
| 1f51 | 1 | 1 |
| 1fak | 1 | 1 |
| 1fc2 | 0 | 4 |
| 1fq1 | 1 | 1 |
| 1fqj | 0 | 4 |
| 1fsk | 0 | 4 |
| 1gcq | 0 | 4 |
| 1ghq | 0 | 4 |
| 1gla | 0 | 4 |
| 1gp2 | 1 | 1 |
| 1gpw | 1 | 1 |
| 1grn | 1 | 1 |
| 1h1v | 0 | 4 |
| 1he1 | 1 | 1 |
| 1he8 | 0 | 4 |
| 1hia | 1 | 1 |
| 1i2m | 1 | 1 |
| 1i4d | 1 | 1 |
| 1i9r | 0 | 4 |
| 1ib1 | 1 | 1 |
| 1ibr | 1 | 1 |
| 1ijk | 0 | 4 |
| 1iqd | 1 | 1 |
| 1ira | 1 | 1 |
| 1j2j | 0 | 4 |
| 1jmo | 1 | 1 |
| 1jps | 1 | 1 |
| 1k4c | 0 | 4 |
| 1k5d | 1 | 1 |
| 1k74 | 1 | 1 |
| 1kac | 0 | 4 |
| 1kkl | 0 | 4 |
| 1klu | 0 | 4 |
| 1ktz | 0 | 4 |
| 1kxp | 1 | 1 |
| 1kxq | 0 | 4 |
| 1m10 | 1 | 1 |
| 1mah | 1 | 1 |
| 1ml0 | 1 | 1 |
| 1mlc | 0 | 4 |
| 1n2c | 1 | 1 |
| 1n8o | 1 | 1 |
| 1nca | 0 | 4 |
| 1nsn | 0 | 4 |
| 1nw9 | 1 | 1 |
| 1oph | 0 | 4 |

|          |   |   |
|----------|---|---|
| 1ppe     | 1 | 1 |
| 1pxv     | 0 | 4 |
| 1qa9     | 0 | 4 |
| 1qfw     | 0 | 4 |
| 1r0r     | 0 | 4 |
| 1r8s     | 1 | 1 |
| 1rlb     | 0 | 4 |
| 1s1q     | 0 | 4 |
| 1sbb     | 0 | 4 |
| 1t6b     | 1 | 1 |
| 1udi     | 1 | 1 |
| 1vfb     | 0 | 4 |
| 1wej     | 0 | 4 |
| 1wq1     | 1 | 1 |
| 1xd3     | 1 | 1 |
| 1xqs     | 1 | 1 |
| 1y64     | 0 | 4 |
| 1yvb     | 0 | 4 |
| 1z0k     | 1 | 1 |
| 1z5y     | 0 | 4 |
| 1zhi     | 0 | 4 |
| 2ajf     | 0 | 4 |
| 2b42     | 1 | 1 |
| 2c0l     | 1 | 1 |
| 2cfh     | 1 | 1 |
| 2fd6     | 0 | 4 |
| 2h7v     | 0 | 4 |
| 2hle     | 1 | 1 |
| 2hmi     | 0 | 4 |
| 2hqs     | 1 | 1 |
| 2hrk     | 0 | 4 |
| 2i25     | 0 | 4 |
| 2jel     | 0 | 4 |
| 2mta     | 0 | 4 |
| 2nz8     | 1 | 1 |
| 2o8v     | 0 | 4 |
| 2oob     | 0 | 4 |
| 2ot3     | 1 | 1 |
| 2pcc     | 0 | 4 |
| 2qfw     | 0 | 4 |
| 2sic     | 0 | 4 |
| 2sni     | 1 | 1 |
| 2uuy     | 0 | 4 |
| 2vis     | 0 | 4 |
| 7cei     | 1 | 1 |
| design_1 | 0 | 4 |



|           |   |   |
|-----------|---|---|
| design_2  | 0 | 4 |
| design_3  | 0 | 4 |
| design_4  | 0 | 4 |
| design_5  | 0 | 4 |
| design_6  | 0 | 4 |
| design_7  | 0 | 4 |
| design_8  | 0 | 4 |
| design_9  | 0 | 4 |
| design_10 | 0 | 4 |
| design_11 | 0 | 4 |
| design_12 | 0 | 4 |
| design_13 | 0 | 4 |
| design_14 | 0 | 4 |
| design_15 | 0 | 4 |
| design_16 | 0 | 4 |
| design_17 | 0 | 4 |
| design_18 | 0 | 4 |
| design_19 | 0 | 4 |
| design_20 | 1 | 1 |
| design_21 | 0 | 4 |
| design_22 | 0 | 4 |
| design_23 | 0 | 4 |
| design_24 | 0 | 4 |
| design_25 | 0 | 4 |
| design_26 | 0 | 4 |
| design_27 | 0 | 4 |
| design_28 | 0 | 4 |
| design_29 | 0 | 4 |
| design_30 | 1 | 1 |
| design_31 | 0 | 4 |
| design_32 | 0 | 4 |
| design_33 | 0 | 4 |
| design_34 | 0 | 4 |
| design_35 | 0 | 4 |
| design_36 | 0 | 4 |
| design_37 | 0 | 4 |
| design_38 | 1 | 1 |
| design_39 | 0 | 4 |
| design_40 | 0 | 4 |
| design_41 | 0 | 4 |
| design_42 | 0 | 4 |
| design_43 | 0 | 4 |
| design_44 | 0 | 4 |
| design_45 | 0 | 4 |
| design_46 | 0 | 4 |
| design_47 | 0 | 4 |

|           |   |   |
|-----------|---|---|
| design_48 | 0 | 4 |
| design_49 | 0 | 4 |
| design_50 | 0 | 4 |
| design_51 | 0 | 4 |
| design_52 | 0 | 4 |
| design_53 | 0 | 4 |
| design_54 | 0 | 4 |
| design_55 | 0 | 4 |
| design_56 | 0 | 4 |
| design_57 | 0 | 4 |
| design_58 | 0 | 4 |
| design_59 | 0 | 4 |
| design_60 | 0 | 4 |
| design_61 | 0 | 4 |
| design_62 | 0 | 4 |
| design_63 | 0 | 4 |
| design_64 | 0 | 4 |
| design_65 | 0 | 4 |
| design_66 | 0 | 4 |
| design_67 | 0 | 4 |
| design_68 | 0 | 4 |
| design_69 | 0 | 4 |
| design_70 | 0 | 4 |
| design_71 | 1 | 1 |
| design_72 | 0 | 4 |
| design_73 | 0 | 4 |
| design_74 | 0 | 4 |
| design_75 | 0 | 4 |
| design_76 | 0 | 4 |
| design_77 | 0 | 4 |
| design_78 | 0 | 4 |
| design_79 | 0 | 4 |
| design_80 | 0 | 4 |
| design_81 | 0 | 4 |
| design_82 | 0 | 4 |
| design_83 | 0 | 4 |
| design_84 | 0 | 4 |
| design_85 | 0 | 4 |
| design_86 | 0 | 4 |
| design_87 | 0 | 4 |

\*\*\*\*\*

Group 23s-

\*Models with "-" could not be calculated the scores.

### Normalized score ###

|                            |                       |
|----------------------------|-----------------------|
| Score $\geq 0.5$           | 1(bind)               |
| $0 \leq$ Score $< 0.5$     | 2(likely to bind)     |
| $-0.5 \leq$ Score $< 0$    | 5(uncertain)          |
| $-1.0 \leq$ Score $< -0.5$ | 3(likely not to bind) |
| Score $< -1.0$             | 4(does not to bind)   |

| Model     | Raw score | Normazied score |
|-----------|-----------|-----------------|
| design_1  | -2.027    | 4               |
| design_2  | -2.570    | 4               |
| design_3  | -1.651    | 4               |
| design_4  | -0.550    | 3               |
| design_5  | -0.930    | 3               |
| design_6  | 0.743     | 1               |
| design_7  | -0.872    | 3               |
| design_8  | -0.049    | 5               |
| design_9  | -1.507    | 4               |
| design_10 | -2.515    | 4               |
| design_11 | -1.534    | 4               |
| design_12 | -2.349    | 4               |
| design_13 | -0.316    | 5               |
| design_14 | -1.487    | 4               |
| design_15 | -1.042    | 4               |
| design_16 | -1.709    | 4               |
| design_17 | -1.804    | 4               |
| design_18 | -1.604    | 4               |
| design_19 | -0.433    | 5               |
| design_20 | 0.070     | 2               |
| design_21 | -0.685    | 3               |
| design_22 | 0.166     | 2               |
| design_23 | -1.127    | 4               |
| design_24 | -0.026    | 5               |
| design_25 | 0.165     | 2               |
| design_26 | 0.273     | 2               |
| design_27 | -0.155    | 5               |
| design_28 | -1.155    | 4               |
| design_29 | -0.044    | 5               |
| design_30 | -1.719    | 4               |
| design_31 | -         | -               |
| design_32 | -1.570    | 4               |
| design_33 | -0.387    | 5               |
| design_34 | -1.055    | 4               |
| design_35 | -1.607    | 4               |
| design_36 | -1.709    | 4               |
| design_37 | 0.155     | 2               |
| design_38 | 0.347     | 2               |

|           |        |   |
|-----------|--------|---|
| design_39 | -2.123 | 4 |
| design_40 | -0.099 | 5 |
| design_41 | -2.217 | 4 |
| design_42 | -0.902 | 3 |
| design_43 | -      | - |
| design_44 | -1.960 | 4 |
| design_45 | -2.476 | 4 |
| design_46 | -2.032 | 4 |
| design_47 | -1.427 | 4 |
| design_48 | -2.758 | 4 |
| design_49 | -2.213 | 4 |
| design_50 | -1.425 | 4 |
| design_51 | 0.187  | 2 |
| design_52 | -1.421 | 4 |
| design_53 | -0.308 | 5 |
| design_54 | -2.393 | 4 |
| design_55 | -1.279 | 4 |
| design_56 | -2.406 | 4 |
| design_57 | -0.832 | 3 |
| design_58 | -2.342 | 4 |
| design_59 | -1.060 | 4 |
| design_60 | -2.726 | 4 |
| design_61 | 0.651  | 1 |
| design_62 | -1.008 | 4 |
| design_63 | 0.480  | 2 |
| design_64 | -1.642 | 4 |
| design_65 | -0.691 | 3 |
| design_66 | -0.590 | 3 |
| design_67 | -1.992 | 4 |
| design_68 | -0.924 | 3 |
| design_69 | 0.262  | 2 |
| design_70 | 0.199  | 2 |
| design_71 | -0.771 | 3 |
| design_72 | 0.290  | 2 |
| design_73 | -0.380 | 5 |
| design_74 | -2.441 | 4 |
| design_75 | -0.398 | 5 |
| design_76 | -1.682 | 4 |
| design_77 | 0.151  | 2 |
| design_78 | 0.625  | 1 |
| design_79 | -2.099 | 4 |
| design_80 | -1.453 | 4 |
| design_81 | -1.052 | 4 |
| design_82 | -0.714 | 3 |
| design_83 | 0.442  | 2 |
| design_84 | 0.062  | 2 |

|           |        |   |
|-----------|--------|---|
| design_85 | -0.353 | 5 |
| design_86 | -1.959 | 4 |
| design_87 | -0.520 | 3 |
| 1A2K      | 0.658  | 1 |
| 1ACB      | -0.105 | 5 |
| 1AHW      | 0.719  | 1 |
| 1AK4      | -0.610 | 3 |
| 1AKJ      | 0.311  | 2 |
| 1AVX      | 0.422  | 2 |
| 1AY7      | -0.908 | 3 |
| 1AZS      | 0.364  | 2 |
| 1B6C      | -0.207 | 5 |
| 1BGX      | 0.570  | 1 |
| 1BJ1      | -0.499 | 5 |
| 1BKD      | 0.185  | 2 |
| 1BUH      | -1.118 | 4 |
| 1BVK      | -0.870 | 3 |
| 1BVN      | -0.992 | 3 |
| 1CGI      | -0.204 | 5 |
| 1D6R      | -0.164 | 5 |
| 1DE4      | -      | - |
| 1DFJ      | 0.058  | 2 |
| 1DQJ      | -1.024 | 4 |
| 1E4K      | 0.320  | 2 |
| 1E6J      | 0.551  | 1 |
| 1E96      | 0.626  | 1 |
| 1EAW      | 0.593  | 1 |
| 1EER      | 1.764  | 1 |
| 1EFN      | 0.114  | 2 |
| 1EWY      | -0.825 | 3 |
| 1EZU      | -0.880 | 3 |
| 1F34      | -0.282 | 5 |
| 1F51      | -0.516 | 3 |
| 1FAK      | -0.463 | 5 |
| 1FC2      | -1.410 | 4 |
| 1FQ1      | 0.264  | 2 |
| 1FQJ      | -0.087 | 5 |
| 1FSK      | -0.756 | 3 |
| 1GCCQ     | -0.874 | 3 |
| 1GHQ      | -1.729 | 4 |
| 1GLA      | 0.011  | 2 |
| 1GP2      | 0.203  | 2 |
| 1GPW      | 0.908  | 1 |
| 1GRN      | 0.721  | 1 |
| 1H1V      | -1.842 | 4 |
| 1HE1      | 0.359  | 2 |

|      |        |   |
|------|--------|---|
| 1HE8 | -0.046 | 5 |
| 1HIA | 0.211  | 2 |
| 1I2M | 0.964  | 1 |
| 1I4D | -1.195 | 4 |
| 1I9R | -0.074 | 5 |
| 1IB1 | -0.054 | 5 |
| 1IBR | 1.106  | 1 |
| 1IJK | 0.833  | 1 |
| 1IQD | -0.537 | 3 |
| 1IRA | 0.800  | 1 |
| 1J2J | 0.117  | 2 |
| 1JMO | -      | - |
| 1JPS | 0.696  | 1 |
| 1K4C | 0.275  | 2 |
| 1K5D | 0.193  | 2 |
| 1K74 | 0.874  | 1 |
| 1KAC | 0.165  | 2 |
| 1KKL | -0.360 | 5 |
| 1KLU | -0.633 | 3 |
| 1KTZ | 0.007  | 2 |
| 1KXP | 1.236  | 1 |
| 1KXQ | 0.392  | 2 |
| 1M10 | 0.045  | 2 |
| 1MAH | 1.153  | 1 |
| 1ML0 | 1.189  | 1 |
| 1MLC | -0.379 | 5 |
| 1N2C | -      | - |
| 1N80 | -1.292 | 4 |
| 1NCA | -0.401 | 5 |
| 1NSN | -0.321 | 5 |
| 1NW9 | -0.297 | 5 |
| 1OPH | 0.260  | 2 |
| 1PPE | 0.398  | 2 |
| 1PXV | 0.465  | 2 |
| 1QA9 | -0.187 | 5 |
| 1QFW | 0.271  | 2 |
| 1R0R | -0.878 | 3 |
| 1R8S | 0.860  | 1 |
| 1RLB | -0.112 | 5 |
| 1S1Q | -0.878 | 3 |
| 1SBB | -0.843 | 3 |
| 1T6B | -1.107 | 4 |
| 1UDI | 0.975  | 1 |
| 1VFB | -1.011 | 4 |
| 1WEJ | -0.192 | 5 |
| 1WQ1 | 1.010  | 1 |

|      |        |   |
|------|--------|---|
| 1XD3 | 0.905  | 1 |
| 1XQS | 0.967  | 1 |
| 1Y64 | 0.495  | 2 |
| 1YVB | -      | - |
| 1Z0K | -0.122 | 5 |
| 1Z5Y | -0.713 | 3 |
| 1ZHI | 0.459  | 2 |
| 2AJF | -0.224 | 5 |
| 2B42 | -0.024 | 5 |
| 2C0L | 0.425  | 2 |
| 2CFH | 0.948  | 1 |
| 2FD6 | -      | - |
| 2H7V | -      | - |
| 2HLE | 0.626  | 1 |
| 2HMI | -0.023 | 5 |
| 2HQS | -0.014 | 5 |
| 2HRK | 0.075  | 2 |
| 2I25 | -0.591 | 3 |
| 2JEL | -2.441 | 4 |
| 2MTA | 0.104  | 2 |
| 2NZ8 | 0.131  | 2 |
| 2O8V | -0.199 | 5 |
| 2O0B | -0.384 | 5 |
| 2OT3 | 1.074  | 1 |
| 2PCC | 0.758  | 1 |
| 2QFW | -1.011 | 4 |
| 2SIC | -1.010 | 4 |
| 2SNI | 0.118  | 2 |
| 2UUY | 0.030  | 2 |
| 2VIS | -0.568 | 3 |
| 7CEI | 0.809  | 1 |

\*\*\*\*\*

Group 24s-

REMARK Submission from Group 24s

REMARK Oregon State University

REMARK Victor Hsu - hsu AT onid.orst.edu

REMARK Camden Driggers - driggers AT science.oregonstate.edu

REMARK Robert Hall - hallro AT onid.orst.edu

REMARK Jessica Morgan - morganje AT onid.orst.edu

Raw scores are given in arbitrary units

design\_1 8.46 3

design\_2 7.97 2

|           |       |   |
|-----------|-------|---|
| design_3  | 6.83  | 1 |
| design_4  | 5.71  | 1 |
| design_5  | 7.85  | 2 |
| design_6  | 7.33  | 2 |
| design_7  | 5.54  | 1 |
| design_8  | 10.38 | 4 |
| design_9  | 6.48  | 1 |
| design_10 | 9.84  | 4 |
| design_11 | 5.19  | 1 |
| design_12 | 7.70  | 2 |
| design_13 | 11.63 | 4 |
| design_14 | 11.94 | 4 |
| design_15 | 6.81  | 1 |
| design_16 | 6.70  | 1 |
| design_17 | 8.27  | 3 |
| design_18 | 7.02  | 2 |
| design_19 | 6.79  | 1 |
| design_20 | 8.30  | 3 |
| design_21 | 8.81  | 3 |
| design_22 | 10.12 | 4 |
| design_23 | 9.94  | 4 |
| design_24 | 6.69  | 1 |
| design_25 | 7.90  | 2 |
| design_26 | 7.14  | 2 |
| design_27 | 8.25  | 3 |
| design_28 | 6.78  | 1 |
| design_29 | 6.40  | 1 |
| design_30 | 7.80  | 2 |
| design_31 | 7.55  | 2 |
| design_32 | 7.56  | 2 |
| design_33 | 8.48  | 3 |
| design_34 | 12.84 | 4 |
| design_35 | 11.09 | 4 |
| design_36 | 6.90  | 1 |
| design_37 | 8.01  | 3 |
| design_38 | 9.56  | 4 |
| design_39 | 7.13  | 2 |
| design_40 | 6.52  | 1 |
| design_41 | 8.06  | 3 |
| design_42 | 8.80  | 3 |
| design_43 | 6.30  | 1 |
| design_44 | 10.10 | 4 |
| design_45 | 14.11 | 4 |
| design_46 | 9.43  | 4 |
| design_47 | 9.92  | 4 |
| design_48 | 17.18 | 4 |



|           |       |   |
|-----------|-------|---|
| design_49 | 23.82 | 4 |
| design_50 | 6.66  | 1 |
| design_51 | 9.45  | 4 |
| design_52 | 4.59  | 1 |
| design_53 | 6.69  | 1 |
| design_54 | 8.71  | 3 |
| design_55 | 9.17  | 4 |
| design_56 | 16.10 | 4 |
| design_57 | 5.25  | 1 |
| design_58 | 6.34  | 1 |
| design_59 | 5.65  | 1 |
| design_60 | 7.34  | 2 |
| design_61 | 7.00  | 2 |
| design_62 | 8.32  | 3 |
| design_63 | 6.80  | 1 |
| design_64 | 6.22  | 1 |
| design_65 | 4.93  | 1 |
| design_66 | 10.04 | 4 |
| design_67 | 5.76  | 1 |
| design_68 | 6.82  | 1 |
| design_69 | 5.96  | 1 |
| design_70 | 8.39  | 3 |
| design_71 | 9.29  | 4 |
| design_72 | 5.73  | 1 |
| design_73 | 5.68  | 1 |
| design_74 | 8.55  | 3 |
| design_75 | 9.55  | 4 |
| design_76 | 6.56  | 1 |
| design_77 | 7.43  | 2 |
| design_78 | 16.14 | 4 |
| design_79 | 7.26  | 2 |
| design_80 | 7.30  | 2 |
| design_81 | 5.95  | 1 |
| design_82 | 9.68  | 4 |
| design_83 | 11.38 | 4 |
| design_84 | 8.86  | 3 |
| design_85 | 9.30  | 4 |
| design_86 | 7.48  | 2 |
| design_87 | 7.55  | 2 |
| 1A2K      | 5.55  | 1 |
| 1ACB      | 12.58 | 4 |
| 1AHW      | 4.51  | 1 |
| 1AK4      | 8.11  | 3 |
| 1AKJ      | 3.48  | 1 |
| 1ATN      | 6.78  | 1 |
| 1AVX      | 7.08  | 2 |

|      |       |   |
|------|-------|---|
| 1AY7 | 4.38  | 1 |
| 1AZS | 8.74  | 3 |
| 1B6C | 8.47  | 3 |
| 1BGX | 8.38  | 3 |
| 1BJ1 | 9.39  | 4 |
| 1BKD | 5.74  | 1 |
| 1BUH | 5.98  | 1 |
| 1BVK | 5.97  | 1 |
| 1BVN | 8.64  | 3 |
| 1CGI | 10.10 | 4 |
| 1D6R | 4.85  | 1 |
| 1DE4 | 7.60  | 2 |
| 1DFJ | 4.94  | 1 |
| 1DQJ | 5.52  | 1 |
| 1E4K | 5.92  | 1 |
| 1E6E | 4.25  | 1 |
| 1E6J | 7.01  | 2 |
| 1E96 | 5.10  | 1 |
| 1EAW | 6.02  | 1 |
| 1EER | 5.80  | 1 |
| 1EFN | 5.37  | 1 |
| 1EWY | 3.78  | 1 |
| 1EZU | 7.94  | 2 |
| 1F34 | 6.76  | 1 |
| 1F51 | 5.58  | 1 |
| 1FAK | 5.94  | 1 |
| 1FC2 | 12.94 | 4 |
| 1FQ1 | 4.93  | 1 |
| 1FQJ | 4.34  | 1 |
| 1FSK | 5.90  | 1 |
| 1GCQ | 6.46  | 1 |
| 1GHQ | 3.47  | 1 |
| 1GLA | 5.06  | 1 |
| 1GP2 | 5.39  | 1 |
| 1GPW | 5.16  | 1 |
| 1GRN | 5.11  | 1 |
| 1H1V | 5.43  | 1 |
| 1HE1 | 7.50  | 2 |
| 1HE8 | 3.59  | 1 |
| 1HIA | 6.21  | 1 |
| 1I2M | 4.91  | 1 |
| 1I4D | 10.01 | 4 |
| 1I9R | 4.49  | 1 |
| 1IB1 | 4.95  | 1 |
| 1IBR | 5.25  | 1 |
| 1IJK | 4.82  | 1 |

|      |       |   |
|------|-------|---|
| 1IQD | 6.30  | 1 |
| 1IRA | 5.91  | 1 |
| 1J2J | 8.12  | 3 |
| 1JMO | 6.94  | 1 |
| 1JPS | 4.54  | 1 |
| 1K4C | 5.74  | 1 |
| 1K5D | 5.92  | 1 |
| 1K74 | 4.33  | 1 |
| 1KAC | 4.62  | 1 |
| 1KKL | 4.88  | 1 |
| 1KLU | 5.87  | 1 |
| 1KTZ | 5.03  | 1 |
| 1KXP | 6.39  | 1 |
| 1KXQ | 8.63  | 3 |
| 1M10 | 4.88  | 1 |
| 1MAH | 6.43  | 1 |
| 1ML0 | 7.01  | 2 |
| 1MLC | 6.65  | 1 |
| 1N2C | 5.94  | 1 |
| 1N80 | 8.63  | 3 |
| 1NCA | 5.27  | 1 |
| 1NSN | 5.66  | 1 |
| 1NW9 | 11.09 | 4 |
| 1OPH | 5.58  | 1 |
| 1PPE | 6.86  | 1 |
| 1PXV | 6.88  | 1 |
| 1QA9 | 2.86  | 1 |
| 1QFW | 7.84  | 2 |
| 1QFW | 5.09  | 1 |
| 1R0R | 8.45  | 3 |
| 1R8S | 6.94  | 1 |
| 1RLB | 5.54  | 1 |
| 1S1Q | 7.21  | 2 |
| 1SBB | 9.25  | 4 |
| 1T6B | 4.65  | 1 |
| 1TMQ | 6.93  | 1 |
| 1UDI | 5.52  | 1 |
| 1VFB | 6.09  | 1 |
| 1WEJ | 4.10  | 1 |
| 1WQ1 | 4.97  | 1 |
| 1XD3 | 5.35  | 1 |
| 1XQS | 4.29  | 1 |
| 1Y64 | 4.85  | 1 |
| 1YVB | 6.60  | 1 |
| 1Z0K | 5.00  | 1 |
| 1Z5Y | 12.10 | 4 |

|      |      |   |
|------|------|---|
| 1ZHI | 4.88 | 1 |
| 2AJF | 7.36 | 2 |
| 2B42 | 7.18 | 2 |
| 2BTF | 5.02 | 1 |
| 2C0L | 4.95 | 1 |
| 2CFH | 7.16 | 2 |
| 2FD6 | 6.43 | 1 |
| 2H7V | 5.54 | 1 |
| 2HLE | 5.83 | 1 |
| 2HMI | 8.77 | 3 |
| 2HQS | 5.44 | 1 |
| 2HRK | 8.13 | 3 |
| 2i25 | 4.58 | 1 |
| 2JEL | 6.21 | 1 |
| 2MTA | 6.75 | 1 |
| 2NZ8 | 6.52 | 1 |
| 2O8V | 6.05 | 1 |
| 2O0B | 8.25 | 3 |
| 2OT3 | 8.89 | 3 |
| 2PCC | 3.69 | 1 |
| 2SIC | 7.09 | 2 |
| 2SNI | 7.02 | 2 |
| 2UUY | 6.87 | 1 |
| 2VIS | 6.41 | 1 |
| 7CEI | 3.73 | 1 |

\*\*\*\*\*

Group 26s-

The following table is our scoring results for CAPRI Round 21 (our participant code is 26s). Three columns were prepared according to the format requirements. Raw scores were normalized as:

- 1 binds
- 2 likely to bind
- 3 likely not to bind
- 4 does not bind

If there is something missed, please contact me as soon as possible.

Bests,  
Jian

| Model ID | Raw Score | Normalized Score |
|----------|-----------|------------------|
| 1A2K     | -4.3033   | 2                |
| 1ACB     | -4.0664   | 2                |
| 1AHW     | -4.3285   | 1                |
| 1AK4     | -2.6089   | 4                |
| 1AKJ     | -2.9691   | 3                |

|      |         |   |
|------|---------|---|
| 1AVX | -4.9187 | 1 |
| 1AY7 | -2.6741 | 4 |
| 1AZS | -4.229  | 2 |
| 1B6C | -3.1844 | 4 |
| 1BGX | -9.868  | 1 |
| 1BJ1 | -4.439  | 2 |
| 1BKD | -7.7723 | 1 |
| 1BUH | -2.8412 | 4 |
| 1BVK | -2.0767 | 4 |
| 1BVN | -4.9685 | 1 |
| 1CGI | -5.3519 | 2 |
| 1D6R | -3.3038 | 4 |
| 1DE4 | -3.52   | 3 |
| 1DFJ | -4.4911 | 1 |
| 1DQJ | -4.3985 | 1 |
| 1E4K | -2.9954 | 4 |
| 1E6J | -3.4832 | 4 |
| 1E96 | -2.6764 | 4 |
| 1EAW | -4.6466 | 2 |
| 1EER | -8.026  | 1 |
| 1EFN | -3.7208 | 4 |
| 1EWY | -1.8186 | 3 |
| 1EZU | -6.2556 | 1 |
| 1F34 | -6.3977 | 2 |
| 1F51 | -4.2641 | 2 |
| 1FAK | -5.4979 | 1 |
| 1FC2 | -2.9652 | 4 |
| 1FQ1 | -3.1673 | 4 |
| 1FQJ | -3.0386 | 3 |
| 1FSK | -4.6558 | 1 |
| 1GCQ | -3.1267 | 4 |
| 1GHQ | -1.2898 | 4 |
| 1GLA | -2.3857 | 4 |
| 1GP2 | -5.196  | 1 |
| 1GPW | -4.85   | 1 |
| 1GRN | -5.5872 | 1 |
| 1H1V | -3.949  | 3 |
| 1HE1 | -5.6012 | 2 |
| 1HE8 | -3.6117 | 4 |
| 1HIA | -3.911  | 4 |
| 1I2M | -6.764  | 1 |
| 1I4D | -3.8979 | 4 |
| 1I9R | -3.151  | 3 |
| 1IB1 | -4.6806 | 1 |
| 1IBR | -8.4036 | 1 |
| 1IJK | -4.4034 | 2 |

|      |         |   |
|------|---------|---|
| 1IQD | -5.4772 | 2 |
| 1IRA | -6.2854 | 1 |
| 1J2J | -2.7905 | 4 |
| 1JMO | -8.523  | 1 |
| 1JPS | -3.886  | 3 |
| 1K4C | -4.9217 | 2 |
| 1K5D | -5.52   | 1 |
| 1K74 | -4.946  | 1 |
| 1KAC | -3.3382 | 4 |
| 1KKL | -2.8362 | 4 |
| 1KLU | -2.591  | 3 |
| 1KTZ | -3.0264 | 4 |
| 1KXP | -6.593  | 1 |
| 1KXQ | -6.1849 | 1 |
| 1M10 | -4.4808 | 1 |
| 1MAH | -5.0261 | 2 |
| 1ML0 | -6.4384 | 2 |
| 1MLC | -4.0621 | 2 |
| 1N2C | -10.509 | 1 |
| 1N80 | -4.2532 | 2 |
| 1NCA | -4.594  | 1 |
| 1NSN | -2.7432 | 3 |
| 1NW9 | -6.1887 | 2 |
| 1OPH | -2.7911 | 4 |
| 1PPE | -4.3636 | 2 |
| 1PXV | -5.6637 | 1 |
| 1QA9 | -3.0818 | 3 |
| 1QFW | -3.5917 | 4 |
| 1R0R | -4.7221 | 2 |
| 1R8S | -8.3683 | 2 |
| 1RLB | -2.6078 | 4 |
| 1S1Q | -2.0272 | 4 |
| 1SBB | -1.8749 | 4 |
| 1T6B | -4.1407 | 1 |
| 1UDI | -3.9641 | 4 |
| 1VFB | -2.5329 | 4 |
| 1WEJ | -3.311  | 3 |
| 1WQ1 | -6.5023 | 1 |
| 1XD3 | -5.91   | 2 |
| 1XQS | -5.096  | 1 |
| 1Y64 | -3.647  | 3 |
| 1YVB | -3.6384 | 4 |
| 1Z0K | -4.0704 | 2 |
| 1Z5Y | -4.4255 | 2 |
| 1ZHI | -2.6248 | 4 |
| 2AJF | -3.9928 | 3 |

|           |         |   |
|-----------|---------|---|
| 2B42      | -6.1402 | 1 |
| 2C0L      | -4.0636 | 2 |
| 2CFH      | -7.639  | 2 |
| 2FD6      | -3.743  | 4 |
| 2H7V      | -3.8826 | 4 |
| 2HLE      | -4.2059 | 2 |
| 2HMI      | -2.358  | 4 |
| 2HQS      | -3.7274 | 3 |
| 2HRK      | -3.0518 | 4 |
| 2I25      | -4.1498 | 2 |
| 2JEL      | -2.344  | 4 |
| 2MTA      | -1.6688 | 4 |
| 2NZ8      | -5.143  | 1 |
| 2O8V      | -4.5027 | 2 |
| 2O0B      | -1.5714 | 4 |
| 2OT3      | -5.6468 | 2 |
| 2PCC      | -1.9434 | 4 |
| 2QFW      | -2.628  | 4 |
| 2SIC      | -5.0128 | 2 |
| 2SNI      | -4.9204 | 2 |
| 2UUY      | -3.9187 | 4 |
| 2VIS      | -3.395  | 4 |
| 7CEI      | -4.7854 | 2 |
| design_1  | -2.5501 | 4 |
| design_2  | -2.6796 | 4 |
| design_3  | -4.2356 | 2 |
| design_4  | -2.3435 | 3 |
| design_5  | -2.5629 | 4 |
| design_6  | -1.9154 | 4 |
| design_7  | -3.3333 | 3 |
| design_8  | -2.2382 | 4 |
| design_9  | -2.2556 | 4 |
| design_10 | -3.4009 | 4 |
| design_11 | -2.7611 | 4 |
| design_12 | -4.5416 | 2 |
| design_13 | -2.6238 | 4 |
| design_14 | -2.5561 | 4 |
| design_15 | -1.4823 | 4 |
| design_16 | -2.8196 | 4 |
| design_17 | -2.7862 | 4 |
| design_18 | -3.0472 | 4 |
| design_19 | -2.1024 | 4 |
| design_20 | -3.7478 | 4 |
| design_21 | -3.5645 | 4 |
| design_22 | -2.4194 | 4 |
| design_23 | -3.1563 | 4 |

|           |         |   |
|-----------|---------|---|
| design_24 | -2.2446 | 4 |
| design_25 | -2.544  | 4 |
| design_26 | -2.0714 | 3 |
| design_27 | -1.8728 | 4 |
| design_28 | -0.9618 | 4 |
| design_29 | -1.5205 | 4 |
| design_30 | -3.9114 | 4 |
| design_31 | -2.217  | 4 |
| design_32 | -1.9363 | 4 |
| design_33 | -3.166  | 4 |
| design_34 | -3.4434 | 3 |
| design_35 | -4.2443 | 2 |
| design_36 | -3.628  | 4 |
| design_37 | -2.9272 | 4 |
| design_38 | -3.0197 | 4 |
| design_39 | -2.493  | 3 |
| design_40 | -2.289  | 4 |
| design_41 | -3.1069 | 4 |
| design_42 | -3.0584 | 4 |
| design_43 | -3.4382 | 4 |
| design_44 | -3.8292 | 4 |
| design_45 | -4.2311 | 2 |
| design_46 | -2.8551 | 4 |
| design_47 | -2.7076 | 4 |
| design_48 | -3.4101 | 4 |
| design_49 | -3.0123 | 4 |
| design_50 | -2.568  | 4 |
| design_51 | -1.9426 | 4 |
| design_52 | -4.6407 | 2 |
| design_53 | -4.3904 | 2 |
| design_54 | -2.944  | 4 |
| design_55 | -2.6457 | 4 |
| design_56 | -2.8902 | 4 |
| design_57 | -3.6813 | 4 |
| design_58 | -3.7299 | 4 |
| design_59 | -3.5145 | 4 |
| design_60 | -2.2263 | 4 |
| design_61 | -3.567  | 4 |
| design_62 | -2.3705 | 4 |
| design_63 | -3.1996 | 4 |
| design_64 | -2.1455 | 4 |
| design_65 | -3.3877 | 3 |
| design_66 | -3.6497 | 4 |
| design_67 | -2.5025 | 4 |
| design_68 | -1.8158 | 4 |
| design_69 | -3.5581 | 4 |



|           |         |   |
|-----------|---------|---|
| design_70 | -2.1632 | 4 |
| design_71 | -3.6069 | 4 |
| design_72 | -3.5224 | 4 |
| design_73 | -2.195  | 4 |
| design_74 | -2.7727 | 4 |
| design_75 | -2.1319 | 4 |
| design_76 | -3.5511 | 4 |
| design_77 | -2.9556 | 4 |
| design_78 | -2.2757 | 4 |
| design_79 | -2.397  | 4 |
| design_80 | -2.6819 | 4 |
| design_81 | -3.6407 | 4 |
| design_82 | -3.1818 | 4 |
| design_83 | -3.6133 | 4 |
| design_84 | -1.7588 | 4 |
| design_85 | -3.7949 | 4 |
| design_86 | -2.6104 | 4 |
| design_87 | -2.4788 | 4 |

\*\*\*\*\*

Group 28s -

# CAPRI T45 predictions - Bonvin group, Utrecht University, the Netherlands

# Raw scores are given after the calculating of the pKd for each complex

#

| #Complex  | Raw score | normalized score |
|-----------|-----------|------------------|
| design_1  | 4.8 4     |                  |
| design_2  | 4.0 4     |                  |
| design_3  | 6.4 3     |                  |
| design_4  | 2.3 5     |                  |
| design_5  | 2.9 5     |                  |
| design_6  | 5.0 3     |                  |
| design_7  | 4.2 4     |                  |
| design_8  | 4.8 4     |                  |
| design_9  | 3.3 4     |                  |
| design_10 | 1.7 5     |                  |
| design_11 | 1.4 5     |                  |
| design_12 | 3.6 4     |                  |
| design_13 | 4.2 4     |                  |
| design_14 | 3.6 4     |                  |
| design_15 | 4.7 4     |                  |
| design_16 | 4.7 4     |                  |
| design_17 | 5.1 3     |                  |
| design_18 | 2.2 5     |                  |
| design_19 | 5.9 3     |                  |
| design_20 | 7.1 2     |                  |
| design_21 | 4.9 4     |                  |
| design_22 | 6.0 3     |                  |

|           |     |   |
|-----------|-----|---|
| design_23 | 4.0 | 4 |
| design_24 | 5.6 | 3 |
| design_25 | 3.4 | 4 |
| design_26 | 4.9 | 4 |
| design_27 | 4.9 | 4 |
| design_28 | 2.2 | 5 |
| design_29 | 4.1 | 4 |
| design_30 | 7.0 | 2 |
| design_31 | 4.1 | 4 |
| design_32 | 2.6 | 5 |
| design_33 | 4.9 | 4 |
| design_34 | 5.3 | 3 |
| design_35 | 5.4 | 3 |
| design_36 | 4.9 | 4 |
| design_37 | 5.0 | 3 |
| design_38 | 6.7 | 3 |
| design_39 | 1.1 | 5 |
| design_40 | 4.3 | 4 |
| design_41 | 3.2 | 4 |
| design_42 | 3.4 | 4 |
| design_43 | 3.5 | 4 |
| design_44 | 5.2 | 3 |
| design_45 | 4.5 | 4 |
| design_46 | 2.6 | 5 |
| design_47 | 3.8 | 4 |
| design_48 | 2.7 | 5 |
| design_49 | 2.7 | 5 |
| design_50 | 3.9 | 4 |
| design_51 | 5.3 | 3 |
| design_52 | 4.3 | 4 |
| design_53 | 5.7 | 3 |
| design_54 | 5.6 | 3 |
| design_55 | 2.3 | 5 |
| design_56 | 3.6 | 4 |
| design_57 | 8.8 | 2 |
| design_58 | 3.4 | 4 |
| design_59 | 4.6 | 4 |
| design_60 | 3.8 | 4 |
| design_61 | 5.3 | 3 |
| design_62 | 4.7 | 4 |
| design_63 | 6.4 | 3 |
| design_64 | 1.6 | 5 |
| design_65 | 1.9 | 5 |
| design_66 | 2.5 | 5 |
| design_67 | 5.2 | 3 |
| design_68 | 4.1 | 4 |

|           |      |   |
|-----------|------|---|
| design_69 | 3.1  | 4 |
| design_70 | 2.5  | 5 |
| design_71 | 4.0  | 4 |
| design_72 | 4.4  | 4 |
| design_73 | 2.7  | 5 |
| design_74 | 2.5  | 5 |
| design_75 | 3.7  | 4 |
| design_76 | 5.3  | 3 |
| design_77 | 4.1  | 4 |
| design_78 | 0.4  | 5 |
| design_79 | 3.8  | 4 |
| design_80 | 3.3  | 4 |
| design_81 | 4.8  | 4 |
| design_82 | 5.5  | 3 |
| design_83 | 6.1  | 3 |
| design_84 | 6.0  | 3 |
| design_85 | 3.7  | 4 |
| design_86 | 3.4  | 4 |
| design_87 | 5.0  | 3 |
| 1A2K      | 6.4  | 3 |
| 1ACB      | 8.1  | 2 |
| 1AHW      | 8.6  | 2 |
| 1AK4      | 3.7  | 4 |
| 1AKJ      | 3.2  | 4 |
| 1AVX      | 11.7 | 1 |
| 1AY7      | 7.9  | 2 |
| 1AZS      | 7.8  | 2 |
| 1B6C      | 5.8  | 3 |
| 1BGX      | 16.2 | 1 |
| 1BJ1      | 11.7 | 1 |
| 1BKD      | 8.8  | 2 |
| 1BUH      | 4.0  | 4 |
| 1BVK      | 4.2  | 4 |
| 1BVN      | 8.4  | 2 |
| 1CGI      | 10.8 | 1 |
| 1D6R      | 10.2 | 1 |
| 1DE4      | 7.8  | 2 |
| 1DFJ      | 8.1  | 2 |
| 1DQJ      | 6.8  | 3 |
| 1E4K      | 3.2  | 4 |
| 1E6J      | 4.4  | 4 |
| 1E96-     | 4.7  | 4 |
| 1EAW      | 10.8 | 1 |
| 1EER      | 15.6 | 1 |
| 1EFN      | 5.0  | 3 |
| 1EWY      | 3.8  | 4 |

|      |      |   |
|------|------|---|
| 1EZU | 11.1 | 1 |
| 1F34 | 11.3 | 1 |
| 1F51 | 6.1  | 3 |
| 1FAK | 5.7  | 3 |
| 1FC2 | 2.8  | 5 |
| 1FQ1 | 3.5  | 4 |
| 1FQJ | 1.1  | 5 |
| 1FSK | 11.5 | 1 |
| 1GCQ | 5.0  | 3 |
| 1GHQ | 1.7  | 5 |
| 1GLA | 3.9  | 4 |
| 1GP2 | 8.1  | 2 |
| 1GPW | 9.0  | 1 |
| 1GRN | 6.4  | 3 |
| 1H1V | 1.3  | 5 |
| 1HE1 | 4.9  | 4 |
| 1HE8 | 3.3  | 4 |
| 1HIA | 9.9  | 1 |
| 1I2M | 15.1 | 1 |
| 1I4D | 5.9  | 3 |
| 1I9R | 7.3  | 2 |
| 1IB1 | 3.4  | 4 |
| 1IBR | 13.3 | 1 |
| 1IJK | 9.5  | 1 |
| 1IQD | 11.5 | 1 |
| 1IRA | 7.1  | 2 |
| 1J2J | 3.5  | 4 |
| 1JMO | 15.3 | 1 |
| 1JPS | 10.6 | 1 |
| 1K4C | 10.8 | 1 |
| 1K5D | 12.1 | 1 |
| 1K74 | 7.5  | 2 |
| 1KAC | 3.5  | 4 |
| 1KKL | 4.5  | 4 |
| 1KLU | 5.7  | 3 |
| 1KTZ | 2.7  | 5 |
| 1KXP | 10.6 | 1 |
| 1KXQ | 7.2  | 2 |
| 1M10 | 7.8  | 2 |
| 1MAH | 8.1  | 2 |
| 1ML0 | 10.0 | 1 |
| 1MLC | 7.7  | 2 |
| 1N2C | 18.3 | 1 |
| 1N80 | 7.1  | 2 |
| 1NCA | 7.5  | 2 |
| 1NSN | 4.4  | 4 |

|      |      |   |
|------|------|---|
| 1NW9 | 8.2  | 2 |
| 1OPH | 12.5 | 1 |
| 1PPE | 10.4 | 1 |
| 1PVX | 9.3  | 1 |
| 1QA9 | 5.0  | 3 |
| 1QFW | 4.2  | 4 |
| 1R0R | 8.4  | 2 |
| 1R8S | 9.2  | 1 |
| 1RLB | 5.0  | 3 |
| 1S1Q | 4.5  | 4 |
| 1SSB | 2.2  | 5 |
| 1T6B | 5.7  | 3 |
| 1UDI | 5.0  | 3 |
| 1VFB | 5.6  | 3 |
| 1WEJ | 7.6  | 2 |
| 1WQ1 | 5.5  | 3 |
| 1XD3 | 9.9  | 1 |
| 1XQS | 15.0 | 1 |
| 1Y64 | 4.1  | 4 |
| 1YVB | 7.4  | 2 |
| 1Z0K | 6.3  | 3 |
| 1Z5Y | 5.8  | 3 |
| 1ZHI | 5.1  | 3 |
| 2AJF | 4.4  | 4 |
| 2B42 | 9.1  | 1 |
| 2C0L | 6.8  | 3 |
| 2CFH | 7.5  | 2 |
| 2FD6 | 5.9  | 3 |
| 2H7V | 4.5  | 4 |
| 2HLE | 11.1 | 1 |
| 2HMI | 3.9  | 4 |
| 2HQS | 5.1  | 3 |
| 2HRK | 4.9  | 4 |
| 2I25 | 7.8  | 2 |
| 2JEL | 5.4  | 3 |
| 2MTA | 1.8  | 5 |
| 2NZ8 | 6.9  | 3 |
| 2O8V | 7.0  | 2 |
| 2O0B | 3.3  | 4 |
| 2OT3 | 9.9  | 1 |
| 2PCC | 4.1  | 4 |
| 2QFW | 5.2  | 3 |
| 2SIC | 7.1  | 2 |
| 2SNI | 7.6  | 2 |
| 2UUY | 10.1 | 1 |
| 2VIS | 5.8  | 3 |

7CEI 8.1 2

\*\*\*\*\*

Group 29s -

Has document file in email from weiyi.zhang2008@gmail.com that explains method.

|           | Raw score | normalized score |
|-----------|-----------|------------------|
| design_1  | -60.34    | 4                |
| design_2  | -43.15    | 4                |
| design_3  | -74.56    | 3                |
| design_4  | -51.43    | 4                |
| design_5  | -58.33    | 4                |
| design_6  | -71.32    | 3                |
| design_7  | -73.48    | 3                |
| design_8  | -74.66    | 3                |
| design_9  | -48.92    | 4                |
| design_10 | -59.72    | 4                |
| design_11 | -40.34    | 4                |
| design_12 | -71.44    | 3                |
| design_13 | -52.62    | 4                |
| design_14 | -58.11    | 4                |
| design_15 | -59.27    | 4                |
| design_16 | -84.48    | 2                |
| design_17 | -56.81    | 4                |
| design_18 | -63.14    | 4                |
| design_19 | -78.38    | 3                |
| design_20 | -101.57   | 1                |
| design_21 | -56.8     | 4                |
| design_22 | -64.75    | 4                |
| design_23 | -60.97    | 4                |
| design_24 | -76.73    | 3                |
| design_25 | -50.51    | 4                |
| design_26 | -62.75    | 4                |
| design_27 | -56.14    | 4                |
| design_28 | -61.99    | 4                |
| design_29 | -78.63    | 3                |
| design_30 | -74.24    | 3                |
| design_31 | -43.42    | 4                |
| design_32 | -47.27    | 4                |
| design_33 | -78.1     | 3                |
| design_34 | -83.95    | 2                |
| design_35 | -80.87    | 2                |
| design_36 | -61.95    | 4                |
| design_37 | -74       | 3                |
| design_38 | -91.85    | 1                |
| design_39 | -43.29    | 4                |

|           |        |   |
|-----------|--------|---|
| design_40 | -69.67 | 3 |
| design_41 | -63.19 | 4 |
| design_42 | -61.78 | 4 |
| design_43 | -59.07 | 4 |
| design_44 | -77.91 | 3 |
| design_45 | -71.68 | 3 |
| design_46 | -50.36 | 4 |
| design_47 | -53.58 | 4 |
| design_48 | -57.85 | 4 |
| design_49 | -55.41 | 4 |
| design_50 | -50.04 | 4 |
| design_51 | -65.73 | 4 |
| design_52 | -71.85 | 3 |
| design_53 | -75.55 | 3 |
| design_54 | -52.47 | 4 |
| design_55 | -64.78 | 4 |
| design_56 | -50.13 | 4 |
| design_57 | -84.68 | 2 |
| design_58 | -75.73 | 3 |
| design_59 | -67.03 | 4 |
| design_60 | -39.89 | 4 |
| design_61 | -67.56 | 4 |
| design_62 | -77.99 | 3 |
| design_63 | -67.27 | 4 |
| design_64 | -43.95 | 4 |
| design_65 | -62.2  | 4 |
| design_66 | -72.58 | 3 |
| design_67 | -47.77 | 4 |
| design_68 | -60.28 | 4 |
| design_69 | -74.42 | 3 |
| design_70 | -54.99 | 4 |
| design_71 | -73.77 | 3 |
| design_72 | -73.68 | 3 |
| design_73 | -55.05 | 4 |
| design_74 | -37.22 | 4 |
| design_75 | -62.22 | 4 |
| design_76 | -84.95 | 2 |
| design_77 | -86.51 | 2 |
| design_78 | -47.34 | 4 |
| design_79 | -46.36 | 4 |
| design_80 | -47.17 | 4 |
| design_81 | -67.44 | 4 |
| design_82 | -81.16 | 2 |
| design_83 | -92.62 | 1 |
| design_84 | -75.13 | 3 |
| design_85 | -78.11 | 3 |

|             |         |   |
|-------------|---------|---|
| design_86   | -40.81  | 4 |
| design_87   | -56.67  | 4 |
| ZDock2_1A2K | -97.38  | 1 |
| ZDock2_1ACB | -79.77  | 2 |
| ZDock2_1AHW | -87.55  | 2 |
| ZDock2_1AK4 | -47.67  | 4 |
| ZDock2_1AKJ | -91.23  | 1 |
| ZDock2_1AVX | -96.55  | 1 |
| ZDock2_1AY7 | -68.8   | 4 |
| ZDock2_1B6C | -92.36  | 1 |
| ZDock2_1BGX | -218.2  | 1 |
| ZDock2_1BJ1 | -103.05 | 1 |
| ZDock2_1BUH | -61.11  | 4 |
| ZDock2_1BVK | -49.89  | 4 |
| ZDock2_1BVN | -116.59 | 1 |
| ZDock2_1CGI | -111.17 | 1 |
| ZDock2_1D6R | -71.6   | 3 |
| ZDock2_1DE4 | -80.15  | 2 |
| ZDock2_1DFJ | -110.79 | 1 |
| ZDock2_1DQJ | -72.98  | 3 |
| ZDock2_1E6J | -69.27  | 3 |
| ZDock2_1E96 | -69.73  | 3 |
| ZDock2_1EAW | -105.89 | 1 |
| ZDock2_1EER | -197.6  | 1 |
| ZDock2_1EWY | -65.43  | 4 |
| ZDock2_1EZU | -123.63 | 1 |
| ZDock2_1F34 | -149.97 | 1 |
| ZDock2_1F51 | -89.89  | 1 |
| ZDock2_1FAK | -124.37 | 1 |
| ZDock2_1FC2 | -47.97  | 4 |
| ZDock2_1FQ1 | -67.55  | 4 |
| ZDock2_1FQJ | -80.98  | 2 |
| ZDock2_1FSK | -92     | 1 |
| ZDock2_1GCQ | -63.79  | 4 |
| ZDock2_1GHQ | -24.7   | 4 |
| ZDock2_1GP2 | -124.03 | 1 |
| ZDock2_1GRN | -104.81 | 1 |
| ZDock2_1H1V | -61.64  | 4 |
| ZDock2_1HE1 | -105.98 | 1 |
| ZDock2_1HE8 | -70.84  | 3 |
| ZDock2_1HIA | -94.66  | 1 |
| ZDock2_1I2M | -159.52 | 1 |
| ZDock2_1I4D | -60.17  | 4 |
| ZDock2_1I9R | -64.4   | 4 |
| ZDock2_1IB1 | -130.92 | 1 |



|             |         |   |
|-------------|---------|---|
| ZDock2_1IBR | -188.07 | 1 |
| ZDock2_1IJK | -103.89 | 1 |
| ZDock2_1IQD | -141.7  | 1 |
| ZDock2_1JPS | -101.07 | 1 |
| ZDock2_1K4C | -110.97 | 1 |
| ZDock2_1K5D | -155.41 | 1 |
| ZDock2_1KAC | -64.31  | 4 |
| ZDock2_1KKL | -71.95  | 3 |
| ZDock2_1KLU | -65.99  | 4 |
| ZDock2_1KTZ | -62.82  | 4 |
| ZDock2_1KXP | -171.56 | 1 |
| ZDock2_1KXQ | -103.02 | 1 |
| ZDock2_1M10 | -108.51 | 1 |
| ZDock2_1MAH | -106.77 | 1 |
| ZDock2_1ML0 | -133.66 | 1 |
| ZDock2_1MLC | -69.22  | 3 |
| ZDock2_1N2C | -193.23 | 1 |
| ZDock2_1NCA | -93.69  | 1 |
| ZDock2_1NSN | -52.97  | 4 |
| ZDock2_1PPE | -103.97 | 1 |
| ZDock2_1QA9 | -65.98  | 4 |
| ZDock2_1QFW | -73.08  | 3 |
| ZDock2_1RLB | -58.07  | 4 |
| ZDock2_1SBB | -44.95  | 4 |
| ZDock2_1UDI | -100.6  | 1 |
| ZDock2_1VFB | -57.22  | 4 |
| ZDock2_1WEJ | -65     | 4 |
| ZDock2_1WQ1 | -124.4  | 1 |
| ZDock2_2HMI | -30.36  | 4 |
| ZDock2_2JEL | -73.51  | 3 |
| ZDock2_2MTA | -59.69  | 4 |
| ZDock2_2PCC | -58.75  | 4 |
| ZDock2_2QFW | -54.11  | 4 |
| ZDock2_2SIC | -79.94  | 2 |
| ZDock2_2SNI | -93.93  | 1 |
| ZDock2_2VIS | -60.6   | 4 |
| ZDock2_7CEI | -112.73 | 1 |
|             |         |   |
| ZDock3_1AZS | -95.61  | 1 |
| ZDock3_1BKD | -139.26 | 1 |
| ZDock3_1E4K | -66.74  | 4 |
| ZDock3_1EFN | -74.43  | 3 |
| ZDock3_1GLA | -76.82  | 3 |
| ZDock3_1GPW | -112.97 | 1 |
| ZDock3_1IRA | -134.35 | 1 |
| ZDock3_1J2J | -61.23  | 4 |

|             |         |   |
|-------------|---------|---|
| ZDock3_1JM0 | -186.68 | 1 |
| ZDock3_1K74 | -83.26  | 2 |
| ZDock3_1N80 | -104.02 | 1 |
| ZDock3_1NW9 | -114.51 | 1 |
| ZDock3_10PH | -84.1   | 2 |
| ZDock3_1PXV | -120.76 | 1 |
| ZDock3_1R0R | -71.54  | 3 |
| ZDock3_1R8S | -154.5  | 1 |
| ZDock3_1S1Q | -46.92  | 4 |
| ZDock3_1T6B | -63.06  | 4 |
| ZDock3_1XD3 | -129.72 | 1 |
| ZDock3_1XQS | -152.32 | 1 |
| ZDock3_1Y64 | -84.08  | 2 |
| ZDock3_1YVB | -65.99  | 4 |
| ZDock3_1Z0K | -94.51  | 1 |
| ZDock3_1Z5Y | -70.28  | 3 |
| ZDock3_1ZHI | -68.53  | 4 |
| ZDock3_2AJF | -72.52  | 3 |
| ZDock3_2B42 | -113.92 | 1 |
| ZDock3_2C0L | -107.15 | 1 |
| ZDock3_2CFH | -138.32 | 1 |
| ZDock3_2FD6 | -53.75  | 4 |
| ZDock3_2H7V | -85.48  | 2 |
| ZDock3_2HLE | -138.94 | 1 |
| ZDock3_2HQS | -110.74 | 1 |
| ZDock3_2HRK | -66.21  | 4 |
| ZDock3_2I25 | -89.76  | 1 |
| ZDock3_2NZ8 | -121.82 | 1 |
| ZDock3_208V | -84.38  | 2 |
| ZDock3_200B | -43.16  | 4 |
| ZDock3_20T3 | -135.55 | 1 |
| ZDock3_2UUY | -78.77  | 3 |

Raw scores are given in kcal/mole in this example.

\*\*\*\*\*

Group 30s-

Raw scores are given in units of Angstrom<sup>2</sup> per residue

Index for normalized score : 1 - binds; 4 - does not bind; 5 - uncertain

| Complex   | Raw score | Normalized score |
|-----------|-----------|------------------|
| design_01 | 1.57      | 4                |
| design_02 | 0.94      | 4                |
| design_03 | 1.76      | 4                |
| design_04 | 1.57      | 4                |
| design_05 | 1.54      | 4                |
| design_06 | 2.69      | 1                |

|           |      |   |
|-----------|------|---|
| design_07 | 1.46 | 4 |
| design_08 | 2.89 | 1 |
| design_09 | 1.36 | 4 |
| design_10 | 1.92 | 4 |
| design_11 | 1.68 | 4 |
| design_12 | 1.93 | 4 |
| design_13 | 1.66 | 4 |
| design_14 | 1.77 | 4 |
| design_15 | 2.46 | 5 |
| design_16 | 0.91 | 4 |
| design_17 | 0.83 | 4 |
| design_18 | 1.29 | 4 |
| design_19 | 2.06 | 5 |
| design_20 | 3.19 | 1 |
| design_21 | 1.45 | 4 |
| design_22 | 2.32 | 5 |
| design_23 | 1.97 | 4 |
| design_24 | 3.49 | 1 |
| design_25 | 1.01 | 4 |
| design_26 | 1.51 | 4 |
| design_27 | 1.42 | 4 |
| design_28 | 2.95 | 1 |
| design_29 | 2.41 | 5 |
| design_30 | 2.20 | 5 |
| design_31 | 1.00 | 4 |
| design_32 | 1.07 | 4 |
| design_33 | 3.22 | 1 |
| design_34 | 2.20 | 5 |
| design_35 | 1.98 | 4 |
| design_36 | 0.91 | 4 |
| design_37 | 2.67 | 1 |
| design_38 | 3.21 | 1 |
| design_39 | 1.20 | 4 |
| design_40 | 0.86 | 4 |
| design_41 | 0.93 | 4 |
| design_42 | 1.62 | 4 |
| design_43 | 1.60 | 4 |
| design_44 | 1.93 | 4 |
| design_45 | 2.28 | 5 |
| design_46 | 1.18 | 4 |
| design_47 | 1.51 | 4 |
| design_48 | 1.94 | 4 |
| design_49 | 2.31 | 5 |
| design_50 | 1.53 | 4 |
| design_51 | 2.14 | 5 |
| design_52 | 1.30 | 4 |

|           |      |   |
|-----------|------|---|
| design_53 | 1.20 | 4 |
| design_54 | 1.91 | 4 |
| design_55 | 2.99 | 1 |
| design_56 | 1.37 | 4 |
| design_57 | 2.34 | 5 |
| design_58 | 1.09 | 4 |
| design_59 | 2.26 | 5 |
| design_60 | 1.60 | 4 |
| design_61 | 1.83 | 4 |
| design_62 | 4.45 | 1 |
| design_63 | 1.72 | 4 |
| design_64 | 1.29 | 4 |
| design_65 | 1.58 | 4 |
| design_66 | 1.82 | 4 |
| design_67 | 1.77 | 4 |
| design_68 | 2.66 | 1 |
| design_69 | 1.83 | 4 |
| design_70 | 1.33 | 4 |
| design_71 | 3.56 | 1 |
| design_72 | 2.29 | 5 |
| design_73 | 1.15 | 4 |
| design_74 | 1.18 | 4 |
| design_75 | 2.52 | 1 |
| design_76 | 1.25 | 4 |
| design_77 | 2.24 | 5 |
| design_78 | 1.41 | 4 |
| design_79 | 1.57 | 4 |
| design_80 | 1.39 | 4 |
| design_81 | 1.55 | 4 |
| design_82 | 2.77 | 1 |
| design_83 | 4.60 | 1 |
| design_84 | 2.19 | 5 |
| design_85 | 1.63 | 4 |
| design_86 | 0.80 | 4 |
| design_87 | 1.40 | 4 |
| 1ACB      | 2.58 | 1 |
| 1AK4      | 1.54 | 4 |
| 1AVX      | 2.15 | 5 |
| 1AY7      | 3.38 | 1 |
| 1B6C      | 2.09 | 5 |
| 1BKD      | 2.53 | 1 |
| 1BUH      | 1.89 | 4 |
| 1BVN      | 1.92 | 4 |
| 1CGI      | 3.44 | 1 |
| 1D6R      | 2.33 | 5 |
| 1DFJ      | 2.11 | 5 |

|      |      |   |
|------|------|---|
| 1E96 | 1.62 | 4 |
| 1EAW | 3.06 | 1 |
| 1EFN | 3.91 | 1 |
| 1EWY | 1.81 | 4 |
| 1F34 | 3.27 | 1 |
| 1FC2 | 2.71 | 1 |
| 1FQ1 | 1.80 | 4 |
| 1FQJ | 2.04 | 5 |
| 1GCQ | 4.94 | 1 |
| 1GHQ | 0.77 | 4 |
| 1GLA | 1.04 | 4 |
| 1GPW | 2.35 | 5 |
| 1GRN | 2.89 | 1 |
| 1H1V | 1.44 | 4 |
| 1HE1 | 3.28 | 1 |
| 1HE8 | 0.80 | 4 |
| 1I2M | 2.56 | 1 |
| 1IBR | 2.75 | 1 |
| 1IRA | 3.48 | 1 |
| 1J2J | 2.80 | 1 |
| 1KAC | 2.28 | 5 |
| 1KKL | 1.37 | 4 |
| 1KTZ | 2.54 | 1 |
| 1KXP | 2.15 | 5 |
| 1KXQ | 1.67 | 4 |
| 1M10 | 2.18 | 5 |
| 1MAH | 1.64 | 4 |
| 1N80 | 2.48 | 5 |
| 1NW9 | 3.08 | 1 |
| 1OPH | 1.08 | 4 |
| 1PPE | 3.24 | 1 |
| 1PXV | 3.98 | 1 |
| 1QA9 | 2.97 | 1 |
| 1R0R | 2.11 | 5 |
| 1R8S | 3.93 | 1 |
| 1RLB | 1.07 | 4 |
| 1S1Q | 2.94 | 1 |
| 1SBB | 1.31 | 4 |
| 1T6B | 1.12 | 4 |
| 1UDI | 3.19 | 1 |
| 1WQ1 | 3.02 | 1 |
| 1XD3 | 3.61 | 1 |
| 1XQS | 2.70 | 1 |
| 1Y64 | 1.48 | 4 |
| 1YVB | 2.23 | 5 |
| 1Z0K | 3.97 | 1 |

|      |      |   |
|------|------|---|
| 1Z5Y | 2.55 | 1 |
| 1ZHI | 1.91 | 4 |
| 2AJF | 1.10 | 4 |
| 2B42 | 2.31 | 5 |
| 2C0L | 2.23 | 5 |
| 2CFH | 3.82 | 1 |
| 2H7V | 1.67 | 4 |
| 2HLE | 3.27 | 1 |
| 2HQS | 2.16 | 5 |
| 2HRK | 2.58 | 1 |
| 2I25 | 2.91 | 1 |
| 2NZ8 | 2.73 | 1 |
| 2O8V | 2.32 | 5 |
| 2O0B | 3.31 | 1 |
| 2OT3 | 2.76 | 1 |
| 2PCC | 1.36 | 4 |
| 2SIC | 2.08 | 5 |
| 2SNI | 2.43 | 5 |
| 2UUY | 2.44 | 5 |
| 7CEI | 3.18 | 1 |

\*\*\*\*\*

Group 31s-

|           | Raw Score | normalized score |
|-----------|-----------|------------------|
| design_1  | 0.230     | 4                |
| design_2  | 2.850     | 2                |
| design_3  | 1.074     | 4                |
| design_4  | 1.517     | 3                |
| design_5  | 3.037     | 2                |
| design_6  | -0.822    | 4                |
| design_7  | 1.695     | 3                |
| design_8  | 1.177     | 4                |
| design_9  | 0.628     | 4                |
| design_10 | 3.168     | 2                |
| design_11 | 0.509     | 4                |
| design_12 | 0.021     | 4                |
| design_13 | 1.339     | 4                |
| design_14 | 1.139     | 4                |
| design_15 | 1.755     | 3                |
| design_16 | 0.951     | 4                |
| design_17 | 0.126     | 4                |
| design_18 | -0.309    | 4                |
| design_19 | 1.173     | 4                |
| design_20 | 3.184     | 2                |
| design_21 | 2.783     | 2                |
| design_22 | 1.302     | 4                |

|           |        |   |
|-----------|--------|---|
| design_23 | 3.542  | 2 |
| design_24 | 2.838  | 2 |
| design_25 | 1.012  | 4 |
| design_26 | 1.550  | 3 |
| design_27 | 4.166  | 1 |
| design_28 | 3.313  | 2 |
| design_29 | 6.651  | 1 |
| design_30 | 0.592  | 4 |
| design_31 | 0.538  | 4 |
| design_32 | 0.477  | 4 |
| design_33 | 0.390  | 4 |
| design_34 | -0.272 | 4 |
| design_35 | 6.703  | 1 |
| design_36 | -0.396 | 4 |
| design_37 | 3.481  | 2 |
| design_38 | 1.953  | 3 |
| design_39 | 6.779  | 1 |
| design_40 | 0.984  | 4 |
| design_41 | -0.593 | 4 |
| design_42 | -1.182 | 4 |
| design_43 | 0.047  | 4 |
| design_44 | -1.259 | 4 |
| design_45 | 1.413  | 4 |
| design_46 | 1.538  | 3 |
| design_47 | 0.225  | 4 |
| design_48 | 2.105  | 3 |
| design_49 | 0.925  | 4 |
| design_50 | -1.213 | 4 |
| design_51 | 6.506  | 1 |
| design_52 | 0.108  | 4 |
| design_53 | 0.958  | 4 |
| design_54 | 1.590  | 3 |
| design_55 | 6.054  | 1 |
| design_56 | 3.023  | 2 |
| design_57 | 2.416  | 3 |
| design_58 | 0.557  | 4 |
| design_59 | 6.096  | 1 |
| design_60 | 1.969  | 3 |
| design_61 | 1.804  | 3 |
| design_62 | 1.483  | 4 |
| design_63 | 0.581  | 4 |
| design_64 | -0.614 | 4 |
| design_65 | 6.112  | 1 |
| design_66 | 2.921  | 2 |
| design_67 | 2.045  | 3 |
| design_68 | 1.876  | 3 |

|           |        |   |
|-----------|--------|---|
| design_69 | -0.351 | 4 |
| design_70 | -0.716 | 4 |
| design_71 | 1.505  | 3 |
| design_72 | 1.844  | 3 |
| design_73 | 3.584  | 2 |
| design_74 | -0.859 | 4 |
| design_75 | 3.201  | 2 |
| design_76 | 0.725  | 4 |
| design_77 | 0.352  | 4 |
| design_78 | 0.170  | 4 |
| design_79 | 0.446  | 4 |
| design_80 | 1.397  | 4 |
| design_81 | 0.640  | 4 |
| design_82 | 0.917  | 4 |
| design_83 | 9.034  | 1 |
| design_84 | 1.618  | 3 |
| design_85 | -0.159 | 4 |
| design_86 | -1.345 | 4 |
| design_87 | 2.064  | 3 |
| 1A2K      | 1.464  | 4 |
| 1ACB      | 5.057  | 1 |
| 1AHW      | 4.171  | 1 |
| 1AK4      | 2.474  | 3 |
| 1AKJ      | 1.908  | 3 |
| 1AVX      | 1.962  | 3 |
| 1AY7      | 4.704  | 1 |
| 1AZS      | 4.450  | 1 |
| 1B6C      | 6.832  | 1 |
| 1BGX      | 14.433 | 1 |
| 1BJ1      | 1.098  | 4 |
| 1BKD      | 9.914  | 1 |
| 1BUH      | 1.445  | 4 |
| 1BVK      | 6.242  | 1 |
| 1BVN      | 7.157  | 1 |
| 1CGI      | 8.839  | 1 |
| 1D6R      | 2.568  | 2 |
| 1DE4      | 6.141  | 1 |
| 1DFJ      | 1.341  | 4 |
| 1DQJ      | 7.902  | 1 |
| 1E4K      | 2.221  | 3 |
| 1E6J      | 3.578  | 2 |
| 1E96      | 4.393  | 1 |
| 1EAW      | 7.492  | 1 |
| 1EER      | 9.040  | 1 |
| 1EFN      | 3.175  | 2 |
| 1EWY      | -0.156 | 4 |



|      |        |   |
|------|--------|---|
| 1EZU | 8.157  | 1 |
| 1F34 | 9.752  | 1 |
| 1F51 | 7.557  | 1 |
| 1FAK | 7.265  | 1 |
| 1FC2 | 6.068  | 1 |
| 1FQ1 | 2.595  | 2 |
| 1FQJ | -0.122 | 4 |
| 1FSK | 3.359  | 2 |
| 1GCQ | 5.891  | 1 |
| 1GHQ | 3.527  | 2 |
| 1GLA | 0.491  | 4 |
| 1GP2 | 4.191  | 1 |
| 1GPW | 6.790  | 1 |
| 1GRN | 6.180  | 1 |
| 1H1V | 0.184  | 4 |
| 1HE1 | 7.189  | 1 |
| 1HE8 | 3.712  | 2 |
| 1HIA | 6.705  | 1 |
| 1I2M | 9.519  | 1 |
| 1I4D | 2.430  | 3 |
| 1I9R | 6.006  | 1 |
| 1IB1 | 4.444  | 1 |
| 1IBR | 8.081  | 1 |
| 1IJK | 1.871  | 3 |
| 1IQD | 6.479  | 1 |
| 1IRA | 10.078 | 1 |
| 1J2J | 0.177  | 4 |
| 1JMO | 11.478 | 1 |
| 1JPS | 3.231  | 2 |
| 1K4C | 4.925  | 1 |
| 1K5D | 9.717  | 1 |
| 1K74 | 6.608  | 1 |
| 1KAC | 6.621  | 1 |
| 1KKL | -0.689 | 4 |
| 1KLU | 4.209  | 1 |
| 1KTZ | 0.824  | 4 |
| 1KXP | 9.238  | 1 |
| 1KXQ | 4.134  | 1 |
| 1M10 | 7.108  | 1 |
| 1MAH | 5.602  | 1 |
| 1ML0 | 6.907  | 1 |
| 1MLC | 0.234  | 4 |
| 1N2C | 9.521  | 1 |
| 1N80 | 6.779  | 1 |
| 1NCA | 5.878  | 1 |
| 1NSN | 0.404  | 4 |

|      |        |   |
|------|--------|---|
| 1NW9 | 7.540  | 1 |
| 1OPH | -0.271 | 4 |
| 1PPE | 7.417  | 1 |
| 1PXV | 8.093  | 1 |
| 1QA9 | 0.201  | 4 |
| 1QFW | 1.362  | 4 |
| 1R0R | 6.523  | 1 |
| 1R8S | 10.229 | 1 |
| 1RLB | 7.716  | 1 |
| 1S1Q | 1.968  | 3 |
| 1SBB | 1.356  | 4 |
| 1T6B | 1.652  | 3 |
| 1UDI | 6.299  | 1 |
| 1VFB | 1.799  | 3 |
| 1WEJ | 6.052  | 1 |
| 1WQ1 | 8.011  | 1 |
| 1XD3 | 9.721  | 1 |
| 1XQS | 7.490  | 1 |
| 1Y64 | 7.582  | 1 |
| 1YVB | 1.452  | 4 |
| 1Z0K | 5.129  | 1 |
| 1Z5Y | 2.383  | 3 |
| 1ZHI | 0.390  | 4 |
| 2AJF | 1.863  | 3 |
| 2B42 | 6.712  | 1 |
| 2C0L | 7.290  | 1 |
| 2CFH | 9.394  | 1 |
| 2FD6 | -0.478 | 4 |
| 2H7V | 7.288  | 1 |
| 2HLE | 7.748  | 1 |
| 2HMI | -0.654 | 4 |
| 2HQS | 0.770  | 4 |
| 2HRK | 2.469  | 3 |
| 2I25 | 6.476  | 1 |
| 2JEL | 0.483  | 4 |
| 2MTA | 1.232  | 4 |
| 2NZ8 | 3.837  | 2 |
| 2O8V | 5.683  | 1 |
| 2O0B | 0.452  | 4 |
| 2OT3 | 9.097  | 1 |
| 2PCC | 0.947  | 4 |
| 2QFW | 2.185  | 3 |
| 2SIC | 4.378  | 1 |
| 2SNI | 4.838  | 1 |
| 2UUY | 4.660  | 1 |
| 2VIS | 3.572  | 2 |

7CEI            3.335            2

\*\*\*\*\*

Group 32s-

REMARK the docking benchmark.

REMARK Change the file name from GroupXXX.txt to represent your group's name.

REMARK Add raw and normalized scores in the table below.

REMARK Fill in the units in which the raw scores were computed below.

Raw scores are given in units of "occurrences of frequent interaction patterns"

|           | Raw score | normalized score |
|-----------|-----------|------------------|
| design_1  | 7.54      | 3                |
| design_2  | 7.74      | 3                |
| design_3  | 9.66      | 2                |
| design_4  | 8.01      | 3                |
| design_5  | 7.37      | 3                |
| design_6  | 9.61      | 2                |
| design_7  | 7.81      | 3                |
| design_8  | 8.70      | 3                |
| design_9  | 8.88      | 3                |
| design_10 | 6.63      | 4                |
| design_11 | 7.30      | 3                |
| design_12 | 8.00      | 3                |
| design_13 | 8.09      | 3                |
| design_14 | 6.55      | 4                |
| design_15 | 6.67      | 4                |
| design_16 | 8.55      | 3                |
| design_17 | 9.56      | 2                |
| design_18 | 8.09      | 3                |
| design_19 | 9.84      | 2                |
| design_20 | 9.74      | 2                |
| design_21 | 7.79      | 3                |
| design_22 | 9.65      | 2                |
| design_23 | 7.19      | 3                |
| design_24 | 9.92      | 2                |
| design_25 | 6.73      | 4                |
| design_26 | 5.92      | 4                |
| design_27 | 8.30      | 3                |
| design_28 | 6.07      | 4                |
| design_29 | 8.00      | 3                |
| design_30 | 8.38      | 3                |
| design_31 | 7.39      | 3                |
| design_32 | 6.69      | 4                |
| design_33 | 8.55      | 3                |
| design_34 | 7.29      | 3                |

|           |      |   |
|-----------|------|---|
| design_35 | 6.42 | 4 |
| design_36 | 8.92 | 3 |
| design_37 | 9.43 | 3 |
| design_38 | 9.76 | 2 |
| design_39 | 4.70 | 4 |
| design_40 | 7.89 | 3 |
| design_41 | 8.14 | 3 |
| design_42 | 8.06 | 3 |
| design_43 | 8.13 | 3 |
| design_44 | 9.00 | 3 |
| design_45 | 8.79 | 3 |
| design_46 | 8.60 | 3 |
| design_47 | 6.51 | 4 |
| design_48 | 6.99 | 4 |
| design_49 | 5.64 | 4 |
| design_50 | 5.57 | 4 |
| design_51 | 6.23 | 4 |
| design_52 | 8.24 | 3 |
| design_53 | 9.53 | 2 |
| design_54 | 7.09 | 3 |
| design_55 | 8.79 | 3 |
| design_56 | 7.75 | 3 |
| design_57 | 9.30 | 3 |
| design_58 | 9.19 | 3 |
| design_59 | 8.93 | 3 |
| design_60 | 8.40 | 3 |
| design_61 | 6.81 | 4 |
| design_62 | 9.53 | 2 |
| design_63 | 7.52 | 3 |
| design_64 | 8.03 | 3 |
| design_65 | 6.77 | 4 |
| design_66 | 9.13 | 3 |
| design_67 | 8.08 | 3 |
| design_68 | 9.53 | 2 |
| design_69 | 6.73 | 4 |
| design_70 | 4.44 | 4 |
| design_71 | 9.80 | 2 |
| design_72 | 9.45 | 3 |
| design_73 | 6.75 | 4 |
| design_74 | 6.26 | 4 |
| design_75 | 7.90 | 3 |
| design_76 | 8.74 | 3 |
| design_77 | 7.45 | 3 |
| design_78 | 6.95 | 4 |
| design_79 | 8.78 | 3 |
| design_80 | 7.51 | 3 |

|           |       |   |
|-----------|-------|---|
| design_81 | 8.59  | 3 |
| design_82 | 10.05 | 2 |
| design_83 | 9.23  | 3 |
| design_84 | 9.56  | 2 |
| design_85 | 7.18  | 3 |
| design_86 | 7.59  | 3 |
| design_87 | 7.36  | 3 |
| 1A2K      | 10.26 | 2 |
| 1ACB      | 14.57 | 2 |
| 1AHW      | 8.98  | 3 |
| 1AK4      | 12.49 | 2 |
| 1AKJ      | 9.34  | 3 |
| 1AVX      | 23.91 | 1 |
| 1AY7      | 11.67 | 2 |
| 1AZS      | 5.99  | 4 |
| 1B6C      | 8.60  | 3 |
| 1BGX      | 11.66 | 2 |
| 1BJ1      | 13.56 | 2 |
| 1BKD      | 14.15 | 2 |
| 1BUH      | 5.68  | 4 |
| 1BVK      | 12.78 | 2 |
| 1BVN      | 10.15 | 2 |
| 1CGI      | 13.48 | 2 |
| 1D6R      | 15.29 | 1 |
| 1DE4      | 8.99  | 3 |
| 1DFJ      | 7.98  | 3 |
| 1DQJ      | 13.28 | 2 |
| 1E4K      | 8.85  | 3 |
| 1E6J      | 10.35 | 2 |
| 1.00E+96  | 7.61  | 3 |
| 1EAW      | 15.91 | 1 |
| 1EER      | 10.45 | 2 |
| 1EFN      | 7.84  | 3 |
| 1EWY      | 9.48  | 3 |
| 1EZU      | 14.48 | 2 |
| 1F34      | 11.24 | 2 |
| 1F51      | 9.52  | 2 |
| 1FAK      | 7.64  | 3 |
| 1FC2      | 8.44  | 3 |
| 1FQ1      | 9.17  | 3 |
| 1FQJ      | 11.91 | 2 |
| 1FSK      | 10.44 | 2 |
| 1GCQ      | 8.21  | 3 |
| 1GHQ      | 8.47  | 3 |
| 1GLA      | 8.86  | 3 |
| 1GP2      | 9.74  | 2 |

|      |       |   |
|------|-------|---|
| 1GPW | 9.40  | 3 |
| 1GRN | 14.53 | 2 |
| 1H1V | 12.20 | 2 |
| 1HE1 | 13.52 | 2 |
| 1HE8 | 7.76  | 3 |
| 1HIA | 16.11 | 1 |
| 1I2M | 10.65 | 2 |
| 1I4D | 9.44  | 3 |
| 1I9R | 8.23  | 3 |
| 1IB1 | 9.55  | 2 |
| 1IBR | 10.03 | 2 |
| 1IJK | 9.13  | 3 |
| 1IQD | 10.68 | 2 |
| 1IRA | 9.98  | 2 |
| 1J2J | 9.17  | 3 |
| 1JMO | 13.23 | 2 |
| 1JPS | 8.88  | 3 |
| 1K4C | 13.85 | 2 |
| 1K5D | 12.26 | 2 |
| 1K74 | 13.52 | 2 |
| 1KAC | 9.43  | 3 |
| 1KKL | 13.22 | 2 |
| 1KLU | 9.78  | 2 |
| 1KTZ | 6.56  | 4 |
| 1KXP | 14.68 | 2 |
| 1KXQ | 10.52 | 2 |
| 1M10 | 12.11 | 2 |
| 1MAH | 12.09 | 2 |
| 1ML0 | 9.26  | 3 |
| 1MLC | 11.86 | 2 |
| 1N2C | 16.53 | 1 |
| 1N80 | 14.58 | 2 |
| 1NCA | 12.85 | 2 |
| 1NSN | 9.40  | 3 |
| 1NW9 | 9.70  | 2 |
| 1OPH | 25.54 | 1 |
| 1PPE | 25.24 | 1 |
| 1PXV | 15.48 | 1 |
| 1QA9 | 7.16  | 3 |
| 1QFW | 9.86  | 2 |
| 1R0R | 16.75 | 1 |
| 1R8S | 11.02 | 2 |
| 1RLB | 9.06  | 3 |
| 1S1Q | 9.66  | 2 |
| 1SBB | 9.00  | 3 |
| 1T6B | 11.46 | 2 |

|      |       |   |
|------|-------|---|
| 1UDI | 11.75 | 2 |
| 1VFB | 13.99 | 2 |
| 1WEJ | 7.28  | 3 |
| 1WQ1 | 11.20 | 2 |
| 1XD3 | 11.41 | 2 |
| 1XQS | 9.70  | 2 |
| 1Y64 | 8.66  | 3 |
| 1YVB | 11.29 | 2 |
| 1Z0K | 10.25 | 2 |
| 1Z5Y | 9.73  | 2 |
| 1ZHI | 10.96 | 2 |
| 2AJF | 10.47 | 2 |
| 2B42 | 12.76 | 2 |
| 2C0L | 10.21 | 2 |
| 2CFH | 12.15 | 2 |
| 2FD6 | 6.04  | 4 |
| 2H7V | 10.03 | 2 |
| 2HLE | 10.83 | 2 |
| 2HMI | 9.57  | 2 |
| 2HQS | 8.79  | 3 |
| 2HRK | 8.79  | 3 |
| 2I25 | 11.34 | 2 |
| 2JEL | 8.23  | 3 |
| 2MTA | 6.92  | 4 |
| 2NZ8 | 13.52 | 2 |
| 2O8V | 9.38  | 3 |
| 2O0B | 8.70  | 3 |
| 2OT3 | 9.94  | 2 |
| 2PCC | 6.74  | 4 |
| 2QFW | 7.09  | 3 |
| 2SIC | 15.69 | 1 |
| 2SNI | 14.46 | 2 |
| 2UUY | 16.97 | 1 |
| 2VIS | 15.79 | 1 |
| 7CEI | 8.78  | 3 |

\*\*\*\*\*

Group 33s -

Raw scores are linear combinations of vdW, electrostatic potential, solvation as well as a knowledge based terms

|          | Raw score | normalized score |
|----------|-----------|------------------|
| design_1 | -6149.89  | 5                |
| design_2 | -6056.9   | 5                |
| design_3 | -7068.63  | 5                |
| design_4 | -6812.61  | 5                |
| design_5 | -5562.09  | 3                |

|           |           |   |
|-----------|-----------|---|
| design_6  | -5375.61  | 3 |
| design_7  | -8099.27  | 2 |
| design_8  | -5069.54  | 3 |
| design_9  | -7049.64  | 5 |
| design_10 | -7193.2 5 |   |
| design_11 | -6843.25  | 5 |
| design_12 | -7365.21  | 5 |
| design_13 | -5922.59  | 3 |
| design_14 | -4692.49  | 3 |
| design_15 | -5216.05  | 3 |
| design_16 | -8049.22  | 2 |
| design_17 | -6739.93  | 5 |
| design_18 | -7504 2   |   |
| design_19 | -6131.61  | 5 |
| design_20 | -7935.78  | 2 |
| design_21 | -7619.84  | 2 |
| design_22 | -5795.06  | 3 |
| design_23 | -5579.71  | 3 |
| design_24 | -5652.95  | 3 |
| design_25 | -5802.69  | 3 |
| design_26 | -8322.78  | 2 |
| design_27 | -6526.95  | 5 |
| design_28 | -5096.19  | 3 |
| design_29 | -6135.18  | 5 |
| design_30 | -7320.04  | 5 |
| design_31 | -5865.2 3 |   |
| design_32 | -5679.57  | 3 |
| design_33 | -6950.94  | 5 |
| design_34 | -9252.39  | 2 |
| design_35 | -9085.81  | 2 |
| design_36 | -6521.74  | 5 |
| design_37 | -6338.99  | 5 |
| design_38 | -7151.85  | 5 |
| design_39 | -7216.29  | 5 |
| design_40 | -6794.72  | 5 |
| design_41 | -7061.05  | 5 |
| design_42 | -6270.39  | 5 |
| design_43 | -7003.14  | 5 |
| design_44 | -7342.44  | 5 |
| design_45 | -8123.37  | 2 |
| design_46 | -5538.8 3 |   |
| design_47 | -7254.36  | 5 |
| design_48 | -7046.99  | 5 |
| design_49 | -5188.31  | 3 |
| design_50 | -5922.71  | 3 |
| design_51 | -6167.84  | 5 |



|           |           |   |
|-----------|-----------|---|
| design_52 | -8088.45  | 2 |
| design_53 | -8668.82  | 2 |
| design_54 | -5635.14  | 3 |
| design_55 | -5111.67  | 3 |
| design_56 | -6155.46  | 5 |
| design_57 | -8004.78  | 2 |
| design_58 | -7393.19  | 5 |
| design_59 | -6484.32  | 5 |
| design_60 | -6385.02  | 5 |
| design_61 | -7390.72  | 5 |
| design_62 | -6673.9 5 |   |
| design_63 | -5797.31  | 3 |
| design_64 | -6219.41  | 5 |
| design_65 | -8121.46  | 2 |
| design_66 | -7653.03  | 2 |
| design_67 | -4503.54  | 3 |
| design_68 | -5476.3 3 |   |
| design_69 | -8405.98  | 2 |
| design_70 | -5610.76  | 3 |
| design_71 | -6563.23  | 5 |
| design_72 | -9184.3 2 |   |
| design_73 | -5307.61  | 3 |
| design_74 | -5863.4 3 |   |
| design_75 | -5278.38  | 3 |
| design_76 | -7289.84  | 5 |
| design_77 | -7909.3 2 |   |
| design_78 | -5255.46  | 3 |
| design_79 | -4445.84  | 3 |
| design_80 | -5579.95  | 3 |
| design_81 | -6342.2 5 |   |
| design_82 | -6127.26  | 5 |
| design_83 | -8127.99  | 2 |
| design_84 | -6019.38  | 5 |
| design_85 | -8380.39  | 2 |
| design_86 | -5875 3   |   |
| design_87 | -7346.99  | 5 |
| 1A2K      | -16462.2  | 1 |
| 1ACB      | -9090.35  | 2 |
| 1AHW      | -23307.6  | 1 |
| 1AK4      | -5683.02  | 3 |
| 1AKJ      | -29101.5  | 1 |
| 1AVX      | -10099.4  | 1 |
| 1AY7      | -5797.01  | 3 |
| 1AZS      | -21551.5  | 1 |
| 1B6C      | -8548.57  | 2 |
| 1BGX      | -31744.6  | 1 |

|      |          |   |
|------|----------|---|
| 1BJ1 | -34392.7 | 1 |
| 1BKD | -15948.3 | 1 |
| 1BUH | -6253.16 | 5 |
| 1BVK | -13279.7 | 1 |
| 1BVN | -12134.2 | 1 |
| 1CGI | -11684   | 1 |
| 1D6R | -7261.67 | 5 |
| 1DE4 | -47252.7 | 1 |
| 1DFJ | -10449.8 | 1 |
| 1DQJ | -22158.9 | 1 |
| 1E4K | -18866.3 | 1 |
| 1E6J | -19608.6 | 1 |
| 1E96 | -5590.24 | 3 |
| 1EAW | -9202.65 | 2 |
| 1EER | -16120.2 | 1 |
| 1EFN | -5369.71 | 3 |
| 1EWY | -7023.89 | 5 |
| 1EZU | -26115   | 1 |
| 1F34 | -12743.2 | 1 |
| 1F51 | -23624.1 | 1 |
| 1FAK | -20907.5 | 1 |
| 1FC2 | -5372.28 | 3 |
| 1FQ1 | -6733.55 | 5 |
| 1FQJ | -11322   | 1 |
| 1FSK | -25046.1 | 1 |
| 1GCQ | -5183.11 | 3 |
| 1GHQ | -3605.25 | 3 |
| 1GLA | -6906.43 | 5 |
| 1GP2 | -31881.9 | 1 |
| 1GPW | -10255.2 | 1 |
| 1GRN | -8944.74 | 2 |
| 1H1V | -8829.6  | 2 |
| 1HE1 | -9905.52 | 1 |
| 1HE8 | -7092.59 | 5 |
| 1HIA | -34826.4 | 1 |
| 1I2M | -11183.3 | 1 |
| 1I4D | -22456.8 | 1 |
| 1I9R | -45643   | 1 |
| 1IB1 | -22751.1 | 1 |
| 1IBR | -14720.4 | 1 |
| 1IJK | -27160.4 | 1 |
| 1IQD | -23429.2 | 1 |
| 1IRA | -13596.2 | 1 |
| 1J2J | -5800.09 | 3 |
| 1JMO | -31112   | 1 |
| 1JPS | -23862.8 | 1 |

|      |          |   |
|------|----------|---|
| 1K4C | -22614.1 | 1 |
| 1K5D | -35267.6 | 1 |
| 1K74 | -21259.5 | 1 |
| 1KAC | -6221.35 | 5 |
| 1KKL | -30623.6 | 1 |
| 1KLU | -27418.3 | 1 |
| 1KTZ | -3980.51 | 3 |
| 1KXP | -12474.6 | 1 |
| 1KXQ | -10066.3 | 1 |
| 1M10 | -10560   | 1 |
| 1MAH | -9509.98 | 1 |
| 1ML0 | -22721.2 | 1 |
| 1MLC | -21410.2 | 1 |
| 1N2C | -192251  | 1 |
| 1N80 | -37013.3 | 1 |
| 1NCA | -23564.3 | 1 |
| 1NSN | -20025.4 | 1 |
| 1NW9 | -9884.29 | 1 |
| 1OPH | -6538.53 | 5 |
| 1PPE | -9453.91 | 2 |
| 1PXV | -10719.9 | 1 |
| 1QA9 | -8934.37 | 2 |
| 1QFW | -21564.5 | 1 |
| 1R0R | -8100.49 | 2 |
| 1R8S | -12168.3 | 1 |
| 1RLB | -31765.1 | 1 |
| 1S1Q | -4658.88 | 3 |
| 1SBB | -4900.7  | 3 |
| 1T6B | -8342.11 | 2 |
| 1UDI | -7744.8  | 2 |
| 1VFB | -13119.7 | 1 |
| 1WEJ | -24860.9 | 1 |
| 1WQ1 | -12399   | 1 |
| 1XD3 | -10266.5 | 1 |
| 1XQS | -12011.3 | 1 |
| 1Y64 | -9041.25 | 2 |
| 1YVB | -9032.23 | 2 |
| 1Z0K | -8401.79 | 2 |
| 1Z5Y | -7403.15 | 5 |
| 1ZHI | -5016.17 | 3 |
| 2AJF | -7102.21 | 5 |
| 2B42 | -9746.03 | 1 |
| 2C0L | -9415.78 | 2 |
| 2CFH | -11306.7 | 1 |
| 2FD6 | -21367.3 | 1 |
| 2H7V | -7013.89 | 5 |

|      |          |   |
|------|----------|---|
| 2HLE | -10336.4 | 1 |
| 2HMI | -45606   | 1 |
| 2HQS | -11138.4 | 1 |
| 2HRK | -5953.38 | 3 |
| 2I25 | -5643.07 | 3 |
| 2JEL | -21932.1 | 1 |
| 2MTA | -19783.9 | 1 |
| 2NZ8 | -12770.7 | 1 |
| 2O8V | -7675.77 | 2 |
| 2O0B | -4266.58 | 3 |
| 2OT3 | -12279.9 | 1 |
| 2PCC | -6076.02 | 5 |
| 2QFW | -20194.1 | 1 |
| 2SIC | -8946.57 | 2 |
| 2SNI | -9128.92 | 2 |
| 2UUY | -8573.8  | 2 |
| 2VIS | -21264.7 | 1 |
| 7CEI | -6743.58 | 5 |

\*\*\*\*\*

#### Group 35s-

To discriminate between the native protein-protein interfaces and the designed ones, we chose to use a set of four metrics that can be computed from the structures: predicted binding energy per interface area, number of unsatisfied hydrogen bonds per interface area, ratio of hydrogen bond energy to total binding energy and the RosettaHoles score. All designed and native structures used in this analysis were repacked and minimized using the Rosetta energy function.

The predicted binding energy was calculated by taking the difference in energy between the structure of the complex and the separated binding partners. The area of the interface was computed in the same manner. The first metric,  $dG/dSASA$ , was obtained by dividing the binding energy by the area of the interface. The second metric,  $Unsat/dSASA$ , is the number of buried-unsatisfied polar atoms located at the interface divided by the area of the interface. The third metric,  $HBond\ energy/dG$ , is the proportion of hydrogen bond energy to the total binding energy.

A normal distribution was fit to each of the described metrics for native structures with resolution better than or equal to 2.2 angstroms. The corresponding cumulative distribution function for each metric was used to represent a score for how well a structure compares to natives. For each metric a score of 1.0 represents an above average comparison to natives while a score of 0.0 represents no correspondence to natives.

The final metric is the RosettaHoles score. The RosettaHoles score represents the probability that a set of solvent inaccessible voids comes

from a high-resolution crystal structure. Voids are determined by finding the largest spherical hole adjacent to all buried atoms, pruning away solvent accessible regions, and then clustering the holes into contiguous cavities. The scores for this metric are similar to the previous three, with 1.0 being ideal and 0.0 being completely unlike native proteins.

The scores for each of the four metrics for all native and designed structures were summed to yield the final raw score. This score ranged between 0.0 and 4.0 with 0.0 being no correspondence to native interfaces (does not bind) and 4.0 being as good as or better than native interfaces (binds). The normalized scores are as follows where RS represents the raw score: 4 (does not bind) for  $RS < 1.5$ ; 3 (likely not to bind) for  $1.5 < RS < 2.0$ ; 2 (likely to bind) for  $2.0 < RS < 2.5$ ; 1 (binds) for  $RS > 2.5$ .

Some native structures were not evaluated due to problems obtaining a suitable minimized structure.

REMARK KuhlmanGroup scores for CAPRI round 21

REMARK Method described in KuhlmanMethod.txt

Raw scores are the sum of three cumulative distribution functions and the RosettaHoles score.

The raw score ranges from 0.0-4.0 with a higher score being more likely to bind.

| MODEL     | Raw_score | Normalized_score |
|-----------|-----------|------------------|
| design_1  | 1.74      | 3                |
| design_2  | 0.97      | 4                |
| design_3  | 1.54      | 3                |
| design_4  | 1.50      | 3                |
| design_5  | 0.81      | 4                |
| design_6  | 1.08      | 4                |
| design_7  | 1.17      | 4                |
| design_8  | 1.58      | 3                |
| design_9  | 1.42      | 4                |
| design_10 | 1.43      | 4                |
| design_11 | 1.28      | 4                |
| design_12 | 1.31      | 4                |
| design_13 | 1.66      | 3                |
| design_14 | 1.30      | 4                |
| design_15 | 0.98      | 4                |
| design_16 | 1.40      | 4                |
| design_17 | 1.33      | 4                |
| design_18 | 1.05      | 4                |
| design_19 | 0.93      | 4                |
| design_20 | 1.50      | 3                |
| design_21 | 1.44      | 4                |
| design_22 | 1.92      | 3                |

|           |      |   |
|-----------|------|---|
| design_23 | 1.29 | 4 |
| design_24 | 1.58 | 3 |
| design_25 | 1.80 | 3 |
| design_26 | 2.07 | 2 |
| design_27 | 1.56 | 3 |
| design_28 | 0.66 | 4 |
| design_29 | 1.63 | 3 |
| design_30 | 1.52 | 3 |
| design_31 | 0.74 | 4 |
| design_32 | 1.23 | 4 |
| design_33 | 1.54 | 3 |
| design_34 | 1.16 | 4 |
| design_35 | 1.48 | 4 |
| design_36 | 1.04 | 4 |
| design_37 | 1.56 | 3 |
| design_38 | 1.82 | 3 |
| design_39 | 1.30 | 4 |
| design_40 | 1.19 | 4 |
| design_41 | 1.12 | 4 |
| design_42 | 0.95 | 4 |
| design_43 | 1.52 | 3 |
| design_44 | 0.72 | 4 |
| design_45 | 1.19 | 4 |
| design_46 | 0.92 | 4 |
| design_47 | 1.60 | 3 |
| design_48 | 1.01 | 4 |
| design_49 | 1.70 | 3 |
| design_50 | 1.82 | 3 |
| design_51 | 1.11 | 4 |
| design_52 | 1.15 | 4 |
| design_53 | 1.41 | 4 |
| design_54 | 1.48 | 4 |
| design_55 | 1.67 | 3 |
| design_56 | 1.02 | 4 |
| design_57 | 1.17 | 4 |
| design_58 | 0.97 | 4 |
| design_59 | 1.18 | 4 |
| design_60 | 1.12 | 4 |
| design_61 | 1.62 | 3 |
| design_62 | 1.68 | 3 |
| design_63 | 1.22 | 4 |
| design_64 | 1.17 | 4 |
| design_65 | 1.31 | 4 |
| design_66 | 1.36 | 4 |
| design_67 | 1.13 | 4 |
| design_68 | 1.12 | 4 |

|           |      |   |
|-----------|------|---|
| design_69 | 1.47 | 4 |
| design_70 | 1.12 | 4 |
| design_71 | 0.98 | 4 |
| design_72 | 0.82 | 4 |
| design_73 | 1.47 | 4 |
| design_74 | 1.86 | 3 |
| design_75 | 1.51 | 3 |
| design_76 | 0.86 | 4 |
| design_77 | 0.97 | 4 |
| design_78 | 0.96 | 4 |
| design_79 | 1.54 | 3 |
| design_80 | 1.79 | 3 |
| design_81 | 0.84 | 4 |
| design_82 | 1.52 | 3 |
| design_83 | 1.64 | 3 |
| design_84 | 1.76 | 3 |
| design_85 | 0.91 | 4 |
| design_86 | 0.78 | 4 |
| design_87 | 1.53 | 3 |
| 1A2K      | 1.95 | 3 |
| 1ACB      | 1.58 | 3 |
| 1AHW      | 2.40 | 2 |
| 1AK4      | 2.01 | 2 |
| 1AKJ      | 2.83 | 1 |
| 1AVX      | 1.59 | 3 |
| 1AY7      | 2.86 | 1 |
| 1AZS      | 1.26 | 4 |
| 1B6C      | 1.42 | 4 |
| 1BGX      | 0.71 | 4 |
| 1BJ1      | 2.54 | 1 |
| 1BKD      | 2.18 | 2 |
| 1BUH      | 1.43 | 4 |
| 1BVK      | 2.94 | 1 |
| 1BVN      | 2.10 | 2 |
| 1CGI      | 1.47 | 4 |
| 1D6R      | 2.42 | 2 |
| 1DE4      | 1.75 | 3 |
| 1DFJ      | 1.66 | 3 |
| 1DQJ      | 2.21 | 2 |
| 1E4K      | 0.88 | 4 |
| 1E6J      | 2.12 | 2 |
| 1E96      | 1.35 | 4 |
| 1EAW      | 2.58 | 1 |
| 1EER      | 2.79 | 1 |
| 1EFN      | 2.02 | 2 |
| 1EWY      | nd   | 5 |

|      |      |   |
|------|------|---|
| 1EZU | 2.08 | 2 |
| 1F34 | 1.22 | 4 |
| 1F51 | 1.44 | 4 |
| 1FAK | 2.55 | 1 |
| 1FC2 | 1.09 | 4 |
| 1FQ1 | 1.85 | 3 |
| 1FQJ | 2.79 | 1 |
| 1FSK | 1.91 | 3 |
| 1GCQ | 1.63 | 3 |
| 1GHQ | 1.40 | 4 |
| 1GLA | 1.50 | 3 |
| 1GP2 | 1.60 | 3 |
| 1GPW | 1.53 | 3 |
| 1GRN | 2.03 | 2 |
| 1H1V | 2.08 | 2 |
| 1HE1 | 1.76 | 3 |
| 1HE8 | 2.45 | 2 |
| 1HIA | 2.21 | 2 |
| 1I2M | 2.70 | 1 |
| 1I4D | 1.34 | 4 |
| 1I9R | 1.47 | 4 |
| 1IB1 | 2.40 | 2 |
| 1IBR | 2.10 | 2 |
| 1IJK | 2.08 | 2 |
| 1IQD | 2.78 | 1 |
| 1IRA | 1.91 | 3 |
| 1J2J | 1.20 | 4 |
| 1JMO | 2.49 | 2 |
| 1JPS | 3.33 | 1 |
| 1K4C | 2.48 | 2 |
| 1K5D | 1.08 | 4 |
| 1K74 | 1.79 | 3 |
| 1KAC | 1.84 | 3 |
| 1KKL | 1.61 | 3 |
| 1KLU | 1.97 | 3 |
| 1KTZ | 2.87 | 1 |
| 1KXP | 1.83 | 3 |
| 1KXQ | 1.68 | 3 |
| 1M10 | 2.16 | 2 |
| 1MAH | 1.40 | 4 |
| 1ML0 | 2.12 | 2 |
| 1MLC | 1.93 | 3 |
| 1N2C | 1.55 | 3 |
| 1N80 | 2.03 | 2 |
| 1NCA | 2.01 | 2 |
| 1NSN | 2.19 | 2 |



|      |      |   |
|------|------|---|
| 1NW9 | 2.22 | 2 |
| 1OPH | 1.91 | 3 |
| 1PPE | 2.22 | 2 |
| 1PXV | 2.31 | 2 |
| 1QA9 | 2.89 | 1 |
| 1QFW | 2.37 | 2 |
| 1R0R | 2.84 | 1 |
| 1R8S | 1.74 | 3 |
| 1RLB | 1.04 | 4 |
| 1S1Q | 2.19 | 2 |
| 1SBB | 2.25 | 2 |
| 1T6B | 1.80 | 3 |
| 1UDI | 2.04 | 2 |
| 1VFB | 3.14 | 1 |
| 1WEJ | 2.46 | 2 |
| 1WQ1 | 0.84 | 4 |
| 1XD3 | 2.16 | 2 |
| 1XQS | 1.83 | 3 |
| 1Y64 | nd   | 5 |
| 1YVB | 0.74 | 4 |
| 1Z0K | 2.66 | 1 |
| 1Z5Y | 2.11 | 2 |
| 1ZHI | 2.15 | 2 |
| 2AJF | 1.64 | 3 |
| 2B42 | 1.42 | 4 |
| 2C0L | 1.90 | 3 |
| 2CFH | 1.55 | 3 |
| 2FD6 | 2.98 | 1 |
| 2H7V | 1.78 | 3 |
| 2HLE | 2.54 | 1 |
| 2HQS | 2.10 | 2 |
| 2HRK | 0.75 | 4 |
| 2I25 | 2.36 | 2 |
| 2JEL | 2.89 | 1 |
| 2MTA | 0.96 | 4 |
| 2NZ8 | 1.82 | 3 |
| 2O8V | nd   | 5 |
| 2O0B | 1.93 | 3 |
| 2OT3 | nd   | 5 |
| 2PCC | 2.31 | 2 |
| 2QFW | 1.97 | 3 |
| 2SIC | 1.54 | 3 |
| 2SNI | 1.84 | 3 |
| 2UUY | 2.32 | 2 |
| 2VIS | 1.91 | 3 |
| 7CEI | 2.34 | 2 |

\*\*\*\*\*

Group 36s-

ITScore/PP [1] was used to evaluate the 87 designed complex models from the Baker lab and 120 native complexes of T45. ITCscore/PP is an all-atomic distance-dependent knowledge-based scoring function derived by a new iterative method that circumvents the long-standing reference state problem in the knowledge-based/statistical approaches. The basic idea of the method is to improve a set of effective pair potentials by iteration until the derived potentials can reproduce the atomic pair distribution functions in experimentally determined complex structures [2,3]. In addition to circumventing the reference state problem by iteration, another major advantage of ITCscore/PP is that it considers the binding energy landscape of the complexes by including both the native structures and decoys according to a Boltzmann probability, instead of considering only the energy minima (i.e., native structures) like what conventional knowledge-based scoring functions do [4]. ITCscore/PP was derived on the basis of 20 heavy atom types and 851 biological protein-protein complex structures [1].

ITScore/PP has been extensively validated with diverse benchmarks [1] and the recent CAPRI experiments [5] for its ability in binding mode prediction. However, further improvements are still needed for ITCscore/PP in future studies, particularly for the purpose of discriminating binders from non-binders (like the CAPRI experiments in round 20 and 21). First, current ITCscore/PP consists of only the inter-molecular interaction potentials. In order to better evaluate computationally designed models, it will be necessary for ITCscore/PP to include intra-molecular interaction energy terms such as the torsional energies from side-chains and backbones. Second, entropy is currently ignored in ITCscore/PP and needs to be included [6].

[1] Huang S-Y, Zou X. An iterative knowledge-based scoring function for protein-protein recognition. *Proteins* 2008;72:557-579.

[2] Huang S-Y, Zou X. An iterative knowledge-based scoring function to predict protein-ligand interactions: I. Derivation of interaction potentials. *J Comput Chem* 2006;27:1865-1875.

[3] Huang S-Y, Zou X. An iterative knowledge-based scoring function to predict protein-ligand interactions: II. Validation of the scoring function. *J Comput Chem* 2006;27:1876-1882.

[4] Huang S-Y, Zou X. Mean-force scoring functions for protein-ligand binding. *Annu Rep Comput Chem* 2010;6:281-296.(in press)

[5] Huang S-Y, Zou X. MDockPP: A hierarchical approach for protein-protein docking and its application to CAPRI rounds 15-19. 2010, DOI: 10.1002/prot.22797.

[6] Huang S-Y, Zou X. Inclusion of solvation and entropy in the knowledge-based scoring function for protein-ligand interactions. J Chem Inf Model 2010;50:262-273.

Raw scores are given in units of knowledge-based potentials that are not scaled to the experimental affinity data.

|           | Raw score | normalized score |
|-----------|-----------|------------------|
| design_1  | -145.302  | 4                |
| design_2  | -139.746  | 4                |
| design_3  | -226.956  | 1                |
| design_4  | -120.767  | 4                |
| design_5  | -137.660  | 4                |
| design_6  | -161.184  | 3                |
| design_7  | -174.954  | 3                |
| design_8  | -172.194  | 3                |
| design_9  | -131.343  | 4                |
| design_10 | -141.188  | 4                |
| design_11 | -129.587  | 4                |
| design_12 | -180.953  | 5                |
| design_13 | -153.922  | 3                |
| design_14 | -160.362  | 3                |
| design_15 | -182.927  | 5                |
| design_16 | -184.665  | 5                |
| design_17 | -155.229  | 3                |
| design_18 | -156.503  | 3                |
| design_19 | -191.344  | 5                |
| design_20 | -260.669  | 1                |
| design_21 | -154.823  | 3                |
| design_22 | -178.583  | 5                |
| design_23 | -173.932  | 3                |
| design_24 | -188.239  | 5                |
| design_25 | -131.907  | 4                |
| design_26 | -158.362  | 3                |
| design_27 | -154.079  | 3                |
| design_28 | -161.448  | 3                |
| design_29 | -183.792  | 5                |
| design_30 | -224.418  | 2                |
| design_31 | -131.271  | 4                |
| design_32 | -118.529  | 4                |
| design_33 | -214.338  | 2                |
| design_34 | -213.088  | 2                |
| design_35 | -215.810  | 2                |

|           |          |   |
|-----------|----------|---|
| design_36 | -147.137 | 4 |
| design_37 | -182.173 | 5 |
| design_38 | -218.510 | 2 |
| design_39 | -137.108 | 4 |
| design_40 | -152.208 | 3 |
| design_41 | -160.137 | 3 |
| design_42 | -160.590 | 3 |
| design_43 | -180.443 | 5 |
| design_44 | -204.018 | 2 |
| design_45 | -191.022 | 5 |
| design_46 | -138.927 | 4 |
| design_47 | -161.761 | 3 |
| design_48 | -165.333 | 3 |
| design_49 | -163.911 | 3 |
| design_50 | -172.478 | 3 |
| design_51 | -203.662 | 2 |
| design_52 | -198.505 | 5 |
| design_53 | -172.758 | 3 |
| design_54 | -149.281 | 4 |
| design_55 | -161.674 | 3 |
| design_56 | -150.012 | 3 |
| design_57 | -207.741 | 2 |
| design_58 | -171.397 | 3 |
| design_59 | -172.007 | 3 |
| design_60 | -142.899 | 4 |
| design_61 | -193.489 | 5 |
| design_62 | -191.447 | 5 |
| design_63 | -187.762 | 5 |
| design_64 | -123.810 | 4 |
| design_65 | -151.448 | 3 |
| design_66 | -170.220 | 3 |
| design_67 | -157.723 | 3 |
| design_68 | -137.584 | 4 |
| design_69 | -170.724 | 3 |
| design_70 | -146.584 | 4 |
| design_71 | -203.157 | 2 |
| design_72 | -178.247 | 5 |
| design_73 | -137.232 | 4 |
| design_74 | -132.643 | 4 |
| design_75 | -148.768 | 4 |
| design_76 | -200.476 | 2 |
| design_77 | -183.426 | 5 |
| design_78 | -133.858 | 4 |
| design_79 | -129.782 | 4 |
| design_80 | -135.108 | 4 |
| design_81 | -195.870 | 5 |

|           |          |   |
|-----------|----------|---|
| design_82 | -181.330 | 5 |
| design_83 | -260.885 | 1 |
| design_84 | -199.564 | 5 |
| design_85 | -191.827 | 5 |
| design_86 | -128.349 | 4 |
| design_87 | -179.371 | 5 |
| 1A2K      | -222.155 | 2 |
| 1ACB      | -220.671 | 2 |
| 1AHW      | -235.828 | 1 |
| 1AK4      | -139.462 | 4 |
| 1AKJ      | -203.935 | 2 |
| 1AVX      | -290.994 | 1 |
| 1AY7      | -199.636 | 5 |
| 1AZS      | -253.324 | 1 |
| 1B6C      | -210.181 | 2 |
| 1BGX      | -627.896 | 1 |
| 1BJ1      | -328.285 | 1 |
| 1BKD      | -387.047 | 1 |
| 1BUH      | -171.780 | 3 |
| 1BVK      | -163.737 | 3 |
| 1BVN      | -299.563 | 1 |
| 1CGI      | -303.881 | 1 |
| 1D6R      | -163.184 | 3 |
| 1DE4      | -279.442 | 1 |
| 1DFJ      | -238.882 | 1 |
| 1DQJ      | -239.573 | 1 |
| 1E4K      | -135.847 | 4 |
| 1E6J      | -151.741 | 3 |
| 1E96      | -170.931 | 3 |
| 1EAW      | -260.874 | 1 |
| 1EER      | -478.606 | 1 |
| 1EFN      | -192.374 | 5 |
| 1EWY      | -114.048 | 4 |
| 1EZU      | -356.185 | 1 |
| 1F34      | -343.051 | 1 |
| 1F51      | -217.358 | 2 |
| 1FAK      | -336.361 | 1 |
| 1FC2      | -166.494 | 3 |
| 1FQ1      | -153.896 | 3 |
| 1FQJ      | -213.775 | 2 |
| 1FSK      | -262.823 | 1 |
| 1GCQ      | -173.798 | 3 |
| 1GHQ      | -65.460  | 4 |
| 1GLA      | -149.922 | 4 |
| 1GP2      | -282.372 | 1 |
| 1GPW      | -247.649 | 1 |

|      |          |   |
|------|----------|---|
| 1GRN | -255.811 | 1 |
| 1H1V | -179.161 | 5 |
| 1HE1 | -269.257 | 1 |
| 1HE8 | -154.571 | 3 |
| 1HIA | -248.208 | 1 |
| 1I2M | -423.682 | 1 |
| 1I4D | -177.368 | 5 |
| 1I9R | -156.891 | 3 |
| 1IB1 | -297.654 | 1 |
| 1IBR | -436.202 | 1 |
| 1IJK | -218.550 | 2 |
| 1IQD | -337.312 | 1 |
| 1IRA | -334.964 | 1 |
| 1J2J | -140.879 | 4 |
| 1JMO | -497.300 | 1 |
| 1JPS | -270.273 | 1 |
| 1K4C | -291.518 | 1 |
| 1K5D | -308.468 | 1 |
| 1K74 | -193.584 | 5 |
| 1KAC | -148.475 | 4 |
| 1KKL | -168.281 | 3 |
| 1KLU | -183.488 | 5 |
| 1KTZ | -147.794 | 4 |
| 1KXP | -366.884 | 1 |
| 1KXQ | -278.268 | 1 |
| 1M10 | -230.067 | 1 |
| 1MAH | -240.411 | 1 |
| 1ML0 | -285.507 | 1 |
| 1MLC | -218.818 | 2 |
| 1N2C | -487.419 | 1 |
| 1N80 | -260.992 | 1 |
| 1NCA | -228.299 | 1 |
| 1NSN | -166.140 | 3 |
| 1NW9 | -289.895 | 1 |
| 1OPH | -228.973 | 1 |
| 1PPE | -286.507 | 1 |
| 1PXV | -326.183 | 1 |
| 1QA9 | -155.771 | 3 |
| 1QFW | -184.418 | 5 |
| 1R0R | -220.131 | 2 |
| 1R8S | -374.606 | 1 |
| 1RLB | -118.714 | 4 |
| 1S1Q | -128.508 | 4 |
| 1SBB | -127.819 | 4 |
| 1T6B | -192.473 | 5 |
| 1UDI | -211.140 | 2 |

|      |          |   |
|------|----------|---|
| 1VFB | -185.018 | 5 |
| 1WEJ | -224.914 | 2 |
| 1WQ1 | -303.424 | 1 |
| 1XD3 | -314.161 | 1 |
| 1XQS | -322.157 | 1 |
| 1Y64 | -141.019 | 4 |
| 1YVB | -196.599 | 5 |
| 1Z0K | -248.840 | 1 |
| 1Z5Y | -196.354 | 5 |
| 1ZHI | -159.094 | 3 |
| 2AJF | -158.559 | 3 |
| 2B42 | -331.869 | 1 |
| 2C0L | -225.499 | 1 |
| 2CFH | -344.390 | 1 |
| 2FD6 | -172.843 | 3 |
| 2H7V | -191.404 | 5 |
| 2HLE | -270.510 | 1 |
| 2HMI | -132.249 | 4 |
| 2HQS | -272.134 | 1 |
| 2HRK | -152.068 | 3 |
| 2I25 | -253.316 | 1 |
| 2JEL | -192.712 | 5 |
| 2MTA | -110.883 | 4 |
| 2NZ8 | -318.314 | 1 |
| 2O8V | -218.270 | 2 |
| 2O0B | -90.480  | 4 |
| 2OT3 | -340.345 | 1 |
| 2PCC | -92.675  | 4 |
| 2QFW | -177.254 | 5 |
| 2SIC | -223.171 | 2 |
| 2SNI | -224.962 | 2 |
| 2UUY | -235.849 | 1 |
| 2VIS | -136.422 | 4 |
| 7CEI | -222.426 | 2 |

\*\*\*\*\*

:::::::::::::

The data used to produce Fig. 3  
data/two\_best\_discriminators.txt

:::::::::::::

Ôø°

Group 06 -

"Here are all the raw scores used in for generating the final predicted  
delta G score.",,,,,,,,,,

"Normalised scores given previously correspond to converting these into z-  
scores for the complexes for which we found an empirical binding free  
energy, then finding the modulus of the normalised weighting.",,,,,,,,,,

```

,,,,,,,,,,,,
"Name ", "SD_top_ranked_under_5Armds? ", "SD_biggest_cluster? ", "NIP ", "NSC
", "fine_pair_potential ", "coarse_pair_potential ", "BS_association
", "GBSW_solvation ", "all_vdw ", "ACE_self ", "Weights for raw scores:"
"1A2K ", 0,1,0,0, -4.44, -4.57, 78.1, -28.33, -38.51, 699.41, "- 0.494 *
SD_top_ranked_under_5Armds?"
"1ACB ", 0,0,0,0, -4.46, 7.44, 16.3, -28.84, -30.66, 571.2, "- 0.060 *
SD_biggest_cluster?"
"1AHW ", 0,1,0,0, -13.29, -18.07, 53.2, -31.9, -40.72, 1222.25, "- 0.184 *
fine_pair_potential"
"1AK4 ", 0,0,0,0, -0.02, -4.15, 54.9, -18.03, -25.39, 328.53, "- 0.036 *
coarse_pair_potential"
"1AKJ ", 0,1,0,0, -10.54, -18.75, 38.9, -24.2, -34.26, 978.68, "- 0.032 * all_vdw"
"1AVX ", 0,1,0,0, -5.78, -15.79, 26.7, -32.4, -43.76, 915.41, "- 0.002 *
BS_association"
"1AY7 ", 0,1,0,0, -3.79, -3.95, 47, -21.95, -38.04, 699.07, "+ 4208.615 * NIP"
"1B6C ", 1,1,0,0, -3.4, -3.14, 93.4, -30.32, -41.64, 703.25, "- 3196.587 * NSC"
"1BGX ", 1,0,0,0, -21.97, -25.53, 26.8, -91.53, -112.52, 2542.48, "- 0.007 *
ACE_self"
"1BJ1 ", 0,1,0,0, -2.73, -4.12, 40.5, -36.77, -61.96, 763.09, "- 0.018 *
GBSW_solvation"
"1BUH ", 0,1,0,0, -4.87, -5.62, 41.5, -21.32, -29.74, 577.94,
"1BVK ", 0,1,0,0, -4.28, -10.56, 67.9, -18.01, -28.63, 660.95,
"1BVN ", 1,0,0,0, -3.6, 5.66, 14.4, -33.06, 28.66, 808.73,
"1CGI ", 1,1,0,0, -3.54, -0.2, 8.8, -41.35, -50.98, 864.26,
"1D6R ", 0,0,0,0, -3.63, -10.27, 16.7, -22.27, -31.74, 697.17,
"1DE4 ", 0,1,0,0, -7.6, -13.24, 119.2, -36.48, -38.34, 829.9,
"1DFJ ", 1,1,0,0, -15.48, -35.92, 51.7, -26.66, -2.1, 1161.94,
"1DQJ ", 0,1,0,0, -4.15, -19.63, 91.2, -29.77, -48.5, 1005.1,
"1E4K ", 0,0,0,0, -8.2, -6.28, 79.5, -18.63, -15.69, 506.78,
"1E6J ", 0,1,0,0, -1.88, -2.98, 40.4, -24.11, -26, 517.73,
1.00E+096, 0,0,0,0, -4.94, -1.36, 66.6, -23.63, -28.74, 587.41,
"1EAW ", 0,1,0,0, -5.02, -3.02, 31, -36.36, -38.91, 964.42,
"1EER ", 1,1,0,0, -22.5, -17.78, 29.4, -57.08, -57.24, 1772.36,
"1EFN ", 0,0,0,0, -3.9, -12.45, 36.8, -20.51, -28.44, 561.02,
"1EWY ", 0,0,0,0, -8.52, -11.2, 52.3, -15.27, -20.56, 696.31,
"1EZU ", 1,0,0,0, -7.63, -8.79, 15.5, -44.88, -63.79, 1069.66,
"1F34 ", 1,1,0,0, -7.69, -4.83, 4.3, -47.53, -63.28, 1283.46,
"1FC2 ", 0,1,0,0, -5.35, -4.09, 75.9, -21.04, -26.12, 475.21,
"1GCQ ", 1,1,0,0, -0.46, -1.2, 9.8, -21.57, -31.42, 480.33,
"1GHQ ", 0,0,0,0, -1.91, -2.31, 39.8, -11.04, -14.79, 301.28,
"1GLA ", 0,1,0,0, -5.02, 4.79, 144.5, -18.71, -21.81, 466.2,
"1GPW ", 1,1,0,0, -6.48, -11.83, 55.9, -30.51, -44.99, 1070.2,
"1GRN ", 1,1,0,0, -10.44, -20.2, 42.9, -36.39, -48.32, 1052.36,
"1HE8 ", 0,0,0,0, -9.2, -13.59, 169.2, -20.81, -25.06, 570.55,
"1HIA ", 1,1,0,0, -3.18, -2.1, 16.6, -31.1, -45.74, 784.04,

```



"1I2M " ,1,1,0,0,-15.49,-30.72,81.1,-42.45,-65.49,1674.68,  
"1I4D " ,0,1,0,0,-5.75,-4.11,25.8,-27.74,-31.83,616.15,  
"1IBR " ,1,1,0,0,-21.67,-40.34,47.2,-53.28,-73.07,1631.07,  
"1IJK " ,0,1,0,0,-10.84,-15.16,41.6,-25.62,-30.45,756.35,  
"1IQD " ,0,1,0,0,-8.39,-5.7,45.6,-37.98,-53.6,993.03,  
"1IRA " ,1,1,0,0,-6.23,-6.38,3.2,-43.47,-60.52,1314.86,  
"1J2J " ,0,1,0,0,-4.31,-1.06,17.9,-20.69,-22.84,322.13,  
"1JPS " ,0,1,0,0,-8.4,-17.22,45.2,-34.6,-48.1,1217.18,  
"1K5D " ,1,1,0,0,-13.39,-30.22,39.3,-45.55,-50.29,1426.55,  
"1KAC " ,0,1,0,0,-4.6,-13.96,39.9,-22.05,-25.43,699.96,  
"1KKL " ,0,1,0,0,-3.91,-1.18,97.3,-32.8,-27.46,788.52,  
"1KLU " ,0,0,0,0,-4.11,-9.45,138.7,-21.16,-30.41,604.17,  
"1KTZ " ,0,1,0,0,-3.07,-7.07,16.7,-17,-22.66,409.6,  
"1KXP " ,1,1,0,0,-14.74,-17.32,22,-52.45,-60.02,1463.78,  
"1KXQ " ,0,1,0,0,-6.51,-14.4,75.1,-34.67,-47.42,821.79,  
"1M10 " ,0,1,0,0,-16.9,-21.39,90.4,-28.51,-41.13,1158.72,  
"1MAH " ,1,1,0,0,-2.55,-1.44,70.2,-31.39,-40.74,695.75,  
"1ML0 " ,1,1,0,0,-9.2,-10.03,150,-36.04,-47.24,885.57,  
"1MLC " ,0,1,0,0,-4.86,-16.36,67.7,-23.3,11.5,741.36,  
"1N80 " ,1,1,0,0,-3.78,2.68,23.9,-36.03,-51.8,774.66,  
"1NCA " ,0,1,0,0,-7.23,-16.25,64.9,-29.63,-43.21,863.09,  
"1OPH " ,0,0,0,0,-1.41,2.93,64.3,-27.97,-27.67,639.98,  
"1PPE " ,1,1,0,0,-0.36,0.5,5.2,-33.53,-45.52,819.55,  
"1PXV " ,1,1,0,0,-9.48,-7.85,19.4,-44.3,-67.38,1163.03,  
"1QA9 " ,0,1,0,0,-17.83,-29.92,109.9,-15.57,-23.29,841.92,  
"1QFW " ,0,0,0,0,-4.02,-8.82,22.9,-21.59,-27.94,739.99,  
"1R0R " ,0,0,0,0,-2.01,-2.95,19.9,-29.04,-41.06,626.4,  
"1R8S " ,1,1,0,0,-9.91,-16.53,21.7,-51.29,-64.03,1043.63,  
"1RLB " ,0,0,0,0,-4.49,-1.19,69.3,-17.87,-22.34,484.09,  
"1S1Q " ,0,0,0,0,-3.86,4.33,25.9,-19.22,-28.15,478.36,  
"1SBB " ,0,0,0,0,-4.17,-10.74,59.3,-15.86,-22.45,470.85,  
"1T6B " ,1,1,0,0,-6.43,-11.61,110.1,-27.98,-36.4,862.33,  
"1VFB " ,0,1,0,0,-3.49,-9.49,41.2,-20.43,-36.41,770.36,  
"1WEJ " ,0,1,0,0,-8.09,-12.76,184.2,-23.58,-36.44,927.12,  
"1WQ1 " ,1,1,0,0,-7.9,-21.38,19.4,-42.35,-56.65,1443.34,  
"1XD3 " ,1,1,0,0,-8.27,-9.47,24.7,-43.66,-57.97,1031.61,  
"1XQS " ,1,1,0,0,-21.05,-25.84,48,-36.89,-55,1497.47,  
"1Y64 " ,0,1,0,0,-9.48,-17.28,2.4,-24.17,-22.36,763.17,  
"1Z0K " ,1,1,0,0,-3.79,1.43,17.4,-30.72,-39.46,865.46,  
"1ZHI " ,0,0,0,0,-6.66,-1.17,87.9,-18.9,-28.11,566.85,  
"2AJF " ,0,1,0,0,-8.45,-11.35,70.6,-19,-29.07,611.08,  
"2B42 " ,1,1,0,0,-4.57,-24.18,10,-38.73,-59.11,1220.68,  
"2C0L " ,0,0,0,0,-6.06,-3.44,69.3,-34.91,-42.02,826.88,  
"2FD6 " ,0,0,0,0,-1.06,-11.9,106.6,-18.04,-32.73,503.96,  
"2HLE " ,0,1,0,0,-7.72,-6.93,19.9,-36.29,-48.98,1126.75,  
"2HQ5 " ,1,1,0,0,-7.9,-9.12,12.4,-37.05,-50.15,1146.82,

"2HRK ",0,1,0,0,-2.26,1.44,18.7,-25.72,-29.15,504.04,  
"2I25 ",0,0,0,0,-12.3,-5.38,26.9,-27.44,-45.74,867.76,  
"2JEL ",0,0,0,0,-4.12,-13.41,75.9,-25.25,-34.72,807.92,  
"2MTA ",0,1,0,0,-3.07,1.5,89.7,-17.79,-21.38,380.44,  
"208V ",0,1,0,0,-1.92,-5.49,76,-28.6,-37.63,576.42,  
"200B ",0,0,0,0,-0.83,5.05,5.2,-16.88,-20.46,241.1,  
"20T3 ",0,1,0,0,-3.07,1.76,16.3,-46.35,-53.89,992.21,  
"2PCC ",0,0,0,0,-8.55,-11.57,140.7,-14.53,-14.93,532.09,  
"2QFW ",0,0,0,0,-2.67,-7.38,27.3,-17.63,-25.28,567.69,  
"2SIC ",0,0,0,0,-1.72,-5.43,29.4,-28.81,-35.19,619.38,  
"2SNI ",0,0,0,0,-3.73,-0.09,30.9,-31.21,-43.55,691.24,  
"2UUY ",0,0,0,0,-1.2,-3.39,16.8,-30.34,-44.68,839.23,  
"2VIS ",0,0,0,0,-1.56,-3.97,35,-20.16,-24.15,473.94,  
"7CEI ",1,1,0,0,-10.75,-18.8,128.8,-24.7,-36.51,971.61,  
"1AZS ",0,1,0,0,-9.01,-4.2,41.7,-28.41,-42.24,592.87,  
"1BKD ",1,1,0,0,-16.09,-25.57,26.5,-49.38,-64.04,1360.91,  
"1F51 ",1,1,0,0,-10.23,-0.82,43.7,-35.39,-36.49,927.6,  
"1FAK ",1,0,0,0,-20.89,-15.8,35.1,-41.86,-53.96,1451.39,  
"1FQ1 ",0,1,0,0,-8.81,-18.07,74.7,-21.37,-27.27,666.75,  
"1FQJ ",0,0,0,0,-13.15,-14,39.4,-30.57,-28.17,1121.79,  
"1FSK ",0,1,0,0,-7.08,-11.93,96.2,-27.42,-48.73,913.17,  
"1GP2 ",1,1,0,0,-13.56,-16.72,75.4,-34.25,-45.11,1012.08,  
"1H1V ",0,1,0,0,-4.6,-10.28,103.6,-32.35,-37.03,739.1,  
"1HE1 ",1,1,0,0,-4.6,-8.88,19.4,-36.72,-48.25,951.11,  
"1I9R ",0,0,0,0,-5.52,-9.67,86.4,-21.95,-27.12,734.98,  
"1IB1 ",0,0,0,0,-19.48,-3.13,17.7,-45.09,-54.2,1273.22,  
"1JMO ",1,1,0,0,-10.56,-26.44,35.1,-60.55,-81.32,1494.69,  
"1K4C ",0,0,0,0,-3.58,-7.42,35.5,-28,-46.91,763.61,  
"1K74 ",1,1,0,0,-13.98,-16.92,85.1,-31.8,-18.57,1022.8,  
"1N2C ",1,1,0,0,-24.12,-22.94,63.8,-60.48,24.46,1140.59,  
"1NSN ",0,1,0,0,-9.85,-12.16,74.6,-24.74,-13.68,832.35,  
"1NW9 ",1,1,0,0,-5.32,1.41,34,-37.5,-53.6,750.42,  
"1UDI ",1,1,0,0,-6.07,-3.98,33.8,-31.34,-36.99,719.52,  
"1YVB ",0,1,0,0,-2.73,5.56,23.2,-26.27,-31.55,556.82,  
"1Z5Y ",0,1,0,0,-4.24,-9.55,24.6,-20.12,-18.28,535.31,  
"2CFH ",1,1,0,0,-11.06,-7.38,61.9,-50.65,-50.13,1009.81,  
"2H7V ",0,1,0,0,-4,-6.38,20.7,-24.89,-29.95,624.82,  
"2HMI ",0,1,0,0,-0.86,-4.22,179.6,-16.03,-17.86,301.14,  
"2NZ8 ",1,1,0,0,-5.4,-9.07,18.2,-43.46,-52.44,1129.48,  
"1D01 ",0,0,0,0,-3.89,-1.7,8.4,-18.31,-26.17,441.35,  
"1D02 ",0,0,0,0,-6.35,-5.57,44.6,-17.79,-20.93,450.95,  
"1D03 ",0,0,0,0,-4.69,-8.75,29.2,-25.53,-41.84,687.06,  
"1D04 ",0,1,0,0,-6.36,-2.67,18.6,-18.12,-19.88,500.02,  
"1D05 ",0,0,0,0,-4.81,-2.73,11.2,-19.18,39.84,452.84,  
"1D06 ",0,0,0,0,-6.76,-1.9,53.6,-20.71,-28.46,480.64,  
"1D07 ",0,0,0,0,-11.37,-10.42,10.8,-21.19,-28.86,625.39,

"1D08 " ,0,0,0,0,-2.04,0.81,15.5,-22.11,-24.6,460.38,  
"1D09 " ,0,0,0,0,-4.76,-2.1,14,-16.54,-22.77,351.5,  
"1D10 " ,0,1,0,0,-4.03,-2.73,16.3,-18.11,-23.58,345.23,  
"1D11 " ,0,0,0,0,-7.89,-1.87,13.5,-16.42,-23.6,462.01,  
"1D12 " ,0,1,0,0,-3.38,-5.33,40.4,-26.15,-32.01,509.82,  
"1D13 " ,0,0,0,0,-4.82,-7.61,24.6,-17.97,-27.82,541.67,  
"1D14 " ,0,0,0,0,-0.31,-0.81,14.4,-17.17,-20.52,302.22,  
"1D15 " ,0,1,0,0,-4.15,-0.07,21.8,-20.94,-25.94,558.59,  
"1D16 " ,0,0,0,0,-4.84,-5.13,39.6,-21.35,-31.54,533.69,  
"1D17 " ,0,0,0,0,-5.93,-5.26,39,-17.26,-28.2,428.32,  
"1D18 " ,0,0,0,0,-8.29,-0.3,35.1,-16.65,-25.89,483.61,  
"1D19 " ,0,0,0,0,-4,-2.74,55.4,-24.08,-24.37,558.37,  
"1D20 " ,0,1,0,0,-10.65,0.68,37,-33.04,-27.29,759.61,  
"1D21 " ,0,0,0,0,-4.29,-2.72,11.9,-19.93,-15.41,378.19,  
"1D22 " ,0,0,0,0,-3.06,-2.46,24,-21.02,-23.05,441.62,  
"1D23 " ,0,1,0,0,-3.4,-3.12,25.9,-19.43,-32.59,364.09,  
"1D24 " ,0,1,0,0,-5.15,1.58,21.5,-24.93,-16.07,580.22,  
"1D25 " ,0,0,0,0,-7.12,-4.2,36.3,-13.82,-20.22,388.82,  
"1D26 " ,0,0,0,0,-9.75,-8.47,25,-15.43,-1.81,476.16,  
"1D27 " ,0,0,0,0,-4.24,2.41,20.3,-17.14,-29.73,432.12,  
"1D28 " ,0,0,0,0,-3.55,-0.51,14.7,-17.42,-23.59,456.86,  
"1D29 " ,0,0,0,0,-7.18,-4.08,30.9,-21.72,-28.35,558.53,  
"1D30 " ,0,1,0,0,-6.4,-7.73,16.3,-24.33,-34.93,572.58,  
"1D31 " ,0,0,0,0,-1.46,-3.32,10.4,-16.35,-25.5,396.09,  
"1D32 " ,0,0,0,0,-1.74,5.99,9.1,-12.76,-20.02,274.02,  
"1D33 " ,0,1,0,0,-4.16,-1.87,35.7,-26.97,-36.36,560.67,  
"1D34 " ,0,0,0,0,-3.83,-0.74,17.8,-23.91,-38.01,555.81,  
"1D35 " ,0,1,0,0,-5.93,-9.25,25,-23.36,-38.25,587.62,  
"1D36 " ,0,0,0,0,-3.12,-8.6,21.5,-21.26,-25.14,432.04,  
"1D37 " ,0,0,0,0,-3.36,-3.57,63.6,-26.85,-29.25,539.79,  
"1D38 " ,1,0,0,0,-6.65,-1.6,49.4,-27.61,-30.96,538.58,  
"1D39 " ,0,0,0,0,-4.3,-8.29,24.1,-14.9,-24.02,403.64,  
"1D40 " ,0,0,0,0,-3.69,-3.7,51.9,-16.45,-26.38,473.2,  
"1D41 " ,0,0,0,0,-5.58,-8.17,46,-18.32,-23.72,414.74,  
"1D42 " ,0,0,0,0,-7.46,-2.6,33.1,-21.63,-23.95,503.98,  
"1D43 " ,0,0,0,0,-7.67,-5.79,31.3,-21.6,-28.05,466.09,  
"1D44 " ,0,0,0,0,-3.16,-2.61,28.8,-23.52,-37.07,535.06,  
"1D45 " ,0,1,0,0,-4.6,-0.52,13.5,-25.45,-34.14,517.22,  
"1D46 " ,0,0,0,0,-4.17,-1.55,18.3,-14.78,-26.49,409.62,  
"1D47 " ,0,0,0,0,-5.9,0.83,69.6,-20.69,-28.42,450.4,  
"1D48 " ,0,0,0,0,-3.12,-3.79,25.3,-22.66,-30.44,408.78,  
"1D49 " ,0,0,0,0,-0.86,0.37,56.5,-14.96,-28.46,228.61,  
"1D50 " ,0,0,0,0,-5.42,-1.05,52.2,-21.17,-26.41,429.58,  
"1D51 " ,0,0,0,0,-1.62,0.89,110.4,-18.28,-28.64,434.61,  
"1D52 " ,0,1,0,0,-10.78,-10.37,37.6,-26.23,-32.8,653.43,  
"1D53 " ,0,1,0,0,-10.65,-18.62,56,-23.09,-28.43,579.65,

"1D54 " ,0,0,0,0,-3.76,-3.03,24.5,-18.46,-28.47,419.8,  
 "1D55 " ,0,1,0,0,-2.52,-2.8,16.2,-19.87,-11.53,366.13,  
 "1D56 " ,0,0,0,0,-3.03,-0.12,29.4,-20.13,-27.74,406.46,  
 "1D57 " ,0,0,0,0,-5.98,-7.89,53.7,-22.8,-32.03,646.11,  
 "1D58 " ,0,0,0,0,-5.13,-5.89,24.3,-25.21,-29.87,529.65,  
 "1D59 " ,0,1,0,0,-5.61,-5,27.8,-19.47,-30.6,523.45,  
 "1D60 " ,0,0,0,0,-2.91,-3.55,17.8,-15.86,-23.88,377.5,  
 "1D61 " ,0,0,0,0,-6.44,-10.26,22.2,-25.19,-33.66,585.53,  
 "1D62 " ,0,1,0,0,-4.33,1.15,20.2,-23.27,-32.63,512.87,  
 "1D63 " ,0,0,0,0,-4.67,-4.24,28.9,-19.7,-27.38,514.03,  
 "1D64 " ,0,0,0,0,-4.64,1.26,21.8,-16.45,-21.26,373.06,  
 "1D65 " ,0,0,0,0,-13,-12.78,15.1,-18.71,-26.94,565.4,  
 "1D66 " ,0,0,0,0,-5.2,3.13,22.7,-22.45,-25.02,367.63,  
 "1D67 " ,0,0,0,0,-5.56,-6.09,16.7,-20.9,-28.66,512.54,  
 "1D68 " ,0,1,0,0,-4.08,4.32,45.5,-21.13,-22.11,474.73,  
 "1D69 " ,0,0,0,0,-9.65,-3.89,21.4,-21.26,-24.51,496.87,  
 "1D70 " ,0,0,0,0,-2.47,-5.12,16,-19.2,-28.76,442.03,  
 "1D71 " ,0,1,0,0,-3.69,-1.75,18.3,-25.49,-24.6,519.2,  
 "1D72 " ,0,0,0,0,-9.8,-5.25,16,-24.67,-34.44,675.61,  
 "1D73 " ,0,0,0,0,-3.66,-2.77,37.7,-14.9,-23.76,392.77,  
 "1D74 " ,0,0,0,0,-2.84,-2.72,28.1,-14.12,-23.95,310.24,  
 "1D75 " ,0,0,0,0,-1.11,2.59,21.9,-17.92,-22.98,405.59,  
 "1D76 " ,0,0,0,0,-7.39,-5.96,32.1,-27.23,-32.6,623.33,  
 "1D77 " ,0,0,0,0,-7.42,-1.62,7.2,-22.56,-29.54,574.91,  
 "1D78 " ,0,0,0,0,-2.92,1.31,24.6,-16.44,-24.99,362.38,  
 "1D79 " ,0,0,0,0,-6.41,-9.7,26.5,-15.8,-21.23,449.62,  
 "1D80 " ,0,0,0,0,-3.48,-10.96,24.9,-16.6,-23.94,365.2,  
 "1D81 " ,0,0,0,0,-7.58,-9.9,29.03,-23.47,-33.95,633.08,  
 "1D82 " ,0,1,0,0,-3.16,2.56,29.03,-27,-30.79,503.43,  
 "1D83 " ,0,1,0,0,-6.38,1.43,29.03,-31.77,-40.44,603.27,  
 "1D84 " ,0,0,0,0,-5.77,-0.99,29.03,-24.27,-25.35,590.93,  
 "1D85 " ,0,0,0,0,-6.07,-0.23,29.03,-21.49,-30.82,457.79,  
 "1D86 " ,0,0,0,0,-3.27,-4.61,29.03,-16.82,-21.88,335.66,  
 "1D87 " ,0,0,0,0,-4.27,-0.27,29.03,-21.16,-29.74,436.4,

REMARK Top two discriminators for group 6, Iain H. Moal, Xiaofan Li and Paul A. Bates.

Units for ACE\_self: kcal/mol

Units for Rosetta\_fine: REU

| Ace_self | Rosetta_fine |           |
|----------|--------------|-----------|
| design_1 | 441.35221    | -3.890000 |
| design_2 | 450.95477    | -6.351000 |
| design_3 | 687.06172    | -4.689000 |
| design_4 | 500.02184    | -6.364000 |

|           |           |            |
|-----------|-----------|------------|
| design_5  | 452.84427 | -4.810000  |
| design_6  | 480.63589 | -6.762000  |
| design_7  | 625.39191 | -11.370000 |
| design_8  | 460.37543 | -2.035000  |
| design_9  | 351.49874 | -4.763000  |
| design_10 | 345.23206 | -4.033000  |
| design_11 | 462.00974 | -7.889000  |
| design_12 | 509.81702 | -3.377000  |
| design_13 | 541.66852 | -4.824000  |
| design_14 | 302.21809 | -0.306000  |
| design_15 | 558.58957 | -4.154000  |
| design_16 | 533.68756 | -4.838000  |
| design_17 | 428.32468 | -5.930000  |
| design_18 | 483.6136  | -8.293000  |
| design_19 | 558.36724 | -3.995000  |
| design_20 | 759.61015 | -10.646000 |
| design_21 | 378.1947  | -4.290000  |
| design_22 | 441.61667 | -3.061000  |
| design_23 | 364.08877 | -3.402000  |
| design_24 | 580.22214 | -5.148000  |
| design_25 | 388.82013 | -7.116000  |
| design_26 | 476.16206 | -9.753000  |
| design_27 | 432.12012 | -4.237000  |
| design_28 | 456.86103 | -3.551000  |
| design_29 | 558.52622 | -7.176000  |
| design_30 | 572.58354 | -6.403000  |
| design_31 | 396.08788 | -1.463000  |
| design_32 | 274.01709 | -1.739000  |
| design_33 | 560.66567 | -4.161000  |
| design_34 | 555.81453 | -3.830000  |
| design_35 | 587.6179  | -5.931000  |
| design_36 | 432.04206 | -3.120000  |
| design_37 | 539.79162 | -3.355000  |
| design_38 | 538.57983 | -6.649000  |
| design_39 | 403.63856 | -4.297000  |
| design_40 | 473.19782 | -3.690000  |
| design_41 | 414.74018 | -5.582000  |
| design_42 | 503.97733 | -7.457000  |
| design_43 | 466.08804 | -7.665000  |
| design_44 | 535.05564 | -3.159000  |
| design_45 | 517.22237 | -4.599000  |
| design_46 | 409.62412 | -4.173000  |
| design_47 | 450.39902 | -5.899000  |
| design_48 | 408.77631 | -3.116000  |
| design_49 | 228.60946 | -0.862000  |
| design_50 | 429.58165 | -5.416000  |

|           |            |            |
|-----------|------------|------------|
| design_51 | 434.60648  | -1.618000  |
| design_52 | 653.43299  | -10.778000 |
| design_53 | 579.65271  | -10.645000 |
| design_54 | 419.79665  | -3.759000  |
| design_55 | 366.12935  | -2.517000  |
| design_56 | 406.46393  | -3.030000  |
| design_57 | 646.10996  | -5.982000  |
| design_58 | 529.647    | -5.131000  |
| design_59 | 523.44885  | -5.606000  |
| design_60 | 377.49847  | -2.905000  |
| design_61 | 585.53069  | -6.444000  |
| design_62 | 512.87029  | -4.331000  |
| design_63 | 514.02865  | -4.672000  |
| design_64 | 373.06198  | -4.639000  |
| design_65 | 565.40046  | -13.003000 |
| design_66 | 367.63007  | -5.204000  |
| design_67 | 512.53812  | -5.563000  |
| design_68 | 474.73063  | -4.079000  |
| design_69 | 496.86781  | -9.654000  |
| design_70 | 442.02704  | -2.474000  |
| design_71 | 519.19557  | -3.694000  |
| design_72 | 675.61356  | -9.800000  |
| design_73 | 392.77039  | -3.661000  |
| design_74 | 310.23785  | -2.836000  |
| design_75 | 405.58872  | -1.113000  |
| design_76 | 623.33211  | -7.393000  |
| design_77 | 574.90942  | -7.422000  |
| design_78 | 362.38031  | -2.924000  |
| design_79 | 449.61552  | -6.409000  |
| design_80 | 365.20313  | -3.484000  |
| design_81 | 633.08277  | -7.576000  |
| design_82 | 503.43224  | -3.156000  |
| design_83 | 603.26757  | -6.375000  |
| design_84 | 590.93379  | -5.766000  |
| design_85 | 457.78971  | -6.068000  |
| design_86 | 335.65669  | -3.273000  |
| design_87 | 436.39842  | -4.273000  |
| 1A2K      | 699.40758  | -4.442000  |
| 1ACB      | 571.19633  | -4.459000  |
| 1AHW      | 1222.24834 | -13.286000 |
| 1AK4      | 328.53187  | -0.019000  |
| 1AKJ      | 978.6798   | -10.538000 |
| 1AVX      | 915.41087  | -5.783000  |
| 1AY7      | 699.06927  | -3.789000  |
| 1AZS      | 592.87483  | -9.010000  |
| 1B6C      | 703.24898  | -3.403000  |

|      |            |            |
|------|------------|------------|
| 1BGX | 2542.48221 | -21.970000 |
| 1BJ1 | 763.09447  | -2.727000  |
| 1BKD | 1360.91439 | -16.087000 |
| 1BUH | 577.93506  | -4.870000  |
| 1BVK | 660.94561  | -4.276000  |
| 1BVN | 808.73265  | -3.598000  |
| 1CGI | 864.26354  | -3.541000  |
| 1D6R | 697.16586  | -3.630000  |
| 1DE4 | 829.90182  | -7.598000  |
| 1DFJ | 1161.93587 | -15.477000 |
| 1DQJ | 1005.10199 | -4.153000  |
| 1E4K | 506.77611  | -8.199000  |
| 1E6J | 517.73289  | -1.880000  |
| 1E96 | 587.40504  | -4.942000  |
| 1EAW | 964.42454  | -5.023000  |
| 1EER | 1772.35574 | -22.498000 |
| 1EFN | 561.02136  | -3.898000  |
| 1EWY | 696.30784  | -8.521000  |
| 1EZU | 1069.66445 | -7.634000  |
| 1F34 | 1283.45678 | -7.694000  |
| 1F51 | 927.60028  | -10.225000 |
| 1FAK | 1451.3894  | -20.886000 |
| 1FC2 | 475.20581  | -5.352000  |
| 1FQ1 | 666.7464   | -8.812000  |
| 1FQJ | 1121.79303 | -13.149000 |
| 1FSK | 913.16991  | -7.083000  |
| 1GCQ | 480.33133  | -0.463000  |
| 1GHQ | 301.27524  | -1.913000  |
| 1GLA | 466.19906  | -5.015000  |
| 1GP2 | 1012.08262 | -13.558000 |
| 1GPW | 1070.19891 | -6.475000  |
| 1GRN | 1052.35851 | -10.435000 |
| 1H1V | 739.09834  | -4.598000  |
| 1HE1 | 951.11292  | -4.604000  |
| 1HE8 | 570.54844  | -9.197000  |
| 1HIA | 784.03553  | -3.177000  |
| 1I2M | 1674.67612 | -15.485000 |
| 1I4D | 616.14671  | -5.753000  |
| 1I9R | 734.9849   | -5.519000  |
| 1IB1 | 1273.21739 | -19.484000 |
| 1IBR | 1631.06512 | -21.671000 |
| 1IJK | 756.35282  | -10.836000 |
| 1IQD | 993.03027  | -8.389000  |
| 1IRA | 1314.85765 | -6.227000  |
| 1J2J | 322.13265  | -4.311000  |
| 1JMO | 1494.69091 | -10.559000 |

|      |            |            |
|------|------------|------------|
| 1JPS | 1217.17984 | -8.402000  |
| 1K4C | 763.61243  | -3.583000  |
| 1K5D | 1426.54802 | -13.387000 |
| 1K74 | 1022.80258 | -13.979000 |
| 1KAC | 699.96152  | -4.601000  |
| 1KKL | 788.51979  | -3.914000  |
| 1KLU | 604.16541  | -4.107000  |
| 1KTZ | 409.59829  | -3.071000  |
| 1KXP | 1463.78078 | -14.738000 |
| 1KXQ | 821.79181  | -6.513000  |
| 1M10 | 1158.71871 | -16.904000 |
| 1MAH | 695.74727  | -2.546000  |
| 1ML0 | 885.57276  | -9.202000  |
| 1MLC | 741.35715  | -4.856000  |
| 1N2C | 1140.58958 | -24.121000 |
| 1N80 | 774.65594  | -3.783000  |
| 1NCA | 863.09222  | -7.231000  |
| 1NSN | 832.34604  | -9.851000  |
| 1NW9 | 750.42132  | -5.320000  |
| 1OPH | 639.98134  | -1.406000  |
| 1PPE | 819.55235  | -0.361000  |
| 1PXV | 1163.02675 | -9.484000  |
| 1QA9 | 841.92318  | -17.834000 |
| 1QFW | 739.98754  | -4.022000  |
| 1R0R | 626.39716  | -2.008000  |
| 1R8S | 1043.62688 | -9.912000  |
| 1RLB | 484.08506  | -4.490000  |
| 1S1Q | 478.35655  | -3.863000  |
| 1SBB | 470.84781  | -4.166000  |
| 1T6B | 862.33194  | -6.426000  |
| 1UDI | 719.52091  | -6.067000  |
| 1VFB | 770.36234  | -3.489000  |
| 1WEJ | 927.11812  | -8.094000  |
| 1WQ1 | 1443.33874 | -7.900000  |
| 1XD3 | 1031.60787 | -8.272000  |
| 1XQS | 1497.46828 | -21.049000 |
| 1Y64 | 763.16749  | -9.481000  |
| 1YVB | 556.82453  | -2.731000  |
| 1Z0K | 865.46251  | -3.793000  |
| 1Z5Y | 535.31189  | -4.237000  |
| 1ZHI | 566.84629  | -6.664000  |
| 2AJF | 611.07684  | -8.445000  |
| 2B42 | 1220.67969 | -4.570000  |
| 2C0L | 826.88422  | -6.060000  |
| 2CFH | 1009.80655 | -11.055000 |
| 2FD6 | 503.96202  | -1.056000  |



|      |            |            |
|------|------------|------------|
| 2H7V | 624.82199  | -3.997000  |
| 2HLE | 1126.74661 | -7.719000  |
| 2HMI | 301.13977  | -0.862000  |
| 2HQS | 1146.81692 | -7.901000  |
| 2HRK | 504.04066  | -2.255000  |
| 2I25 | 867.75525  | -12.304000 |
| 2JEL | 807.92144  | -4.118000  |
| 2MTA | 380.43792  | -3.071000  |
| 2NZ8 | 1129.48204 | -5.402000  |
| 2O8V | 576.41564  | -1.921000  |
| 2O0B | 241.09823  | -0.833000  |
| 2OT3 | 992.2117   | -3.065000  |
| 2PCC | 532.09434  | -8.554000  |
| 2QFW | 567.68557  | -2.671000  |
| 2SIC | 619.37596  | -1.716000  |
| 2SNI | 691.24416  | -3.726000  |
| 2UUY | 839.2346   | -1.197000  |
| 2VIS | 473.93992  | -1.562000  |
| 7CEI | 971.609    | -10.751000 |

\*\*\*\*\*

\*\*\*

Group 05

REMARK Please use this file to submit your results for both designs and  
REMARK the ZDock benchmark.

REMARK Change the file name from GroupXXX.txt to represent your group's  
number.

REMARK Change 'Column1' and 'Column2' below to the first- and second-most  
REMARK important parameters in your score function

REMARK Specify the units for each column below:

Units for Column1:Z-score of Atom-atom contact potential

Units for Column2:Raw energy score of Atom-atom contact potential

| Column1 | Column2 | Column2 |
|---------|---------|---------|
| 1A2K    | 4.958   | 5.333   |
| 1ACB    | 5.213   | 4.558   |
| 1AHW    | 4.541   | 4.836   |
| 1AK4    | 4.081   | 2.978   |
| 1AKJ    | 3.431   | 3.171   |
| 1AVX    | 4.811   | 5.180   |
| 1AY7    | 3.356   | 2.964   |
| 1AZS    | 3.412   | 3.945   |
| 1B6C    | 4.625   | 5.799   |
| 1BGX    | 6.778   | 12.632  |

|      |        |       |
|------|--------|-------|
| 1BJ1 | 3.900  | 3.716 |
| 1BKD | 6.343  | 7.264 |
| 1BUH | 2.962  | 3.177 |
| 1BVK | 2.320  | 2.830 |
| 1BVN | 5.423  | 5.498 |
| 1CGI | 4.525  | 5.098 |
| 1D6R | 1.100  | 1.788 |
| 1DE4 |        |       |
| 1DFJ | 3.702  | 3.465 |
| 1DQJ | 4.910  | 4.870 |
| 1E4K | 2.494  | 2.737 |
| 1E6J | 4.655  | 4.384 |
| 1E96 | 2.290  | 2.784 |
| 1EAW | 2.823  | 3.608 |
| 1EER | 6.672  | 9.258 |
| 1EFN | 3.538  | 3.668 |
| 1EWY | 1.989  | 2.258 |
| 1EZU | 5.288  | 4.852 |
| 1F34 | 5.466  | 5.930 |
| 1F51 | 4.728  | 4.337 |
| 1FAK | 6.095  | 5.752 |
| 1FC2 | 3.840  | 3.043 |
| 1FQ1 | 3.308  | 3.229 |
| 1FQJ | 1.595  | 2.121 |
| 1FSK | 5.042  | 5.533 |
| 1GCQ | 3.826  | 3.334 |
| 1GHQ | -0.279 | 1.530 |
| 1GLA | 3.014  | 3.039 |
| 1GP2 | 4.036  | 3.852 |
| 1GPW | 3.972  | 3.764 |
| 1GRN | 5.748  | 6.587 |
| 1H1V | 4.782  | 4.672 |
| 1HE1 | 5.359  | 6.015 |
| 1HE8 | 2.542  | 2.475 |
| 1HIA | 3.153  | 2.796 |
| 1I2M | 6.383  | 6.632 |
| 1I4D | 3.261  | 4.237 |
| 1I9R | 1.526  | 2.346 |
| 1IB1 | 5.013  | 5.310 |
| 1IBR | 5.980  | 7.829 |
| 1IJK | 4.880  | 4.441 |
| 1IQD | 6.625  | 7.444 |
| 1IRA | 6.263  | 6.032 |
| 1J2J | 3.682  | 4.590 |
| 1JMO | 6.118  | 8.404 |
| 1JPS | 5.054  | 4.355 |

|      |       |        |
|------|-------|--------|
| 1K4C | 3.985 | 4.426  |
| 1K5D | 4.758 | 6.539  |
| 1K74 | 5.496 | 5.414  |
| 1KAC | 4.126 | 3.294  |
| 1KKL | 2.860 | 3.132  |
| 1KLU | 2.860 | 2.845  |
| 1KTZ | 0.971 | 1.970  |
| 1KXP | 6.098 | 8.379  |
| 1KXQ | 6.225 | 5.200  |
| 1M10 | 4.323 | 3.702  |
| 1MAH | 4.412 | 4.568  |
| 1ML0 | 4.255 | 5.303  |
| 1MLC | 4.703 | 4.020  |
| 1N2C | 6.272 | 9.143  |
| 1N80 | 3.478 | 3.365  |
| 1NCA | 3.751 | 3.767  |
| 1NSN | 3.516 | 3.043  |
| 1NW9 | 3.459 | 5.634  |
| 1OPH | 3.423 | 3.575  |
| 1PPE | 3.942 | 4.374  |
| 1PXV | 5.159 | 6.279  |
| 1QA9 | 1.813 | 1.848  |
| 1QFW | 3.231 | 4.083  |
| 1R0R | 4.690 | 4.709  |
| 1R8S | 5.895 | 7.698  |
| 1RLB | 2.274 | 2.552  |
| 1S1Q | 2.420 | 2.505  |
| 1SBB | 1.540 | 2.204  |
| 1T6B | 5.510 | 5.621  |
| 1UDI | 4.711 | 4.970  |
| 1VFB | 3.405 | 3.165  |
| 1WEJ | 3.905 | 2.768  |
| 1WQ1 | 4.629 | 6.011  |
| 1XD3 | 6.122 | 7.440  |
| 1XQS | 4.343 | 4.758  |
| 1Y64 | 2.086 | 2.779  |
| 1YVB | 4.179 | 4.427  |
| 1Z0K | 5.462 | 5.703  |
| 1Z5Y | 4.093 | 4.148  |
| 1ZHI | 2.495 | 2.661  |
| 2AJF | 4.587 | 4.222  |
| 2B42 | 5.636 | 6.962  |
| 2C0L | 6.465 | 5.297  |
| 2CFH | 5.631 | 11.846 |
| 2FD6 | 2.472 | 2.731  |
| 2H7V | 5.005 | 5.000  |

|           |        |       |
|-----------|--------|-------|
| 2HLE      | 4.029  | 4.442 |
| 2HMI      |        |       |
| 2HQS      | 4.863  | 4.753 |
| 2HRK      | 3.805  | 4.882 |
| 2I25      | 4.328  | 3.871 |
| 2JEL      | 1.963  | 2.410 |
| 2MTA      | 1.817  | 2.278 |
| 2NZ8      | 4.697  | 5.640 |
| 2O8V      | 4.074  | 3.642 |
| 2O0B      | 1.112  | 1.832 |
| 2OT3      | 6.061  | 6.973 |
| 2PCC      | 1.679  | 1.821 |
| 2QFW      | 2.828  | 4.233 |
| 2SIC      | 2.217  | 2.804 |
| 2SNI      | 5.063  | 4.798 |
| 2UUY      | 2.609  | 3.190 |
| 2VIS      | 3.199  | 3.451 |
| 7CEI      | 6.004  | 3.672 |
| design_1  | 1.789  | 2.855 |
| design_10 | 2.418  | 3.134 |
| design_11 | 1.649  | 2.443 |
| design_12 | 3.078  | 3.691 |
| design_13 | 1.482  | 2.471 |
| design_14 | 0.502  | 1.773 |
| design_15 | 2.937  | 3.323 |
| design_16 | 1.593  | 2.416 |
| design_17 | 0.527  | 2.037 |
| design_18 | 1.782  | 2.197 |
| design_19 | 3.362  | 4.166 |
| design_2  | 1.914  | 2.324 |
| design_20 | 4.460  | 5.807 |
| design_21 | 2.845  | 3.238 |
| design_22 | 5.558  | 4.882 |
| design_23 | 0.843  | 1.632 |
| design_24 | 5.216  | 4.404 |
| design_25 | 1.010  | 2.135 |
| design_26 | 0.119  | 1.460 |
| design_27 | 1.635  | 2.628 |
| design_28 | 2.254  | 2.607 |
| design_29 | 2.353  | 3.686 |
| design_3  | 2.367  | 2.427 |
| design_30 | 2.650  | 2.797 |
| design_31 | 0.492  | 1.909 |
| design_32 | -0.539 | 1.309 |
| design_33 | 3.391  | 4.094 |
| design_34 | 2.674  | 2.746 |

|           |        |       |
|-----------|--------|-------|
| design_35 | 2.632  | 2.933 |
| design_36 | 2.195  | 2.637 |
| design_37 | 4.719  | 4.547 |
| design_38 | 4.285  | 6.159 |
| design_39 | 1.023  | 2.035 |
| design_4  | 1.489  | 2.443 |
| design_40 | 1.520  | 2.430 |
| design_41 | 2.040  | 2.541 |
| design_42 | 0.927  | 2.454 |
| design_43 | 1.867  | 2.456 |
| design_44 | 3.287  | 2.928 |
| design_45 | 2.754  | 4.090 |
| design_46 | 1.849  | 2.097 |
| design_47 | 2.157  | 2.606 |
| design_48 | 2.663  | 3.521 |
| design_49 | 2.055  | 2.195 |
| design_5  | 0.983  | 2.108 |
| design_50 | 1.062  | 2.043 |
| design_51 | 1.757  | 2.428 |
| design_52 | 3.048  | 3.301 |
| design_53 | 1.900  | 2.618 |
| design_54 | 0.174  | 1.608 |
| design_55 | 4.509  | 4.454 |
| design_56 | 1.494  | 2.467 |
| design_57 | 1.498  | 2.044 |
| design_58 | 1.928  | 2.831 |
| design_59 | 0.857  | 1.883 |
| design_6  | 5.277  | 4.184 |
| design_60 | 0.342  | 1.703 |
| design_61 | 1.723  | 3.060 |
| design_62 | 1.769  | 4.517 |
| design_63 | 2.672  | 3.363 |
| design_64 | 1.332  | 2.220 |
| design_65 | 1.509  | 2.307 |
| design_66 | 4.178  | 4.179 |
| design_67 | 1.767  | 2.295 |
| design_68 | 3.958  | 2.897 |
| design_69 | 1.230  | 2.221 |
| design_7  | 1.621  | 2.612 |
| design_70 | 1.002  | 2.026 |
| design_71 | 4.417  | 5.240 |
| design_72 | 2.472  | 2.813 |
| design_73 | 1.140  | 2.079 |
| design_74 | -0.789 | 2.001 |
| design_75 | 4.101  | 3.593 |
| design_76 |        |       |

|           |       |       |
|-----------|-------|-------|
| design_77 | 3.115 | 3.306 |
| design_78 | 1.297 | 2.467 |
| design_79 | 0.303 | 1.625 |
| design_8  | 3.577 | 3.869 |
| design_80 | 0.842 | 1.939 |
| design_81 | 2.026 | 2.964 |
| design_82 | 4.704 | 4.543 |
| design_83 | 3.047 | 5.879 |
| design_84 | 4.070 | 3.814 |
| design_85 | 3.140 | 3.491 |
| design_86 | 1.662 | 2.449 |
| design_87 | 1.207 | 1.984 |
| design_9  | 1.656 | 2.458 |

\*\*\*\*\*

REMARK Group35\_top\_two\_discriminators.txt  
REMARK Specify the units for each column below:

Units for Column1: Raw score HbondEnergy/deltaGbinding ratio (Unitless  
Energy/Energy cancels out)

Units for Column2: Raw score BurriedUnsatisfiedH-bonds/InterfaceBurriedSASA  
(number/Angstrom^2)

| struc    | Column1 | Column2 |
|----------|---------|---------|
| 1A2K.pdb | 0.404   | 0.0032  |
| 1ACB.pdb | 0.235   | 0.0052  |
| 1AHW.pdb | 0.560   | 0.0016  |
| 1AK4.pdb | 0.289   | 0.0035  |
| 1AKJ.pdb | 0.619   | 0.0005  |
| 1AVX.pdb | 0.407   | 0.0035  |
| 1AY7.pdb | 0.526   | 0.0008  |
| 1AZS.pdb | 0.157   | 0.0041  |
| 1B6C.pdb | 0.261   | 0.0016  |
| 1BGX.pdb | 0.321   | 0.0044  |
| 1BJ1.pdb | 0.281   | 0.0011  |
| 1BKD.pdb | 0.488   | 0.0013  |
| 1BUH.pdb | 0.213   | 0.0017  |
| 1BVK.pdb | 0.522   | 0.0015  |
| 1BVN.pdb | 0.352   | 0.0029  |
| 1CGI.pdb | 0.240   | 0.0034  |
| 1D6R.pdb | 0.506   | 0.0022  |
| 1DE4.pdb | 0.336   | 0.0005  |
| 1DFJ.pdb | 0.446   | 0.0021  |
| 1DQJ.pdb | 0.547   | 0.0034  |
| 1E4K.pdb | 0.248   | 0.0038  |
| 1E6J.pdb | 0.283   | 0.0024  |
| 1E96.pdb | 0.395   | 0.0028  |

|          |       |        |
|----------|-------|--------|
| 1EAW.pdb | 0.547 | 0.0011 |
| 1EER.pdb | 0.463 | 0.0009 |
| 1EFN.pdb | 0.311 | 0.0009 |
| 1EWY.pdb | 0.388 | 0.0047 |
| 1EZU.pdb | 0.252 | 0.0019 |
| 1F34.pdb | 0.379 | 0.0038 |
| 1F51.pdb | 0.335 | 0.0019 |
| 1FAK.pdb | 0.496 | 0.001  |
| 1FC2.pdb | 0.155 | 0.0026 |
| 1FQ1.pdb | 0.449 | 0.0014 |
| 1FQJ.pdb | 0.507 | 0.0006 |
| 1FSK.pdb | 0.355 | 0.0057 |
| 1GCQ.pdb | 0.335 | 0.0025 |
| 1GHQ.pdb | 0.351 | 0.0026 |
| 1GLA.pdb | 0.293 | 0.0024 |
| 1GP2.pdb | 0.334 | 0.0021 |
| 1GPW.pdb | 0.458 | 0.0031 |
| 1GRN.pdb | 0.457 | 0.0017 |
| 1H1V.pdb | 0.470 | 0.001  |
| 1HE1.pdb | 0.318 | 0.001  |
| 1HE8.pdb | 0.473 | 0.0011 |
| 1HIA.pdb | 0.398 | 0.003  |
| 1I2M.pdb | 0.709 | 0.0007 |
| 1I4D.pdb | 0.107 | 0.0012 |
| 1I9R.pdb | 0.286 | 0.0015 |
| 1IB1.pdb | 0.517 | 0.001  |
| 1IBR.pdb | 0.510 | 0.0015 |
| 1IJK.pdb | 0.401 | 0.0013 |
| 1IQD.pdb | 0.423 | 0.001  |
| 1IRA.pdb | 0.448 | 0.0019 |
| 1J2J.pdb | 0.155 | 0.0019 |
| 1JMO.pdb | 0.425 | 0.0021 |
| 1JPS.pdb | 0.564 | 0.0006 |
| 1K4C.pdb | 0.418 | 0.0027 |
| 1K5D.pdb | 0.344 | 0.0046 |
| 1K74.pdb | 0.355 | 0.0004 |
| 1KAC.pdb | 0.433 | 0.0015 |
| 1KKL.pdb | 0.265 | 0.0006 |
| 1KLU.pdb | 0.334 | 0.0019 |
| 1KTZ.pdb | 0.527 | 0.0011 |
| 1KXP.pdb | 0.356 | 0.0012 |
| 1KXQ.pdb | 0.323 | 0.0021 |
| 1M10.pdb | 0.425 | 0.0006 |
| 1MAH.pdb | 0.288 | 0.0019 |
| 1ML0.pdb | 0.306 | 0.0029 |
| 1MLC.pdb | 0.324 | 0.0008 |

|          |       |        |
|----------|-------|--------|
| 1N2C.pdb | 0.291 | 0.0012 |
| 1N80.pdb | 0.242 | 0.0026 |
| 1NCA.pdb | 0.422 | 0.0029 |
| 1NSN.pdb | 0.674 | 0.0014 |
| 1NW9.pdb | 0.311 | 0.001  |
| 1OPH.pdb | 0.471 | 0.0054 |
| 1PPE.pdb | 0.417 | 0.0024 |
| 1PXV.pdb | 0.307 | 0.0018 |
| 1QA9.pdb | 0.475 | 0      |
| 1QFW.pdb | 0.490 | 0.0023 |
| 1R0R.pdb | 0.278 | 0      |
| 1R8S.pdb | 0.381 | 0.002  |
| 1RLB.pdb | 0.334 | 0.003  |
| 1S1Q.pdb | 0.431 | 0.0009 |
| 1SBB.pdb | 0.409 | 0      |
| 1T6B.pdb | 0.403 | 0.0022 |
| 1UDI.pdb | 0.381 | 0.001  |
| 1VFB.pdb | 0.554 | 0.0016 |
| 1WEJ.pdb | 0.526 | 0.0045 |
| 1WQ1.pdb | 0.333 | 0.0041 |
| 1XD3.pdb | 0.455 | 0.0023 |
| 1XQS.pdb | 0.586 | 0.0038 |
| 1YVB.pdb | 0.258 | 0.0039 |
| 1Z0K.pdb | 0.489 | 0.0012 |
| 1Z5Y.pdb | 0.234 | 0.0016 |
| 1ZHI.pdb | 0.405 | 0      |
| 2AJF.pdb | 0.297 | 0.0006 |
| 2B42.pdb | 0.412 | 0.0037 |
| 2C0L.pdb | 0.446 | 0.0026 |
| 2CFH.pdb | 0.278 | 0.002  |
| 2FD6.pdb | 0.462 | 0.0018 |
| 2H7V.pdb | 0.473 | 0.0027 |
| 2HLE.pdb | 0.576 | 0.0014 |
| 2HQS.pdb | 0.496 | 0.0023 |
| 2HRK.pdb | 0.134 | 0.004  |
| 2I25.pdb | 0.494 | 0.0036 |
| 2JEL.pdb | 0.463 | 0      |
| 2MTA.pdb | 0.187 | 0.0033 |
| 2NZ8.pdb | 0.405 | 0.0015 |
| 2O0B.pdb | 0.278 | 0      |
| 2PCC.pdb | 0.537 | 0.0008 |
| 2QFW.pdb | 0.333 | 0.0023 |
| 2SIC.pdb | 0.359 | 0.0051 |
| 2SNI.pdb | 0.347 | 0.0052 |
| 2UUY.pdb | 0.544 | 0.004  |
| 2VIS.pdb | 0.358 | 0.0008 |



|               |             |        |
|---------------|-------------|--------|
| 7CEI.pdb      | 0.876       | 0.0015 |
| design_1_mpm  | 0.38644222  | 0.0017 |
| design_10_mpm | 0.232179226 | 0.0024 |
| design_11_mpm | 0.221148126 | 0.0025 |
| design_12_mpm | 0.24177502  | 0.0013 |
| design_13_mpm | 0.406802613 | 0.0024 |
| design_14_mpm | 0.237636609 | 0.0039 |
| design_15_mpm | 0.401149125 | 0.0062 |
| design_16_mpm | 0.268679245 | 0.0034 |
| design_17_mpm | 0.252458854 | 0.0049 |
| design_18_mpm | 0.353486774 | 0.0046 |
| design_19_mpm | 0.412245527 | 0.0041 |
| design_2_mpm  | 0.36316068  | 0.004  |
| design_20_mpm | 0.277714204 | 0.0011 |
| design_21_mpm | 0.221550252 | 0.0025 |
| design_22_mpm | 0.384964225 | 0.0009 |
| design_23_mpm | 0.247426285 | 0.0063 |
| design_24_mpm | 0.5321248   | 0.0008 |
| design_25_mpm | 0.332567559 | 0.0011 |
| design_26_mpm | 0.195685542 | 0.0019 |
| design_27_mpm | 0.301869907 | 0.0041 |
| design_28_mpm | 0.486297299 | 0.0058 |
| design_29_mpm | 0.335901801 | 0.0025 |
| design_3_mpm  | 0.319663956 | 0.0021 |
| design_30_mpm | 0.232053422 | 0.0021 |
| design_31_mpm | 0.346559518 | 0.0055 |
| design_32_mpm | 0.242469319 | 0.0063 |
| design_33_mpm | 0.31830367  | 0.0015 |
| design_34_mpm | 0.185527502 | 0.0028 |
| design_35_mpm | 0.146615314 | 0.0033 |
| design_36_mpm | 0.366129505 | 0.0024 |
| design_37_mpm | 0.410373208 | 0      |
| design_38_mpm | 0.239289762 | 0.0014 |
| design_39_mpm | 0.211769017 | 0.0029 |
| design_4_mpm  | 0.349438546 | 0.003  |
| design_40_mpm | 0.490196078 | 0.0034 |
| design_41_mpm | 0.272722322 | 0.0027 |
| design_42_mpm | 0.300838779 | 0.0032 |
| design_43_mpm | 0.309697361 | 0.0017 |
| design_44_mpm | 0.196493656 | 0.0064 |
| design_45_mpm | 0.224746841 | 0.0028 |
| design_46_mpm | 0.245262114 | 0.006  |
| design_47_mpm | 0.291365818 | 0.0026 |
| design_48_mpm | 0.125685904 | 0.003  |
| design_49_mpm | 0.069713484 | 0.002  |
| design_5_mpm  | 0.34329988  | 0.0051 |

|               |             |        |
|---------------|-------------|--------|
| design_50_mpm | 0.358207462 | 0.0019 |
| design_51_mpm | 0.264592263 | 0.0038 |
| design_52_mpm | 0.422646671 | 0.0021 |
| design_53_mpm | 0.423233417 | 0.0031 |
| design_54_mpm | 0.25052101  | 0.0028 |
| design_55_mpm | 0.366002316 | 0      |
| design_56_mpm | 0.22731681  | 0.0037 |
| design_57_mpm | 0.419863935 | 0.0036 |
| design_58_mpm | 0.347446472 | 0.0036 |
| design_59_mpm | 0.31268475  | 0.0042 |
| design_6_mpm  | 0.172630923 | 0.0025 |
| design_60_mpm | 0.217168881 | 0.0032 |
| design_61_mpm | 0.253796694 | 0.0013 |
| design_62_mpm | 0.203851079 | 0.0007 |
| design_63_mpm | 0.410011919 | 0.0026 |
| design_64_mpm | 0.301096951 | 0.0021 |
| design_65_mpm | 0.282047042 | 0.005  |
| design_66_mpm | 0.188052976 | 0.0018 |
| design_67_mpm | 0.599531929 | 0.0025 |
| design_68_mpm | 0.364227739 | 0.0028 |
| design_69_mpm | 0.158223456 | 0.0021 |
| design_7_mpm  | 0.218252348 | 0.0036 |
| design_70_mpm | 0.18357608  | 0.0048 |
| design_71_mpm | 0.355073952 | 0.0029 |
| design_72_mpm | 0.252224971 | 0.0035 |
| design_73_mpm | 0.486963107 | 0.0032 |
| design_74_mpm | 0.22371184  | 0.0024 |
| design_75_mpm | 0.487403533 | 0.0009 |
| design_76_mpm | 0.341107753 | 0.004  |
| design_77_mpm | 0.307604833 | 0.0029 |
| design_78_mpm | 0.327183199 | 0.0062 |
| design_79_mpm | 0.493601774 | 0.0021 |
| design_8_mpm  | 0.410100614 | 0      |
| design_80_mpm | 0.198755304 | 0.001  |
| design_81_mpm | 0.431535091 | 0.0042 |
| design_82_mpm | 0.271087775 | 0.0007 |
| design_83_mpm | 0.220336091 | 0      |
| design_84_mpm | 0.380659753 | 0.0016 |
| design_85_mpm | 0.181626343 | 0.0037 |
| design_86_mpm | 0.157102827 | 0.0048 |
| design_87_mpm | 0.2237447   | 0.0026 |
| design_9_mpm  | 0.232508902 | 0.0041 |

\*\*\*\*\*

Group 08

REMARK Please use this file to submit your results for both designs and  
REMARK the ZDock benchmark.

REMARK Change the file name from GroupXXX.txt to represent your group's number.

REMARK Change 'Column1' and 'Column2' below to the first- and second-most important parameters in your score function

REMARK Specify the units for each column below:

Units for Sequence-Conservation: arbitrary unit

Units for Hydrogen-bond: kcal/mol

| Sequence-Conservation | Hydrogen-bond    |
|-----------------------|------------------|
| design_1              | -8.1200 -0.4611  |
| design_2              | -7.6424 -0.2946  |
| design_3              | -0.9553 -0.5498  |
| design_4              | -6.2094 -0.2393  |
| design_5              | -5.2541 -0.0498  |
| design_6              | -5.2541 -0.0082  |
| design_7              | -5.2541 -0.1115  |
| design_8              | -10.0306 -0.2275 |
| design_9              | -8.1200 -0.1838  |
| design_10             | -6.2094 -0.1913  |
| design_11             | -10.0306 -0.1612 |
| design_12             | -10.5083 -0.2235 |
| design_13             | -7.6424 -0.5203  |
| design_14             | -3.3435 -0.2984  |
| design_15             | -10.9859 -0.4326 |
| design_16             | -4.7765 -0.1657  |
| design_17             | -5.7318 -0.3320  |
| design_18             | -5.2541 -0.2596  |
| design_19             | -9.0753 -0.2528  |
| design_20             | -10.9859 -0.3607 |
| design_21             | -9.0753 -0.2135  |
| design_22             | -10.9859 -0.1799 |
| design_23             | -2.3882 -0.1930  |
| design_24             | -6.6871 -0.2507  |
| design_25             | -4.7765 -0.2450  |
| design_26             | -3.3435 -0.2068  |
| design_27             | -5.7318 -0.2974  |
| design_28             | -5.2541 -0.3754  |
| design_29             | -5.7318 -0.3854  |
| design_30             | -9.0753 -0.3731  |
| design_31             | -7.1647 -0.1456  |
| design_32             | -4.2988 -0.2081  |
| design_33             | -9.0753 -0.3502  |
| design_34             | -12.4189 -0.2498 |
| design_35             | -7.1647 -0.1507  |

|           |          |         |
|-----------|----------|---------|
| design_36 | -6.2094  | -0.4514 |
| design_37 | -13.3742 | -0.3323 |
| design_38 | -14.3294 | -0.2515 |
| design_39 | -3.3435  | -0.0014 |
| design_40 | -5.2541  | -0.4278 |
| design_41 | -5.2541  | -0.3414 |
| design_42 | -1.9106  | -0.3892 |
| design_43 | -13.3742 | -0.2861 |
| design_44 | -5.2541  | -0.2345 |
| design_45 | -10.5083 | -0.2806 |
| design_46 | -5.7318  | -0.1228 |
| design_47 | -5.7318  | -0.2752 |
| design_48 | -6.6871  | -0.1677 |
| design_49 | -4.7765  | -0.0794 |
| design_50 | -6.6871  | -0.4039 |
| design_51 | -5.2541  | -0.2214 |
| design_52 | -6.6871  | -0.3535 |
| design_53 | -8.5977  | -0.4769 |
| design_54 | -2.3882  | -0.3092 |
| design_55 | -8.5977  | -0.1213 |
| design_56 | -7.1647  | -0.2922 |
| design_57 | -0.9553  | -0.5264 |
| design_58 | -10.5083 | -0.2200 |
| design_59 | -1.9106  | -0.5467 |
| design_60 | -8.5977  | -0.2147 |
| design_61 | -5.7318  | -0.1405 |
| design_62 | -10.5083 | -0.2785 |
| design_63 | -5.7318  | -0.3629 |
| design_64 | -5.7318  | -0.1558 |
| design_65 | -10.0306 | -0.4205 |
| design_66 | -7.1647  | -0.3189 |
| design_67 | -5.2541  | -0.6709 |
| design_68 | -9.5530  | -0.2135 |
| design_69 | -7.6424  | -0.1781 |
| design_70 | -7.6424  | -0.0657 |
| design_71 | -7.1647  | -0.2797 |
| design_72 | -10.5083 | -0.2077 |
| design_73 | -10.5083 | -0.6897 |
| design_74 | -3.3435  | -0.1152 |
| design_75 | -10.0306 | -0.3240 |
| design_76 | -10.0306 | -0.3041 |
| design_77 | -9.5530  | -0.3808 |
| design_78 | -5.7318  | -0.2830 |
| design_79 | -4.2988  | -0.6364 |
| design_80 | -5.7318  | -0.2067 |
| design_81 | -7.6424  | -0.3531 |

|           |          |          |         |
|-----------|----------|----------|---------|
| design_82 | -6.2094  | -0.0797  |         |
| design_83 | -8.1200  | -0.2586  |         |
| design_84 | -5.7318  | -0.3747  |         |
| design_85 | -9.0753  | -0.2614  |         |
| design_86 | -3.8212  | -0.1026  |         |
| design_87 | -3.3435  | -0.2937  |         |
| 1A2K      | -21.0165 | -0.7804  |         |
| 1ACB      | -30.5695 | -0.5408  |         |
| 1AHW      | -3.3435  | -0.9235  |         |
| 1AK4      | -33.4354 | -0.4379  |         |
| 1AKJ      |          | -8.5977  | -0.6566 |
| 1AVX      | -30.5695 | -0.5456  |         |
| 1AY7      | -11.9412 | -0.6297  |         |
| 1AZS      | -4.2988  | -0.0694  |         |
| 1B6C      | -21.9718 | -0.1551  |         |
| 1BGX      | 0.0000   | 0.0000   |         |
| 1BJ1      | -4.2988  | -0.4431  |         |
| 1BKD      | -25.7930 | -1.0183  |         |
| 1BUH      | -16.7177 | -0.2980  |         |
| 1BVK      | -4.7765  | -0.4571  |         |
| 1BVN      | -8.1200  | -0.3806  |         |
| 1CGI      |          | -35.3460 | -0.6704 |
| 1D6R      | -33.4354 | -0.6624  |         |
| 1DE4      | 0.0000   | 0.0000   |         |
| 1DFJ      |          | -16.7177 | -0.3650 |
| 1DQJ      | -6.2094  | -0.7136  |         |
| 1E4K      | -0.9553  | -0.1037  |         |
| 1E6J      |          | -10.5083 | -0.4530 |
| 1E96      | -6.6871  | -0.6642  |         |
| 1EAW      | -39.1672 | -0.5637  |         |
| 1EER      | -3.8212  | -0.7750  |         |
| 1EFN      | -18.1506 | -0.2879  |         |
| 1EWY      | -10.9859 | -0.2702  |         |
| 1EZU      | -42.9883 | -0.6969  |         |
| 1F34      | -14.8071 | -0.9747  |         |
| 1F51      | -27.7036 | -0.4473  |         |
| 1FAK      | -16.7177 | -1.0487  |         |
| 1FC2      | -2.3882  | -0.0842  |         |
| 1FQ1      | -18.1506 | -0.1733  |         |
| 1FQJ      |          | -9.0753  | -0.7453 |
| 1FSK      | -8.1200  | -0.6723  |         |
| 1GCQ      | -12.8965 | -0.5177  |         |
| 1GHQ      | -2.8659  | -0.1732  |         |
| 1GLA      | -9.0753  | -0.1124  |         |
| 1GP2      | -19.1059 | -0.7585  |         |
| 1GPW      | -41.0777 | -0.6171  |         |

|      |          |         |
|------|----------|---------|
| 1GRN | -41.0777 | -0.6142 |
| 1H1V | -13.8518 | -0.5178 |
| 1HE1 | -20.0612 | -0.7766 |
| 1HE8 | -11.4636 | -0.3629 |
| 1HIA | -23.8824 | -0.8605 |
| 1I2M | -21.0144 | -1.5992 |
| 1I4D | -15.7624 | -0.1400 |
| 1I9R | -2.3882  | -0.2215 |
| 1IB1 | -17.1953 | -1.1654 |
| 1IBR | -17.6730 | -0.6563 |
| 1IJK | -2.8659  | -0.4362 |
| 1IQD | -0.4776  | -1.0937 |
| 1IRA | -6.2094  | -0.9910 |
| 1J2J | -11.4636 | -0.0879 |
| 1JMO | -32.4801 | -1.4287 |
| 1JPS | -3.3435  | -0.9684 |
| 1K4C | -2.3882  | -0.5813 |
| 1K5D | -25.3154 | -0.6779 |
| 1K74 | -15.7608 | -0.2904 |
| 1KAC | -3.8212  | -0.4010 |
| 1KKL | -17.1953 | -0.3186 |
| 1KLU | 0.0000   | -0.2773 |
| 1KTZ | -7.1647  | -0.5160 |
| 1KXP | -12.8952 | -0.9468 |
| 1KXQ | -19.5836 | -0.6461 |
| 1M10 | -1.4328  | -0.8364 |
| 1MAH | -3.3435  | -0.5422 |
| 1ML0 | -10.5083 | -0.8744 |
| 1MLC | -5.2541  | -0.3461 |
| 1N2C | 0.0000   | 0.0000  |
| 1N80 | -32.0024 | -0.6183 |
| 1NCA | -8.1200  | -0.5403 |
| 1NSN | -3.3435  | -0.1793 |
| 1NW9 | -13.3742 | -0.5268 |
| 1OPH | -29.6142 | -0.6569 |
| 1PPE | -36.7789 | -0.8165 |
| 1PXV | -5.2541  | -0.6362 |
| 1QA9 | -0.9553  | -0.3484 |
| 1QFW | -8.1200  | -0.4570 |
| 1R0R | -45.8542 | -0.7529 |
| 1R8S | -20.5368 | -0.6802 |
| 1RLB | -1.9106  | -0.1560 |
| 1S1Q | -14.8071 | -0.3032 |
| 1SBB | -2.3882  | -0.2698 |
| 1T6B | -6.2094  | -0.6164 |
| 1UDI | -16.2400 | -0.6097 |

|      |          |          |         |
|------|----------|----------|---------|
| 1VFB | -5.2541  | -0.7765  |         |
| 1WEJ | -3.8212  | -0.7503  |         |
| 1WQ1 | -22.4495 | -0.4254  |         |
| 1XD3 | -25.3154 | -0.9119  |         |
| 1XQS | -21.0165 | -1.1821  |         |
| 1Y64 | -19.1059 | -0.1390  |         |
| 1YVB | -24.8377 | -0.2236  |         |
| 1Z0K | -26.7483 | -0.9349  |         |
| 1Z5Y | -12.4189 | -0.2921  |         |
| 1ZHI |          | -0.4776  | -0.2781 |
| 2AJF |          | -3.8212  | -0.2339 |
| 2B42 | -15.2847 | -0.3982  |         |
| 2C0L | -8.5977  | -0.6159  |         |
| 2CFH | -21.9718 | -0.7419  |         |
| 2FD6 | -3.3435  | -0.5515  |         |
| 2H7V | -17.6730 | -0.4232  |         |
| 2HLE | -8.5977  | -0.9689  |         |
| 2HMI | 0.0000   | 0.0000   |         |
| 2HQS | -6.2094  | -0.7396  |         |
| 2HRK | -10.5083 | -0.0272  |         |
| 2I25 |          | 0.0000   | 0.0000  |
| 2JEL |          | -10.0306 | -0.5498 |
| 2MTA | -10.5083 | 0.0000   |         |
| 2NZ8 | -29.6142 | -0.9307  |         |
| 2O8V | -30.0918 | -0.1562  |         |
| 2O0B | -12.4189 | -0.2023  |         |
| 2OT3 | -32.4801 | -0.5291  |         |
| 2PCC | -6.6871  | -0.2195  |         |
| 2QFW | -4.2988  | -0.1162  |         |
| 2SIC | -39.1672 | -0.7933  |         |
| 2SNI | -39.1672 | -0.6488  |         |
| 2UUY | -29.1365 | -0.8890  |         |
| 2VIS | -4.7765  | -0.2537  |         |
| 7CEI | -7.1647  | -1.0035  |         |

\*\*\*\*\*

Group 23-

REMARK Please use this file to submit your results for both designs and  
REMARK the ZDock benchmark.

REMARK Change the file name from GroupXXX.txt to represent your group's  
number.

REMARK Change 'Column1' and 'Column2' below to the first- and second-most  
REMARK important parameters in your score function

REMARK Specify the units for each column below:

Units for Column1: complementarity score of electrostatic potential (Ecmp)

Units for Column2: complementarity score of hydrophobicity (Hcmp)

| Column1   | Column2 |       |
|-----------|---------|-------|
| design_1  | 0.240   | 0.127 |
| design_2  | 0.128   | 0.078 |
| design_3  | 0.324   | 0.088 |
| design_4  | 0.629   | 0.165 |
| design_5  | 0.459   | 0.268 |
| design_6  | 0.908   | 0.210 |
| design_7  | 0.539   | 0.125 |
| design_8  | 0.706   | 0.207 |
| design_9  | 0.329   | 0.222 |
| design_10 | 0.088   | 0.161 |
| design_11 | 0.382   | 0.130 |
| design_12 | 0.072   | 0.225 |
| design_13 | 0.722   | 0.092 |
| design_14 | 0.391   | 0.104 |
| design_15 | 0.456   | 0.187 |
| design_16 | 0.307   | 0.121 |
| design_17 | 0.279   | 0.138 |
| design_18 | 0.350   | 0.113 |
| design_19 | 0.610   | 0.172 |
| design_20 | 0.702   | 0.138 |
| design_21 | 0.538   | 0.224 |
| design_22 | 0.778   | 0.187 |
| design_23 | 0.430   | 0.170 |
| design_24 | 0.716   | 0.201 |
| design_25 | 0.843   | 0.116 |
| design_26 | 0.903   | 0.047 |
| design_27 | 0.742   | 0.106 |
| design_28 | 0.445   | 0.141 |
| design_29 | 0.759   | 0.110 |
| design_30 | 0.289   | 0.095 |
| design_31 | -       | -     |
| design_32 | 0.440   | 0.215 |
| design_33 | 0.608   | 0.183 |
| design_34 | 0.487   | 0.064 |
| design_35 | 0.359   | 0.048 |
| design_36 | 0.292   | 0.176 |
| design_37 | 0.731   | 0.221 |
| design_38 | 0.806   | 0.164 |
| design_39 | 0.239   | 0.078 |
| design_40 | 0.790   | 0.080 |
| design_41 | 0.174   | 0.137 |
| design_42 | 0.493   | 0.186 |



|           |       |       |
|-----------|-------|-------|
| design_43 | -     | -     |
| design_44 | 0.218 | 0.119 |
| design_45 | 0.056 | 0.182 |
| design_46 | 0.395 | 0.058 |
| design_47 | 0.374 | 0.134 |
| design_48 | 0.017 | 0.149 |
| design_49 | 0.206 | 0.038 |
| design_50 | 0.379 | 0.132 |
| design_51 | 0.853 | 0.045 |
| design_52 | 0.367 | 0.138 |
| design_53 | 0.695 | 0.099 |
| design_54 | 0.125 | 0.124 |
| design_55 | 0.439 | 0.121 |
| design_56 | 0.139 | 0.130 |
| design_57 | 0.508 | 0.179 |
| design_58 | 0.115 | 0.180 |
| design_59 | 0.430 | 0.188 |
| design_60 | 0.057 | 0.119 |
| design_61 | 0.903 | 0.147 |
| design_62 | 0.457 | 0.148 |
| design_63 | 0.893 | 0.122 |
| design_64 | 0.296 | 0.213 |
| design_65 | 0.557 | 0.183 |
| design_66 | 0.546 | 0.238 |
| design_67 | 0.212 | 0.154 |
| design_68 | 0.459 | 0.237 |
| design_69 | 0.794 | 0.216 |
| design_70 | 0.794 | 0.183 |
| design_71 | 0.523 | 0.173 |
| design_72 | 0.781 | 0.197 |
| design_73 | 0.767 | 0.143 |
| design_74 | 0.258 | 0.099 |
| design_75 | 0.687 | 0.109 |
| design_76 | 0.248 | 0.183 |
| design_77 | 0.788 | 0.151 |
| design_78 | 0.952 | 0.133 |
| design_79 | 0.207 | 0.123 |
| design_80 | 0.403 | 0.114 |
| design_81 | 0.461 | 0.119 |
| design_82 | 0.479 | 0.272 |
| design_83 | 0.787 | 0.205 |
| design_84 | 0.742 | 0.177 |
| design_85 | 0.691 | 0.093 |
| design_86 | 0.218 | 0.195 |
| design_87 | 0.622 | 0.137 |
| 1A2K      | 0.875 | 0.163 |

|      |       |       |
|------|-------|-------|
| 1ACB | 0.627 | 0.234 |
| 1AHW | 0.880 | 0.075 |
| 1AK4 | 0.686 | 0.177 |
| 1AKJ | 0.828 | 0.106 |
| 1AVX | 0.827 | 0.072 |
| 1AY7 | 0.549 | 0.083 |
| 1AZS | 0.794 | 0.116 |
| 1B6C | 0.627 | 0.182 |
| 1BGX | 0.529 | 0.110 |
| 1BJ1 | 0.545 | 0.038 |
| 1BKD | 0.574 | 0.156 |
| 1BUH | 0.507 | 0.098 |
| 1BVK | 0.602 | 0.032 |
| 1BVN | 0.399 | 0.085 |
| 1CGI | 0.550 | 0.138 |
| 1D6R | 0.710 | 0.123 |
| 1DE4 | -     | -     |
| 1DFJ | 0.769 | 0.058 |
| 1DQJ | 0.500 | 0.047 |
| 1E4K | 0.857 | 0.135 |
| 1E6J | 0.904 | 0.161 |
| 1E96 | 0.883 | 0.246 |
| 1EAW | 0.844 | 0.123 |
| 1EER | 0.944 | 0.161 |
| 1EFN | 0.788 | 0.137 |
| 1EWY | 0.559 | 0.136 |
| 1EZU | 0.353 | 0.121 |
| 1F34 | 0.423 | 0.193 |
| 1F51 | 0.478 | 0.264 |
| 1FAK | 0.483 | 0.124 |
| 1FC2 | 0.339 | 0.198 |
| 1FQ1 | 0.826 | 0.172 |
| 1FQJ | 0.703 | 0.121 |
| 1FSK | 0.556 | 0.032 |
| 1GCQ | 0.530 | 0.127 |
| 1GHQ | 0.407 | 0.184 |
| 1GLA | 0.760 | 0.173 |
| 1GP2 | 0.722 | 0.177 |
| 1GPW | 0.915 | 0.133 |
| 1GRN | 0.823 | 0.219 |
| 1H1V | 0.153 | 0.240 |
| 1HE1 | 0.694 | 0.223 |
| 1HE8 | 0.768 | 0.163 |
| 1HIA | 0.757 | 0.147 |
| 1I2M | 0.834 | 0.101 |
| 1I4D | 0.389 | 0.191 |

|      |       |       |
|------|-------|-------|
| 1I9R | 0.796 | 0.065 |
| 1IB1 | 0.592 | 0.207 |
| 1IBR | 0.800 | 0.173 |
| 1IJK | 0.961 | 0.170 |
| 1IQD | 0.478 | 0.161 |
| 1IRA | 0.745 | 0.169 |
| 1J2J | 0.720 | 0.293 |
| 1JMO | -     | -     |
| 1JPS | 0.875 | 0.100 |
| 1K4C | 0.797 | 0.090 |
| 1K5D | 0.595 | 0.219 |
| 1K74 | 0.868 | 0.217 |
| 1KAC | 0.765 | 0.248 |
| 1KKL | 0.595 | 0.233 |
| 1KLU | 0.646 | 0.070 |
| 1KTZ | 0.921 | 0.134 |
| 1KXP | 0.789 | 0.244 |
| 1KXQ | 0.820 | 0.110 |
| 1M10 | 0.775 | 0.083 |
| 1MAH | 0.990 | 0.169 |
| 1ML0 | 0.955 | 0.173 |
| 1MLC | 0.696 | 0.073 |
| 1N2C | -     | -     |
| 1N80 | 0.321 | 0.139 |
| 1NCA | 0.610 | 0.098 |
| 1NSN | 0.727 | 0.083 |
| 1NW9 | 0.569 | 0.141 |
| 1OPH | 0.758 | 0.201 |
| 1PPE | 0.781 | 0.143 |
| 1PXV | 0.675 | 0.184 |
| 1QA9 | 0.780 | 0.084 |
| 1QFW | 0.878 | 0.074 |
| 1R0R | 0.444 | 0.198 |
| 1R8S | 0.729 | 0.193 |
| 1RLB | 0.718 | 0.196 |
| 1S1Q | 0.550 | 0.146 |
| 1SBB | 0.577 | 0.134 |
| 1T6B | 0.387 | 0.166 |
| 1UDI | 0.923 | 0.231 |
| 1VFB | 0.537 | 0.047 |
| 1WEJ | 0.762 | 0.041 |
| 1WQ1 | 0.837 | 0.154 |
| 1XD3 | 0.811 | 0.241 |
| 1XQS | 0.916 | 0.111 |
| 1Y64 | 0.831 | 0.207 |
| 1YVB | -     | -     |

|      |       |       |
|------|-------|-------|
| 1Z0K | 0.661 | 0.148 |
| 1Z5Y | 0.636 | 0.042 |
| 1ZHI | 0.890 | 0.132 |
| 2AJF | 0.714 | 0.123 |
| 2B42 | 0.587 | 0.084 |
| 2C0L | 0.710 | 0.294 |
| 2CFH | 0.752 | 0.312 |
| 2FD6 | -     | -     |
| 2H7V | -     | -     |
| 2HLE | 0.820 | 0.164 |
| 2HMI | 0.777 | 0.136 |
| 2HQS | 0.602 | 0.177 |
| 2HRK | 0.690 | 0.288 |
| 2I25 | 0.611 | 0.075 |
| 2JEL | 0.115 | 0.087 |
| 2MTA | 0.751 | 0.253 |
| 2NZ8 | 0.600 | 0.214 |
| 2O8V | 0.671 | 0.171 |
| 2O0B | 0.676 | 0.352 |
| 2OT3 | 0.808 | 0.207 |
| 2PCC | 0.999 | 0.164 |
| 2QFW | 0.524 | 0.053 |
| 2SIC | 0.368 | 0.239 |
| 2SNI | 0.697 | 0.195 |
| 2UUY | 0.729 | 0.138 |
| 2VIS | 0.671 | 0.058 |
| 7CEI | 0.978 | 0.089 |

\*\*\*\*\*

Group 33-

REMARK Please use this file to submit your results for both designs and  
REMARK the ZDock benchmark.

REMARK Change the file name from Group33.txt to represent your group's  
number.

REMARK Change 'Column1' and 'Column2' below to the first- and second-most  
REMARK important parameters in your score function

REMARK Specify the units for each column below:

Units for Column1: 12-6 Lennard-Jones Potential potential (CHARMM-based)

Units for Column2: Atom Contact Potential (see methods section)

|          |                        |              |
|----------|------------------------|--------------|
| vdw_attr | atom_contact_potential |              |
| design_1 | -19.03942337           | -1.789190923 |
| design_2 | -18.77413121           | -0.502496294 |
| design_3 | -30.9419549            | -2.03805566  |
| design_4 | -18.85804009           | -0.709955479 |

|           |              |              |
|-----------|--------------|--------------|
| design_5  | -19.53897966 | -0.900893462 |
| design_6  | -21.06502619 | -0.137760721 |
| design_7  | -22.81517504 | -1.329733913 |
| design_8  | -20.81640728 | -2.002594486 |
| design_9  | -17.56596171 | -2.307179379 |
| design_10 | -19.5046959  | -3.488646828 |
| design_11 | -19.12619334 | -0.44158851  |
| design_12 | -24.57296991 | -2.46215051  |
| design_13 | -21.95147098 | -0.870078876 |
| design_14 | -19.26520288 | -4.067709271 |
| design_15 | -25.51195025 | 0.687776332  |
| design_16 | -23.89671662 | -2.014751997 |
| design_17 | -22.88660365 | 0.385550095  |
| design_18 | -20.4319359  | -0.860258804 |
| design_19 | -25.62545662 | -0.591743314 |
| design_20 | -34.42483942 | -0.733142447 |
| design_21 | -20.07252372 | -3.654396345 |
| design_22 | -21.55767639 | -2.093036747 |
| design_23 | -21.54332161 | -3.903841022 |
| design_24 | -23.4800333  | -0.357260367 |
| design_25 | -16.02797753 | -0.887742275 |
| design_26 | -21.44106229 | -0.936860315 |
| design_27 | -22.01712808 | -1.630499693 |
| design_28 | -20.6971294  | 0.339257845  |
| design_29 | -23.69431912 | -0.564581639 |
| design_30 | -28.72549761 | -3.187088936 |
| design_31 | -18.85971729 | -0.787296059 |
| design_32 | -15.73437044 | -2.021265707 |
| design_33 | -28.51254368 | -2.075656245 |
| design_34 | -28.04233824 | -1.610021466 |
| design_35 | -29.15870619 | -3.793086736 |
| design_36 | -19.74769128 | -1.430551432 |
| design_37 | -24.50963128 | -2.036591667 |
| design_38 | -28.03242308 | -3.540813086 |
| design_39 | -17.53064204 | -1.109615076 |
| design_40 | -19.74048923 | 0.079345968  |
| design_41 | -20.3151738  | -1.721967456 |
| design_42 | -21.60305921 | -1.619470235 |
| design_43 | -22.92236728 | -1.68495742  |
| design_44 | -27.63744459 | -3.479686057 |
| design_45 | -26.55289393 | -3.288362626 |
| design_46 | -18.83707521 | -0.741813249 |
| design_47 | -21.22855231 | -2.312367008 |
| design_48 | -22.69594649 | -2.451068009 |
| design_49 | -20.08426406 | -3.167339169 |
| design_50 | -20.92764451 | -0.638103106 |

|           |              |              |
|-----------|--------------|--------------|
| design_51 | -23.66610285 | -2.051256355 |
| design_52 | -26.78508623 | 1.560362385  |
| design_53 | -24.18139513 | -0.497375854 |
| design_54 | -20.8939527  | -2.233017857 |
| design_55 | -19.44214654 | -1.825613948 |
| design_56 | -19.93553668 | -1.812614817 |
| design_57 | -24.92937301 | -1.977604048 |
| design_58 | -23.93336817 | -1.552801955 |
| design_59 | -23.4580325  | -2.637900445 |
| design_60 | -18.60547485 | -1.489454182 |
| design_61 | -25.79791132 | -0.255264228 |
| design_62 | -25.05723416 | -1.89085006  |
| design_63 | -22.81729619 | -0.614106344 |
| design_64 | -16.96981896 | -1.354908235 |
| design_65 | -20.77428019 | -0.055215538 |
| design_66 | -21.05516036 | -4.469847755 |
| design_67 | -21.49029278 | 1.544887904  |
| design_68 | -20.1848462  | -1.543254172 |
| design_69 | -22.7936182  | -2.588626811 |
| design_70 | -19.86691983 | -1.560514442 |
| design_71 | -25.69496139 | -2.986436967 |
| design_72 | -26.42700595 | -0.795111096 |
| design_73 | -18.59284659 | 0.39408652   |
| design_74 | -17.26643512 | -1.858903885 |
| design_75 | -18.99857884 | -1.462865373 |
| design_76 | -26.78355703 | 1.283932844  |
| design_77 | -23.69959734 | -0.891144115 |
| design_78 | -18.20595808 | -1.222890683 |
| design_79 | -19.44382373 | 0.786656004  |
| design_80 | -19.49122904 | -1.196772191 |
| design_81 | -25.31853066 | 1.087959289  |
| design_82 | -23.79485192 | -2.424613577 |
| design_83 | -31.08308559 | -2.87679659  |
| design_84 | -26.6562385  | 0.240597418  |
| design_85 | -24.48087239 | -3.099712574 |
| design_86 | -17.71118673 | -1.073259239 |
| design_87 | -22.63867535 | -2.540315028 |
| 1A2K      | -83.54828514 | -0.988556257 |
| 1ACB      | -29.92656371 | -7.246201666 |
| 1AHW      | -97.07236443 | -3.642762194 |
| 1AK4      | -18.79361623 | -2.365056627 |
| 1AKJ      | -107.650507  | -2.425154618 |
| 1AVX      | -36.81113696 | -1.207904199 |
| 1AY7      | -28.41275081 | 3.25513634   |
| 1AZS      | -83.0929771  | 0.329659494  |
| 1B6C      | -32.36963911 | -1.919153933 |

|      |              |              |
|------|--------------|--------------|
| 1BGX | -154.7203803 | 0.843051577  |
| 1BJ1 | -146.1898907 | -22.02931732 |
| 1BKD | -51.47792597 | 2.332739149  |
| 1BUH | -26.40352527 | 0.923475737  |
| 1BVK | -59.31139472 | -1.39067706  |
| 1BVN | -40.96144485 | -3.743791885 |
| 1CGI | -43.00880182 | -7.928196285 |
| 1D6R | -22.87358075 | 0.496028555  |
| 1DE4 | -180.0153809 | 0.062843509  |
| 1DFJ | -33.52596368 | 5.147209931  |
| 1DQJ | -95.51553651 | -4.93829029  |
| 1E4K | -67.10638673 | 0.203534338  |
| 1E6J | -82.9829731  | -7.890500222 |
| 1E96 | -24.1177112  | 0.779466877  |
| 1EAW | -36.63355203 | -0.101826047 |
| 1EER | -59.92307616 | 1.706309092  |
| 1EFN | -22.98516328 | -0.61583909  |
| 1EWY | -19.70482425 | 2.601240494  |
| 1EZU | -107.4226063 | -12.23467086 |
| 1F34 | -53.05596543 | -5.755120825 |
| 1F51 | -85.73800603 | -10.92432602 |
| 1FAK | -82.81081438 | -0.057589753 |
| 1FC2 | -20.15075975 | -1.05870771  |
| 1FQ1 | -23.60843707 | 1.359827111  |
| 1FQJ | -32.84561606 | 4.015550085  |
| 1FSK | -100.4686763 | -6.870867699 |
| 1GCQ | -22.7590878  | -1.982993241 |
| 1GHQ | -11.8887687  | -0.467823696 |
| 1GLA | -18.63339515 | -1.280615873 |
| 1GP2 | -108.2755073 | -12.09357584 |
| 1GPW | -34.82016321 | 0.727381951  |
| 1GRN | -37.40969685 | 2.718879792  |
| 1H1V | -31.86460729 | -0.274023146 |
| 1HE1 | -36.45937081 | -0.900387783 |
| 1HE8 | -21.32203105 | 0.894492911  |
| 1HIA | -166.7196956 | -35.60085464 |
| 1I2M | -50.78337157 | 7.311480213  |
| 1I4D | -89.19449945 | -9.851155186 |
| 1I9R | -189.306526  | -16.92945732 |
| 1IB1 | -77.11675079 | 6.56081228   |
| 1IBR | -56.37877686 | 7.275693707  |
| 1IJK | -106.0576688 | -12.19626755 |
| 1IQD | -95.93779402 | -9.237904607 |
| 1IRA | -48.94556482 | 1.091799619  |
| 1J2J | -18.57232567 | -3.033535828 |
| 1JMO | -143.2552996 | -8.168234627 |

|      |              |              |
|------|--------------|--------------|
| 1JPS | -98.16500507 | -3.5809845   |
| 1K4C | -100.8578833 | -6.719659103 |
| 1K5D | -134.5541312 | -3.98354733  |
| 1K74 | -67.36931109 | -1.790690278 |
| 1KAC | -21.75943261 | 0.696079367  |
| 1KKL | -116.1144023 | -13.14397344 |
| 1KLU | -122.8137939 | -9.003241313 |
| 1KTZ | -17.82962601 | -2.454218777 |
| 1KXP | -50.71233759 | 2.56219006   |
| 1KXQ | -37.14420737 | -1.855519726 |
| 1M10 | -33.8045747  | 3.454327852  |
| 1MAH | -33.57297435 | -4.197064053 |
| 1ML0 | -83.47133167 | -7.826600799 |
| 1MLC | -91.05963455 | -4.221181046 |
| 1N2C | -724.7290477 | -19.07434913 |
| 1N80 | -177.2322304 | -41.6247986  |
| 1NCA | -97.10689484 | -6.425445931 |
| 1NSN | -78.75349193 | -5.019693982 |
| 1NW9 | -41.37038349 | -6.412220483 |
| 1OPH | -30.04520031 | -2.438037053 |
| 1PPE | -35.78523867 | -4.661687474 |
| 1PXV | -47.68841147 | -2.741225141 |
| 1QA9 | -18.78404637 | 4.597540515  |
| 1QFW | -129.4051547 | -18.38220558 |
| 1R0R | -30.91151882 | -5.194453777 |
| 1R8S | -50.25357651 | -6.294747387 |
| 1RLB | -117.9558594 | -23.36568871 |
| 1S1Q | -19.30185444 | -1.169023504 |
| 1SBB | -18.28715386 | 0.483298178  |
| 1T6B | -33.26821888 | 1.072431764  |
| 1UDI | -31.29485563 | -0.573202933 |
| 1VFB | -62.96471144 | 0.348637304  |
| 1WEJ | -104.8165474 | -1.758390481 |
| 1WQ1 | -45.1790377  | 5.333639239  |
| 1XD3 | -41.74582764 | -3.310605424 |
| 1XQS | -43.62625477 | 7.234461429  |
| 1Y64 | -24.2190826  | 2.761010269  |
| 1YVB | -28.64731091 | -5.436684574 |
| 1Z0K | -34.69920814 | -1.654461093 |
| 1Z5Y | -25.50751062 | -3.157504953 |
| 1ZHI | -21.16309253 | 0.554241743  |
| 2AJF | -23.45379019 | 0.332859062  |
| 2B42 | -49.02360353 | 3.413997308  |
| 2C0L | -30.44703556 | -0.04248516  |
| 2CFH | -44.60168935 | -6.697274855 |
| 2FD6 | -94.0223432  | -9.270013448 |



|      |              |              |
|------|--------------|--------------|
| 2H7V | -25.88882494 | -0.920257781 |
| 2HLE | -39.30492272 | -0.621026719 |
| 2HMI | -173.5394503 | -15.0163291  |
| 2HQS | -42.74311503 | 3.14923728   |
| 2HRK | -23.38892236 | -2.168018671 |
| 2I25 | -33.8624378  | 2.710827828  |
| 2JEL | -92.53457608 | -5.697515866 |
| 2MTA | -81.5874515  | -3.798532509 |
| 2NZ8 | -43.7237785  | 0.953650269  |
| 2O8V | -30.18021419 | -5.543867281 |
| 2O0B | -15.03014752 | -1.742109743 |
| 2OT3 | -48.56055082 | -5.642633794 |
| 2PCC | -12.95319306 | 2.634516286  |
| 2QFW | -126.7921897 | -16.6149109  |
| 2SIC | -30.81221924 | -6.676411181 |
| 2SNI | -32.40890511 | -4.890798909 |
| 2UUY | -31.38488132 | -0.764681958 |
| 2VIS | -86.42269461 | -10.03871608 |
| 7CEI | -29.84230953 | 5.223273938  |

\*\*\*\*\*

Group 31 -

REMARK Please use this file to submit your results for both designs and  
REMARK the ZDock benchmark.

REMARK Change the file name from GroupXXX.txt to represent your group's  
number.

REMARK Change 'Column1' and 'Column2' below to the first- and second-most  
REMARK important parameters in your score function

REMARK Specify the units for each column below:

Units for Column1: Z\_1

Units for Column2: Z\_k

REMARK Z\_1 and Z\_k are our used score for interaction prediction based on  
MEGADOCK.

| Column1(Z_1), | Column2(Z_k) |
|---------------|--------------|
| design_01,    | 0.230, 4.424 |
| design_02,    | 1.074, 4.418 |
| design_03,    | 3.037, 5.193 |
| design_04,    | 1.695, 4.256 |
| design_05,    | 0.628, 4.750 |
| design_06,    | 0.509, 4.471 |
| design_07,    | 1.339, 4.568 |
| design_08,    | 1.755, 4.665 |
| design_09,    | 0.126, 4.163 |

|            |         |       |
|------------|---------|-------|
| design_10, | 1.173,  | 5.209 |
| design_11, | 2.783,  | 4.753 |
| design_12, | 3.542,  | 4.935 |
| design_13, | 1.012,  | 4.640 |
| design_14, | 4.166,  | 4.696 |
| design_15, | 1.363,  | 6.651 |
| design_16, | 0.538,  | 5.366 |
| design_17, | 0.390,  | 5.202 |
| design_18, | -0.513, | 6.703 |
| design_19, | 3.481,  | 5.312 |
| design_20, | 4.718,  | 6.779 |
| design_21, | -0.593, | 4.544 |
| design_22, | 0.047,  | 5.111 |
| design_23, | 1.413,  | 4.932 |
| design_24, | 0.225,  | 5.049 |
| design_25, | 0.925,  | 4.636 |
| design_26, | 1.334,  | 6.506 |
| design_27, | 0.958,  | 4.356 |
| design_28, | 2.985,  | 6.054 |
| design_29, | 2.416,  | 5.955 |
| design_30, | 2.340,  | 6.096 |
| design_31, | 1.804,  | 5.552 |
| design_32, | 0.581,  | 4.781 |
| design_33, | 6.112,  | 6.112 |
| design_34, | 2.045,  | 4.528 |
| design_35, | -0.351, | 4.197 |
| design_36, | 1.505,  | 5.098 |
| design_37, | 3.584,  | 4.789 |
| design_38, | 3.201,  | 4.947 |
| design_39, | 0.352,  | 4.459 |
| design_40, | 0.446,  | 5.571 |
| design_41, | 0.640,  | 4.857 |
| design_42, | 1.962,  | 9.034 |
| design_43, | -0.159, | 4.367 |
| design_44, | 2.064,  | 4.478 |
| design_45, | 2.159,  | 7.982 |
| design_46, | -0.791, | 5.964 |
| design_47, | 0.972,  | 5.534 |
| design_48, | -0.121, | 4.520 |
| design_49, | 4.203,  | 5.567 |
| design_50, | 2.968,  | 6.413 |
| design_51, | 1.922,  | 4.631 |
| design_52, | 1.329,  | 4.302 |
| design_53, | 1.070,  | 5.821 |
| design_54, | 3.140,  | 4.799 |
| design_55, | 0.986,  | 4.544 |

|            |         |        |
|------------|---------|--------|
| design_56, | 2.015,  | 5.086  |
| design_57, | 2.907,  | 4.814  |
| design_58, | -0.267, | 5.860  |
| design_59, | 1.494,  | 4.925  |
| design_60, | 0.788,  | 4.604  |
| design_61, | 1.685,  | 4.388  |
| design_62, | 5.595,  | 5.595  |
| design_63, | 0.216,  | 5.158  |
| design_64, | 0.248,  | 4.388  |
| design_65, | 0.854,  | 5.502  |
| design_66, | -0.762, | 6.310  |
| design_67, | 0.652,  | 5.035  |
| design_68, | 3.763,  | 5.804  |
| design_69, | 0.354,  | 4.920  |
| design_70, | 2.332,  | 4.201  |
| design_71, | 1.892,  | 4.452  |
| design_72, | 0.219,  | 4.987  |
| design_73, | 1.381,  | 4.008  |
| design_74, | 3.631,  | 6.508  |
| design_75, | 1.091,  | 4.417  |
| design_76, | 2.806,  | 4.090  |
| design_77, | 1.929,  | 5.070  |
| design_78, | 2.818,  | 6.700  |
| design_79, | 0.336,  | 4.772  |
| design_80, | -0.294, | 4.758  |
| design_81, | -0.721, | 4.904  |
| design_82, | 5.337,  | 5.337  |
| design_83, | 4.863,  | 7.294  |
| design_84, | 1.074,  | 5.258  |
| design_85, | 2.042,  | 5.114  |
| design_86, | 0.134,  | 6.334  |
| design_87, | -0.030, | 4.734  |
| 1A2K,      | 1.464,  | 4.735  |
| 1ACB,      | 5.057,  | 5.057  |
| 1AHW,      | 4.171,  | 5.736  |
| 1AK4,      | 2.474,  | 4.892  |
| 1AKJ,      | 1.908,  | 5.010  |
| 1AVX,      | 1.962,  | 5.923  |
| 1AY7,      | 4.704,  | 5.568  |
| 1AZS,      | 4.450,  | 5.497  |
| 1B6C,      | 6.832,  | 6.832  |
| 1BGX,      | 14.433, | 14.433 |
| 1BJ1,      | 1.098,  | 5.311  |
| 1BKD,      | 9.914,  | 9.914  |
| 1BUH,      | 1.445,  | 4.825  |
| 1BVK,      | 1.004,  | 6.242  |

|       |         |        |
|-------|---------|--------|
| 1BVN, | 7.157,  | 7.157  |
| 1CGI, | 8.839,  | 8.839  |
| 1D6R, | 2.568,  | 5.806  |
| 1DE4, | -0.200, | 6.141  |
| 1DFJ, | 1.341,  | 4.820  |
| 1DQJ, | 1.140,  | 7.902  |
| 1E4K, | 2.221,  | 4.542  |
| 1E6J, | 3.578,  | 5.753  |
| 1E96, | 4.393,  | 5.018  |
| 1EAW, | 6.565,  | 7.492  |
| 1EER, | 8.452,  | 9.040  |
| 1EFN, | 3.175,  | 4.376  |
| 1EWY, | -0.156, | 5.236  |
| 1EZU, | 6.932,  | 8.157  |
| 1F34, | 9.752,  | 9.752  |
| 1F51, | 5.831,  | 7.557  |
| 1FAK, | 7.265,  | 7.265  |
| 1FC2, | 1.708,  | 6.068  |
| 1FQ1, | 2.595,  | 5.425  |
| 1FQJ, | -0.122, | 5.209  |
| 1FSK, | 3.359,  | 5.877  |
| 1GCQ, | 5.891,  | 5.891  |
| 1GHQ, | 3.527,  | 5.396  |
| 1GLA, | 0.491,  | 5.386  |
| 1GP2, | 4.191,  | 5.667  |
| 1GPW, | 6.424,  | 6.790  |
| 1GRN, | 5.598,  | 6.180  |
| 1H1V, | 0.184,  | 4.911  |
| 1HE1, | 5.631,  | 7.189  |
| 1HE8, | 3.712,  | 5.124  |
| 1HIA, | 1.199,  | 6.705  |
| 1I2M, | 8.455,  | 9.519  |
| 1I4D, | 2.430,  | 4.994  |
| 1I9R, | 0.200,  | 6.006  |
| 1IB1, | 4.444,  | 5.074  |
| 1IBR, | 8.081,  | 8.081  |
| 1IJK, | 1.871,  | 5.048  |
| 1IQD, | 6.479,  | 6.479  |
| 1IRA, | 10.078, | 10.078 |
| 1J2J, | 0.177,  | 5.351  |
| 1JMO, | 10.518, | 11.478 |
| 1JPS, | 3.231,  | 4.865  |
| 1K4C, | 4.925,  | 4.931  |
| 1K5D, | 7.464,  | 9.717  |
| 1K74, | 6.448,  | 6.608  |
| 1KAC, | 1.179,  | 6.621  |

|       |         |        |
|-------|---------|--------|
| 1KKL, | -0.689, | 4.488  |
| 1KLU, | 4.209,  | 4.302  |
| 1KTZ, | 0.824,  | 4.251  |
| 1KXP, | 9.238,  | 9.238  |
| 1KXQ, | 4.134,  | 4.666  |
| 1M10, | 7.108,  | 7.108  |
| 1MAH, | 5.602,  | 5.883  |
| 1ML0, | 5.545,  | 6.907  |
| 1MLC, | 0.234,  | 5.327  |
| 1N2C, | 7.851,  | 9.521  |
| 1N80, | 2.585,  | 6.779  |
| 1NCA, | 5.878,  | 5.878  |
| 1NSN, | 0.404,  | 5.159  |
| 1NW9, | 7.540,  | 7.540  |
| 1OPH, | -0.271, | 5.334  |
| 1PPE, | 7.417,  | 7.417  |
| 1PXV, | 8.093,  | 8.093  |
| 1QA9, | 0.201,  | 4.006  |
| 1QFW, | 1.362,  | 5.350  |
| 1R0R, | 0.730,  | 6.523  |
| 1R8S, | 9.424,  | 10.229 |
| 1RLB, | -1.162, | 7.716  |
| 1S1Q, | 1.968,  | 5.492  |
| 1SBB, | 1.356,  | 5.708  |
| 1T6B, | 1.652,  | 5.716  |
| 1UDI, | 1.951,  | 6.299  |
| 1VFB, | 1.799,  | 5.679  |
| 1WEJ, | 1.270,  | 6.052  |
| 1WQ1, | 7.426,  | 8.011  |
| 1XD3, | 9.036,  | 9.721  |
| 1XQS, | 6.380,  | 7.490  |
| 1Y64, | 1.650,  | 7.582  |
| 1YVB, | 1.452,  | 4.305  |
| 1Z0K, | 5.129,  | 5.216  |
| 1Z5Y, | 2.383,  | 4.487  |
| 1ZHI, | 0.390,  | 4.683  |
| 2AJF, | 1.863,  | 5.712  |
| 2B42, | 6.405,  | 6.712  |
| 2C0L, | 7.290,  | 7.290  |
| 2CFH, | 6.546,  | 9.394  |
| 2FD6, | -0.478, | 4.985  |
| 2H7V, | 1.659,  | 7.288  |
| 2HLE, | 4.315,  | 7.748  |
| 2HMI, | -0.654, | 5.756  |
| 2HQS, | 0.770,  | 5.882  |
| 2HRK, | 2.469,  | 4.829  |

2I25, 6.476, 6.476  
2JEL, 0.483, 5.909  
2MTA, 1.232, 3.593  
2NZ8, 3.837, 4.543  
2O8V, 5.683, 5.683  
2O0B, 0.452, 4.127  
2OT3, 8.787, 9.097  
2PCC, 0.947, 5.438  
2QFW, 2.185, 5.156  
2SIC, 4.378, 4.618  
2SNI, 4.838, 4.838  
2UUY, 4.660, 5.047  
2VIS, 3.572, 5.216  
7CEI, 3.335, 4.768

\*\*\*\*\*

Group 11-

REMARK Please use this file to submit your results for both designs and  
REMARK the ZDock benchmark.

REMARK Change the file name from GroupXXX.txt to represent your group's  
number.

REMARK Change 'Column1' and 'Column2' below to the first- and second-most  
REMARK important parameters in your score function

REMARK Specify the units for each column below:

Units for Column1: kcal/mol (these are the 'raw values', not yet multiplied  
with the weight specified in Table 2)

Units for Column2: kcal/mol (these are the 'raw values', not yet multiplied  
with the weight specified in Table 2)

|           | vdW(attractive) | Desolvation(ACE) |
|-----------|-----------------|------------------|
| design_1  | -59.211         | -5.060           |
| design_2  | -56.604         | -1.408           |
| design_3  | -90.800         | -5.772           |
| design_4  | -58.342         | -2.065           |
| design_5  | -60.512         | -2.596           |
| design_6  | -64.586         | -0.390           |
| design_7  | -71.300         | -3.730           |
| design_8  | -61.544         | -5.597           |
| design_9  | -52.135         | -6.524           |
| design_10 | -60.785         | -9.846           |
| design_11 | -57.970         | -1.277           |
| design_12 | -74.782         | -7.072           |
| design_13 | -66.480         | -2.505           |
| design_14 | -57.645         | -11.533          |
| design_15 | -74.065         | 2.023            |

|           |          |         |        |
|-----------|----------|---------|--------|
| design_16 | -71.865  | -5.685  |        |
| design_17 | -66.819  | 1.112   |        |
| design_18 | -63.008  | -2.433  |        |
| design_19 | -74.548  | -1.673  |        |
| design_20 | -103.010 |         | -2.059 |
| design_21 | -60.396  | -10.370 |        |
| design_22 | -63.594  | -5.837  |        |
| design_23 | -66.785  | -10.960 |        |
| design_24 | -70.290  | -1.010  |        |
| design_25 | -49.424  | -2.550  |        |
| design_26 | -66.516  | -2.649  |        |
| design_27 | -65.795  | -4.611  |        |
| design_28 | -59.110  | 0.959   |        |
| design_29 | -68.124  | -1.597  |        |
| design_30 | -88.040  | -9.013  |        |
| design_31 | -56.225  | -2.226  |        |
| design_32 | -45.850  | -5.716  |        |
| design_33 | -80.882  | -5.915  |        |
| design_34 | -86.106  | -4.554  |        |
| design_35 | -88.992  | -10.821 |        |
| design_36 | -61.574  | -4.090  |        |
| design_37 | -72.348  | -5.759  |        |
| design_38 | -81.454  | -10.013 |        |
| design_39 | -56.400  | -3.166  |        |
| design_40 | -59.345  | 0.178   |        |
| design_41 | -61.144  | -4.870  |        |
| design_42 | -66.668  | -4.619  |        |
| design_43 | -66.594  | -4.795  |        |
| design_44 | -83.359  | -9.864  |        |
| design_45 | -78.610  | -9.299  |        |
| design_46 | -59.006  | -2.098  |        |
| design_47 | -63.968  | -6.594  |        |
| design_48 | -69.579  | -6.901  |        |
| design_49 | -59.021  | -8.901  |        |
| design_50 | -64.798  | -1.720  |        |
| design_51 | -68.176  | -5.749  |        |
| design_52 | -81.641  | 4.354   |        |
| design_53 | -74.510  | -1.504  |        |
| design_54 | -64.937  | -6.404  |        |
| design_55 | -58.331  | -5.163  |        |
| design_56 | -59.447  | -5.104  |        |
| design_57 | -74.124  | -5.795  |        |
| design_58 | -73.496  | -4.355  |        |
| design_59 | -70.413  | -7.515  |        |
| design_60 | -57.813  | -4.300  |        |
| design_61 | -79.648  | -0.722  |        |

|           |          |         |
|-----------|----------|---------|
| design_62 | -74.618  | -5.347  |
| design_63 | -67.777  | -1.737  |
| design_64 | -50.724  | -3.860  |
| design_65 | -62.670  | -0.156  |
| design_66 | -62.801  | -12.640 |
| design_67 | -66.081  | 4.386   |
| design_68 | -60.169  | -4.496  |
| design_69 | -69.636  | -7.386  |
| design_70 | -60.055  | -4.456  |
| design_71 | -74.971  | -8.445  |
| design_72 | -81.564  | -2.248  |
| design_73 | -51.074  | 1.114   |
| design_74 | -50.711  | -5.319  |
| design_75 | -55.231  | -4.137  |
| design_76 | -83.435  | 3.631   |
| design_77 | -72.862  | -2.616  |
| design_78 | -55.220  | -3.458  |
| design_79 | -60.058  | 2.254   |
| design_80 | -58.315  | -3.441  |
| design_81 | -77.324  | 3.077   |
| design_82 | -71.819  | -6.820  |
| design_83 | -93.150  | -8.135  |
| design_84 | -77.284  | 0.680   |
| design_85 | -73.123  | -8.766  |
| design_86 | -53.359  | -3.035  |
| design_87 | -67.293  | -7.184  |
| 1A2K      | -87.348  | -5.415  |
| 1ACB      | -92.239  | -20.575 |
| 1AHW      | -110.399 | 13.443  |
| 1AK4      | -53.350  | -6.688  |
| 1AKJ      | -90.952  | 12.565  |
| 1AVX      | -115.029 | -3.416  |
| 1AY7      | -83.044  | 9.145   |
| 1AZS      | -98.373  | -8.108  |
| 1B6C      | -97.748  | -5.443  |
| 1BGX      | -331.511 | 22.395  |
| 1BJ1      | -131.143 | -7.178  |
| 1BKD      | -156.196 | 6.588   |
| 1BUH      | -79.766  | 2.631   |
| 1BVK      | -73.410  | 7.215   |
| 1BVN      | -125.282 | -10.624 |
| 1CGI      | -129.611 | -22.420 |
| 1D6R      | -72.814  | 1.384   |
| 1DE4      | -111.444 | 7.764   |
| 1DFJ      | -108.041 | 14.611  |
| 1DQJ      | -102.260 | 9.318   |



|      |          |        |         |
|------|----------|--------|---------|
| 1E4K | -64.499  | -2.672 |         |
| 1E6J | -74.843  | -6.445 |         |
| 1E96 | -71.076  | 2.206  |         |
| 1EAW | -115.413 |        | -0.288  |
| 1EER | -181.832 |        | 3.838   |
| 1EFN | -72.109  | -1.761 |         |
| 1EWY | -60.272  | 7.274  |         |
| 1EZU | -147.063 |        | -17.776 |
| 1F34 | -161.957 |        | -16.213 |
| 1F51 | -102.772 |        | 0.355   |
| 1FAK | -141.154 |        | 10.976  |
| 1FC2 | -64.540  | -2.972 |         |
| 1FQ1 | -73.902  | 3.717  |         |
| 1FQJ | -96.992  | 11.356 |         |
| 1FSK | -118.122 |        | -0.069  |
| 1GCQ | -67.671  | -5.674 |         |
| 1GHQ | -35.472  | -1.323 |         |
| 1GLA | -57.608  | -3.591 |         |
| 1GP2 | -111.312 |        | 1.382   |
| 1GPW | -110.355 |        | 2.057   |
| 1GRN | -113.559 |        | 7.689   |
| 1H1V | -97.035  | -0.775 |         |
| 1HE1 | -109.627 |        | -2.546  |
| 1HE8 | -65.197  | 2.530  |         |
| 1HIA | -105.017 |        | -8.187  |
| 1I2M | -147.846 |        | 20.676  |
| 1I4D | -83.289  | -0.043 |         |
| 1I9R | -78.824  | 5.841  |         |
| 1IB1 | -133.574 |        | 15.286  |
| 1IBR | -177.170 |        | 20.179  |
| 1IJK | -76.349  | 4.946  |         |
| 1IQD | -126.301 |        | -5.014  |
| 1IRA | -154.764 |        | 3.028   |
| 1J2J | -54.694  | -8.578 |         |
| 1JMO | -207.283 |        | -15.387 |
| 1JPS | -114.687 |        | 15.502  |
| 1K4C | -99.144  | -2.609 |         |
| 1K5D | -145.965 |        | 12.589  |
| 1K74 | -100.013 |        | 9.727   |
| 1KAC | -67.092  | 1.968  |         |
| 1KKL | -85.229  | 0.012  |         |
| 1KLU | -67.302  | 0.098  |         |
| 1KTZ | -52.892  | -6.940 |         |
| 1KXP | -157.666 |        | 7.246   |
| 1KXQ | -113.013 |        | -5.267  |
| 1M10 | -104.880 |        | 9.711   |

|      |                 |         |
|------|-----------------|---------|
| 1MAH | -103.722        | -11.874 |
| 1ML0 | -122.958        | -9.033  |
| 1MLC | -87.222 2.712   |         |
| 1N2C | -203.385        | -2.531  |
| 1N80 | -106.058        | -19.525 |
| 1NCA | -109.869        | 6.190   |
| 1NSN | -75.190 8.640   |         |
| 1NW9 | -125.360        | -18.411 |
| 1OPH | -89.242 -6.894  |         |
| 1PPE | -108.268        | -13.608 |
| 1PXV | -142.986        | -7.806  |
| 1QA9 | -56.817 13.001  |         |
| 1QFW | -80.756 4.463   |         |
| 1R0R | -91.890 -14.689 |         |
| 1R8S | -149.111        | -17.765 |
| 1RLB | -55.621 -1.851  |         |
| 1S1Q | -59.223 -3.248  |         |
| 1SBB | -55.095 1.386   |         |
| 1T6B | -100.892        | 3.033   |
| 1UDI | -95.447 -1.605  |         |
| 1VFB | -79.931 9.549   |         |
| 1WEJ | -84.120 15.623  |         |
| 1WQ1 | -141.802        | 15.083  |
| 1XD3 | -122.628        | -11.004 |
| 1XQS | -133.180        | 20.458  |
| 1Y64 | -80.931 7.718   |         |
| 1YVB | -88.242 -15.403 |         |
| 1Z0K | -102.206        | -4.745  |
| 1Z5Y | -76.601 -8.929  |         |
| 1ZHI | -65.549 1.567   |         |
| 2AJF | -74.064 0.941   |         |
| 2B42 | -151.548        | 9.596   |
| 2C0L | -93.457 -1.583  |         |
| 2CFH | -131.061        | -19.005 |
| 2FD6 | -74.863 -2.010  |         |
| 2H7V | -78.216 -2.602  |         |
| 2HLE | -118.014        | -1.756  |
| 2HMI | -61.616 -6.269  |         |
| 2HQS | -125.283        | 8.942   |
| 2HRK | -70.978 -6.242  |         |
| 2I25 | -100.796        | 7.666   |
| 2JEL | -84.438 4.702   |         |
| 2MTA | -57.673 -3.345  |         |
| 2NZ8 | -128.527        | 2.681   |
| 2O8V | -92.166 -15.677 |         |
| 200B | -42.484 -4.926  |         |

|      |          |         |
|------|----------|---------|
| 20T3 | -142.081 | -15.957 |
| 2PCC | -41.453  | 7.250   |
| 2QFW | -80.150  | -1.168  |
| 2SIC | -93.009  | -18.916 |
| 2SNI | -97.905  | -14.070 |
| 2UUY | -95.930  | -2.162  |
| 2VIS | -68.584  | -2.827  |
| 7CEI | -87.152  | 14.771  |

\*\*\*\*\*

Group 7 -

REMARK Please use this file to submit your results for both designs and  
REMARK the ZDock benchmark.

REMARK Change the file name from GroupXXX.txt to represent your group's  
number.

REMARK Change 'Column1' and 'Column2' below to the first- and second-most  
REMARK important parameters in your score function

REMARK Specify the units for each column below:

Units for Column1: in units of RT

Units for Column2: no units; it is the logarithm of the Rank of the docking  
solution

ATTRACT-Score after re-minimization  
the docking  
the provided complex  
after a systematic docking search

Logarithm of the Rank of  
solution closest to

|           |         |       |
|-----------|---------|-------|
| design_1  | -16.644 | 3.497 |
| design_2  | -14.679 | 4.920 |
| design_3  | -18.373 | 0.693 |
| design_4  | -13.671 | 5.541 |
| design_5  | -16.405 | 3.258 |
| design_6  | -17.422 | 1.099 |
| design_7  | -19.515 | 1.386 |
| design_8  | -17.867 | 0.693 |
| design_9  | -9.871  | 7.958 |
| design_10 | -16.906 | 3.332 |
| design_11 | -14.069 | 5.517 |
| design_12 | -7.862  | 8.160 |
| design_13 | -14.283 | 5.513 |
| design_14 | -15.778 | 4.718 |
| design_15 | -15.339 | 2.639 |
| design_16 | -21.667 | 0.000 |
| design_17 | -13.071 | 5.313 |
| design_18 | -15.396 | 3.761 |

|           |         |       |
|-----------|---------|-------|
| design_19 | -13.826 | 3.401 |
| design_20 | -24.610 | 0.000 |
| design_21 | -22.813 | 1.386 |
| design_22 | -12.965 | 5.004 |
| design_23 | -14.035 | 5.268 |
| design_24 | -16.301 | 2.890 |
| design_25 | -9.276  | 7.640 |
| design_26 | -10.853 | 7.809 |
| design_27 | -13.170 | 6.087 |
| design_28 | -13.558 | 4.564 |
| design_29 | -17.639 | 0.000 |
| design_30 | -22.989 | 0.000 |
| design_31 | -15.037 | 3.611 |
| design_32 | -11.572 | 7.288 |
| design_33 | -21.587 | 0.693 |
| design_34 | -23.192 | 0.000 |
| design_35 | -23.096 | 0.000 |
| design_36 | -19.520 | 2.639 |
| design_37 | -22.080 | 0.693 |
| design_38 | -14.043 | 3.045 |
| design_39 | -17.866 | 2.079 |
| design_40 | -15.769 | 5.209 |
| design_41 | -14.878 | 5.434 |
| design_42 | -12.192 | 5.956 |
| design_43 | -11.207 | 7.604 |
| design_44 | -21.438 | 1.609 |
| design_45 | -16.757 | 3.434 |
| design_46 | -14.514 | 4.369 |
| design_47 | -9.683  | 8.543 |
| design_48 | -13.283 | 5.666 |
| design_49 | -14.129 | 5.011 |
| design_50 | -17.068 | 1.099 |
| design_51 | -17.126 | 2.303 |
| design_52 | -19.405 | 1.099 |
| design_53 | -20.689 | 2.996 |
| design_54 | -13.519 | 5.412 |
| design_55 | -14.356 | 5.347 |
| design_56 | -9.645  | 8.339 |
| design_57 | -19.523 | 1.609 |
| design_58 | -15.294 | 4.511 |
| design_59 | -12.465 | 5.455 |
| design_60 | -15.338 | 4.682 |
| design_61 | -23.168 | 0.693 |
| design_62 | -14.888 | 3.807 |
| design_63 | -15.806 | 5.037 |
| design_64 | -13.182 | 5.638 |

|           |         |       |
|-----------|---------|-------|
| design_65 | -14.691 | 3.829 |
| design_66 | -16.136 | 3.497 |
| design_67 | -15.665 | 4.394 |
| design_68 | -11.068 | 6.576 |
| design_69 | -12.113 | 6.538 |
| design_70 | -14.251 | 5.707 |
| design_71 | -16.027 | 3.178 |
| design_72 | -13.028 | 5.956 |
| design_73 | -11.408 | 7.339 |
| design_74 | -13.150 | 6.347 |
| design_75 | -14.066 | 5.333 |
| design_76 | -11.357 | 7.274 |
| design_77 | -27.318 | 0.000 |
| design_78 | -11.425 | 7.430 |
| design_79 | -11.950 | 6.304 |
| design_80 | -16.292 | 3.367 |
| design_81 | -22.026 | 0.000 |
| design_82 | -17.344 | 1.609 |
| design_83 | -17.319 | 4.263 |
| design_84 | -16.923 | 3.367 |
| design_85 | -18.457 | 1.609 |
| design_86 | -12.172 | 6.205 |
| design_87 | -15.243 | 5.288 |
| 1A2K      | -21.196 | 0.000 |
| 1ACB      | -23.441 | 0.000 |
| 1AHW      | -18.820 | 2.079 |
| 1AK4      | -19.938 | 1.099 |
| 1AKJ      | -18.428 | 0.693 |
| 1AVX      | -27.226 | 0.000 |
| 1AY7      | -20.298 | 0.000 |
| 1B6C      | -27.424 | 0.000 |
| 1BGX      | -5.782  | 9.185 |
| 1BJ1      | -28.518 | 0.000 |
| 1BUH      | -20.029 | 0.000 |
| 1BVK      | -18.058 | 2.079 |
| 1BVN      | -31.345 | 0.000 |
| 1CGI      | -30.790 | 0.000 |
| 1D6R      | -20.888 | 0.000 |
| 1DFJ      | -29.619 | 0.000 |
| 1DQJ      | -15.870 | 3.689 |
| 1E6J      | -22.270 | 0.000 |
| 1E96      | -17.651 | 0.693 |
| 1EAW      | -27.000 | 0.000 |
| 1EER      | -31.699 | 0.000 |
| 1EWY      | -15.768 | 3.850 |
| 1EZU      | -28.307 | 0.000 |

|      |         |       |
|------|---------|-------|
| 1F34 | -32.465 | 0.693 |
| 1F51 | -25.894 | 0.000 |
| 1FAK | -30.314 | 0.000 |
| 1FC2 | -22.534 | 0.000 |
| 1FQ1 | -23.561 | 0.000 |
| 1FQJ | -20.311 | 0.000 |
| 1FSK | -30.278 | 0.000 |
| 1GCQ | -19.403 | 1.099 |
| 1GHQ | -5.870  | 9.527 |
| 1GP2 | -6.608  | 8.515 |
| 1GRN | -18.455 | 1.386 |
| 1H1V | -23.177 | 0.000 |
| 1HE1 | -23.992 | 0.000 |
| 1HE8 | -16.981 | 2.197 |
| 1HIA | -25.430 | 0.000 |
| 1I2M | -36.317 | 0.000 |
| 1I4D | -18.496 | 1.609 |
| 1I9R | -18.056 | 0.000 |
| 1IB1 | -21.416 | 0.000 |
| 1IBR | -27.969 | 0.000 |
| 1IJK | -25.971 | 0.000 |
| 1IQD | -27.911 | 0.000 |
| 1JPS | -22.721 | 0.000 |
| 1K4C | -29.713 | 0.000 |
| 1K5D | -29.208 | 0.000 |
| 1KAC | -17.231 | 2.565 |
| 1KKL | -18.439 | 3.296 |
| 1KLU | -21.236 | 0.000 |
| 1KTZ | -13.716 | 4.796 |
| 1KXP | -32.477 | 0.000 |
| 1KXQ | -27.394 | 0.000 |
| 1M10 | -22.822 | 0.000 |
| 1MAH | -18.722 | 1.386 |
| 1ML0 | -26.423 | 0.693 |
| 1MLC | -22.416 | 0.000 |
| 1NCA | -21.519 | 0.693 |
| 1NSN | -21.242 | 0.000 |
| 1PPE | -24.538 | 0.000 |
| 1QA9 | -17.660 | 1.609 |
| 1QFW | -21.309 | 0.000 |
| 1RLB | -17.971 | 0.000 |
| 1SBB | -21.381 | 0.000 |
| 1UDI | -24.829 | 0.000 |
| 1VFB | -19.408 | 0.000 |
| 1WEJ | -20.421 | 0.000 |
| 1WQ1 | -26.479 | 0.000 |

|      |         |       |
|------|---------|-------|
| 2HMI | -15.128 | 4.489 |
| 2JEL | -16.492 | 2.833 |
| 2MTA | -18.357 | 2.197 |
| 2PCC | -15.929 | 2.197 |
| 2QFW | -18.038 | 1.792 |
| 2SIC | -22.684 | 0.000 |
| 2SNI | -22.158 | 0.000 |
| 2VIS | -21.912 | 1.099 |
| 7CEI | -23.151 | 0.000 |
| 1J2J | -21.213 | 0.000 |
| 1IRA | -23.087 | 0.000 |
| 1GPW | -26.651 | 0.000 |
| 1GLA | -19.289 | 1.386 |
| 1EFN | -21.268 | 1.386 |
| 1E4K | -27.875 | 1.099 |
| 1BKD | -38.822 | 0.000 |
| 1AZS | -20.472 | 0.693 |
| 1Y64 | -18.682 | 2.485 |
| 1XQS | -30.959 | 0.000 |
| 1XD3 | -29.763 | 0.000 |
| 1T6B | -27.147 | 0.000 |
| 1S1Q | -15.847 | 1.099 |
| 1R8S | -34.505 | 0.693 |
| 1R0R | -25.159 | 0.000 |
| 1PXV | -28.588 | 0.000 |
| 1OPH | -26.582 | 0.000 |
| 1NW9 | -25.493 | 0.000 |
| 1N80 | -25.978 | 0.000 |
| 1K74 | -29.452 | 1.609 |
| 1JMO | -36.874 | 0.000 |
| 2CFH | -37.068 | 0.693 |
| 2C0L | -23.069 | 0.000 |
| 2B42 | -31.694 | 0.000 |
| 2AJF | -21.583 | 1.099 |
| 1ZHI | -19.302 | 1.946 |
| 1Z5Y | -21.417 | 0.693 |
| 1Z0K | -23.677 | 0.000 |
| 1YVB | -19.780 | 1.386 |
| 2UUY | -20.116 | 0.000 |
| 2OT3 | -20.509 | 0.000 |
| 200B | -16.177 | 2.079 |
| 208V | -23.684 | 0.000 |
| 2NZ8 | -28.925 | 0.000 |
| 2I25 | -23.232 | 1.099 |
| 2HRK | -19.743 | 0.000 |
| 2HQS | -27.587 | 0.000 |

2HLE -16.555 1.792  
2H7V -18.759 0.000  
2FD6 -22.064 0.693

\*\*\*\*\*

:::::::::::::

From this point on scripts for producing and analyzing the data

:::::::::::::

:::::::::::::

scripts/ddg\_sasa1.xml

:::::::::::::

Report the binding energy and buried surface area. Suggested commandline:

```
rosetta_scripts -s <PDB> -parser:protocol ddg_sasa1.xml -database ~/minirosetta_database -ex1 -ex2 -use_input_sc
```

```
<dock_design>
```

```
<SCOREFXNS>
```

```
</SCOREFXNS>
```

```
<FILTERS>
```

```
<Sasa name=sasa confidence=0/> buried surface area
```

```
<Ddg name=ddg confidence=0 repeats=3/> binding energy;
```

repeats: takes the average of several computations to reduce numerical error

```
</FILTERS>
```

```
<MOVERS>
```

```
<AtomTree name=docking_tree docking_ft=1/> forms a docking-compatible fold tree
```

```
</MOVERS>
```

```
<APPLY_TO_POSE>
```

```
</APPLY_TO_POSE>
```

```
<PROTOCOLS>
```

```
<Add mover_name=docking_tree filter_name=ddg/>
```

```
<Add filter_name=sasa/>
```

```
</PROTOCOLS>
```

```
</dock_design>
```

:::::::::::::

scripts/ddg\_sasa2.xml

:::::::::::::

Used to compute binding energies across the interface formed between chains 1/2 and 3. See ddg\_sasa1.xml for details

```
<dock_design>
```

```
<SCOREFXNS>
```

```
</SCOREFXNS>
```



```

<FILTERS>
  <Sasa name=sasa confidence=0 jump=2/>
  <Ddg name=ddg confidence=0 repeats=3 jump=2/>
</FILTERS>
<MOVERS>
  <AtomTree name=docking_tree docking_ft=1/>
</MOVERS>
<APPLY_TO_POSE>
</APPLY_TO_POSE>
<PROTOCOLS>
  <Add mover_name=docking_tree filter_name=ddg/>
  <Add filter_name=sasa/>
</PROTOCOLS>

```

</dock\_design>

::::::::::::

scripts/degree.xml

::::::::::::

Used to compute the average degree of residues at the interface. See Figure S2 for examples

Suggested commandline:

```

rosetta_scripts -s <PDB> -parser:protocol degree.xml -database ~/
minirosetta_database

```

<dock\_design>

<TASKOPERATIONS>

<ProteinInterfaceDesign name=pido repack\_chain1=0  
design\_chain1=0/> for computations spanning both chains, use  
repack\_chain1=1 design\_chain1=1

</TASKOPERATIONS>

<SCOREFXNS>

</SCOREFXNS>

<FILTERS>

<AverageDegree name=degree distance\_threshold=8  
threshold=8.5 task\_operations=pido confidence=0/> distance\_threshold: what  
radius sphere to use around each residue; threshold: how many residue  
neighbours to require within sphere; confidence: change to 1 to effect an  
actual filter; with 0, only reports values

</FILTERS>

<MOVERS>

<AtomTree name=docking\_tree docking\_ft=1/>

</MOVERS>

<APPLY\_TO\_POSE>

</APPLY\_TO\_POSE>

<PROTOCOLS>

```

                <Add mover=docking_tree filter=degree/>
            </PROTOCOLS>
</dock_design>
:::
scripts/dock1.xml
:::

```

Docking refinement of a complex using high-resolution RosettaDock (Gray et al. 2003, JMB 331, 281). Also reports binding energy, buried surface area and RMSD from starting structure.

Suggested commandline:

```

rosetta_scripts -s <PDB> -parser:protocol dock1.xml -database ~/
minirosetta_database -ex1 -ex2 -use_input_sc -nstruct 100

```

```

<dock_design>
  <SCOREFXNS>
  </SCOREFXNS>
  <FILTERS>
    <Sasa name=sasa confidence=0/> buried surface area
    <Ddg name=ddg confidence=0/> binding energy
    <Rmsd name=rmsd confidence=0/>
  </FILTERS>
  <MOVERS>
    <Docking name=dock1 fullatom=1 local_refine=1
score_high=score12/> To do more exansive docking use local_refine=0
  </MOVERS>
  <APPLY_TO_POSE>
  </APPLY_TO_POSE>
  <PROTOCOLS>
    <Add mover_name=dock1/>
    <Add filter_name=sasa/>
    <Add filter_name=ddg/>
    <Add filter_name=rmsd/>
  </PROTOCOLS>
</dock_design>

```

```

:::
scripts/dock2.xml
:::

```

Docking across the interface between chains 1/2 and 3. See dock1.xml for details.

```

<dock_design>
  <SCOREFXNS>
  </SCOREFXNS>
  <FILTERS>
    <Sasa name=sasa confidence=0/>
    <Ddg name=ddg confidence=0/>

```

```

        <Rmsd name=rmsd confidence=0/>
    </FILTERS>
    <MOVERS>
        <Docking name=dock1 fullatom=1 local_refine=1
movable_jumps=2 score_high=score12/>
    </MOVERS>
    <APPLY_TO_POSE>
    </APPLY_TO_POSE>
    <PROTOCOLS>
        <Add mover_name=dock1/>
        <Add filter_name=sasa/>
        <Add filter_name=ddg/>
        <Add filter_name=rmsd/>
    </PROTOCOLS>

```

</dock\_design>

::::::::::::

scripts/ppk0.xml

::::::::::::

Prepack a protein structure without separating the chains. Carries out sidechain minimization, repacking and minimization.

Suggested commandline:

```

rosetta_scripts -s <PDB> -parser:protocol ppk0.xml -database ~/
minirosetta_database -ex1 -ex2 -use_input_sc

```

<dock\_design>

<SCOREFXNS>

</SCOREFXNS>

<FILTERS>

</FILTERS>

<MOVERS>

<Prepack name=ppk jump\_number=0 scorefxn=score12/>

</MOVERS>

<APPLY\_TO\_POSE>

</APPLY\_TO\_POSE>

<PROTOCOLS>

<Add mover\_name=ppk/>

</PROTOCOLS>

</dock\_design>

::::::::::::

scripts/ppk1.xml

::::::::::::

Prepack a structure by first separating the chains. See ppk0.xml for details.

```

<dock_design>
  <SCOREFXNS>
  </SCOREFXNS>
  <FILTERS>
  </FILTERS>
  <MOVERS>
    <Prepack name=ppk jump_number=1 scorefxn=score12/>
  </MOVERS>
  <APPLY_TO_POSE>
  </APPLY_TO_POSE>
  <PROTOCOLS>
    <Add mover_name=ppk/>
  </PROTOCOLS>
</dock_design>
::::::::::::::::::
scripts/ppk2.xml
::::::::::::::::::
Prepack a structure by separating chains 1/2 from 3. See ppk0.xml for
details.
<dock_design>
  <SCOREFXNS>
  </SCOREFXNS>
  <FILTERS>
  </FILTERS>
  <MOVERS>
    <Prepack name=ppk jump_number=2 scorefxn=score12/>
  </MOVERS>
  <APPLY_TO_POSE>
  </APPLY_TO_POSE>
  <PROTOCOLS>
    <Add mover_name=ppk/>
  </PROTOCOLS>
</dock_design>
::::::::::::::::::
scripts/generic_ROC.gnu
::::::::::::::::::
#A script to generate a histogram with gnuplot. Switch XXX with the name of
the histogram and YYY with the data file. Use on the output from
ROC_coords.sh
#Sarel Fleishman 2011
set style fill solid 1.0 border -1
set style line 10 linetype 1
set xtics border nomirror
set ytics border nomirror
set xrange [0:1]
set yrange [0:1]

```

```
set xlabel 'Designs'
set ylabel 'Natives'
set title 'XXX'
set nokey
plot 'YYY' u 1:2 w lines, x
set terminal postscript enhanced color
set output 'XXX.eps'
replot
:::::::::::::
scripts/hist_generic.gnu
:::::::::::::
#Generates a histogram with gnuplot. Histograms are only supported from
gnuplot v4.4 onwards.
#Change XXX to the data file name
#Sarel Fleishman 2011

set style data histogram
set style histogram cluster gap 1
set boxwidth 0.9
set style fill solid 1.0 border -1
set style line 10 linetype 1
set xtics border nomirror
set ytics border nomirror
set xlabel 'Binding categories'
set ylabel 'Counts'
set xtic rotate by -45 scale 0
set terminal postscript enhanced color
set output 'XXX.eps'
plot 'XXX' using 4 ti 'designs', '' u 3:xticlabels(1) ti 'natives'
replot
```
